# Supplementary material for: Computational image features of immune architecture is associated with clinical benefit and survival in gynecological cancers across treatment modalities
Source: PubMed Central journal article supplement — J Immunother Cancer. 2022 Feb 3;10(2):e003833. doi: 10.1136/jitc-2021-003833 (PMC8814810; doi:10.1136/jitc-2021-003833), 2022-02-03
Supplement: jitc-2021-003833supp002.pdf [file jitc-2021-003833supp002.pdf]

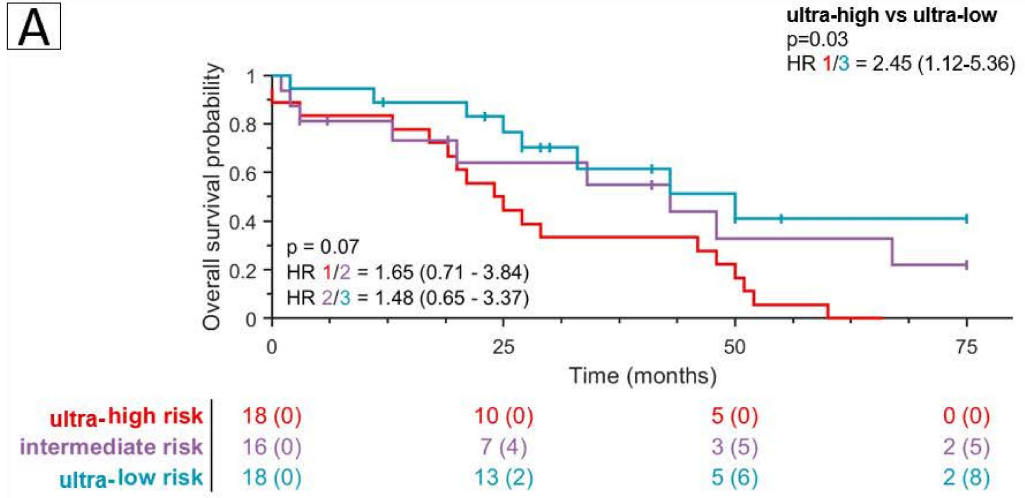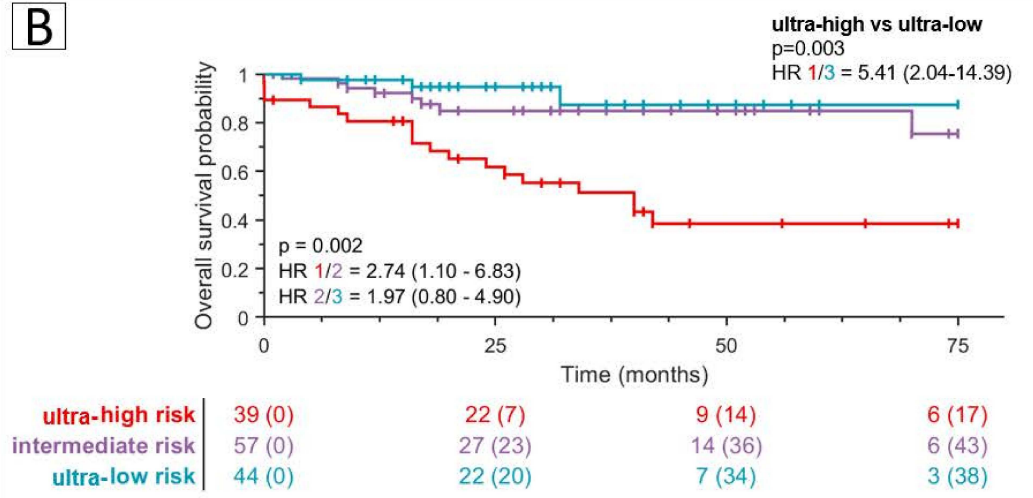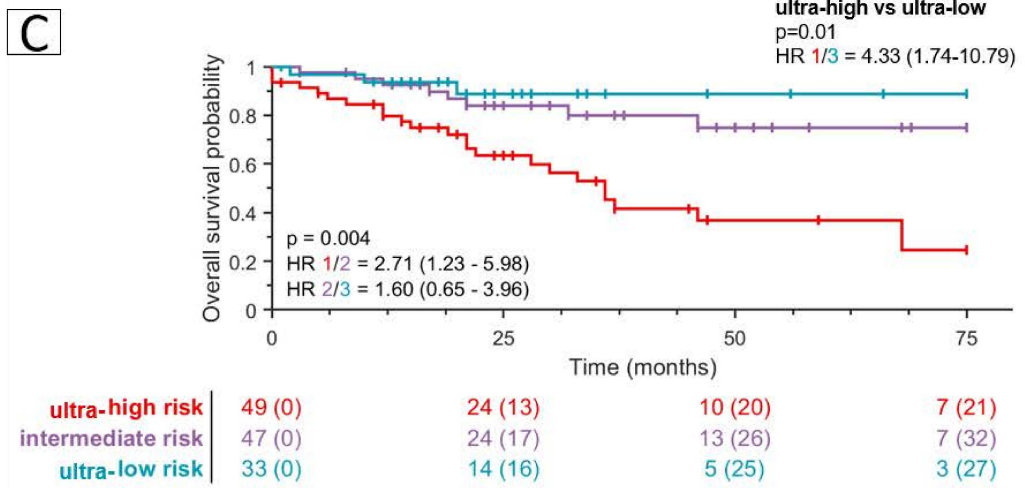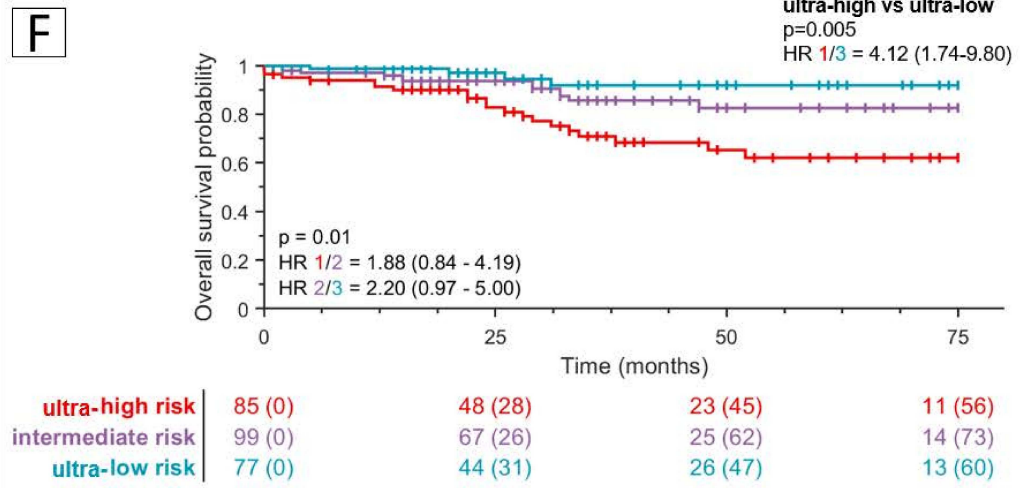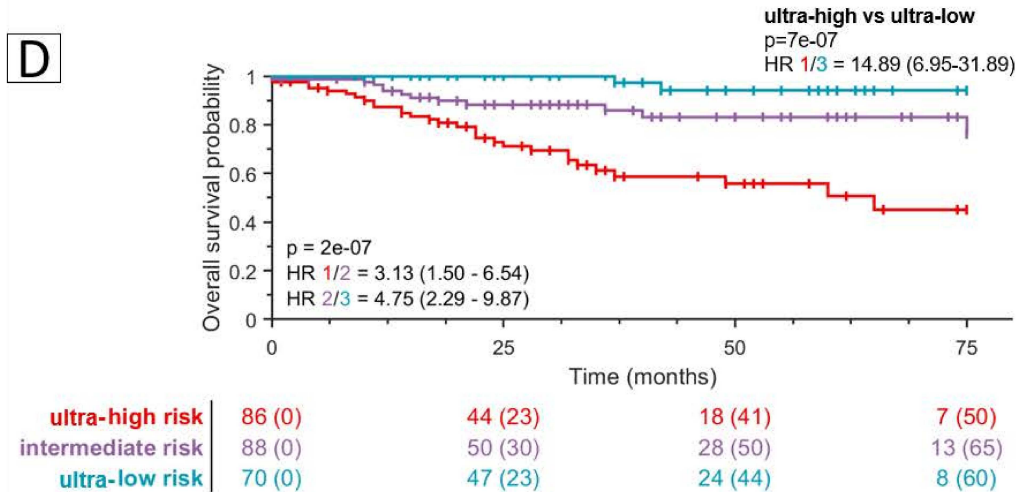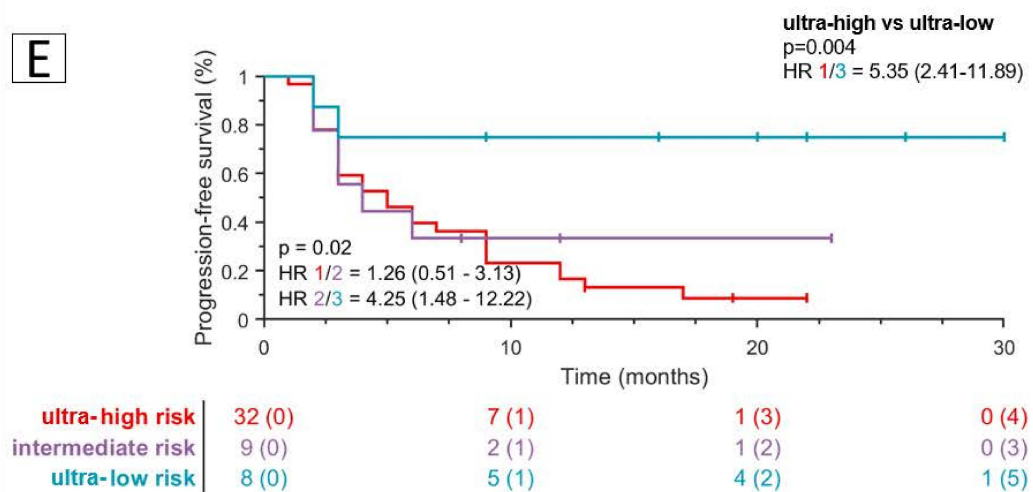



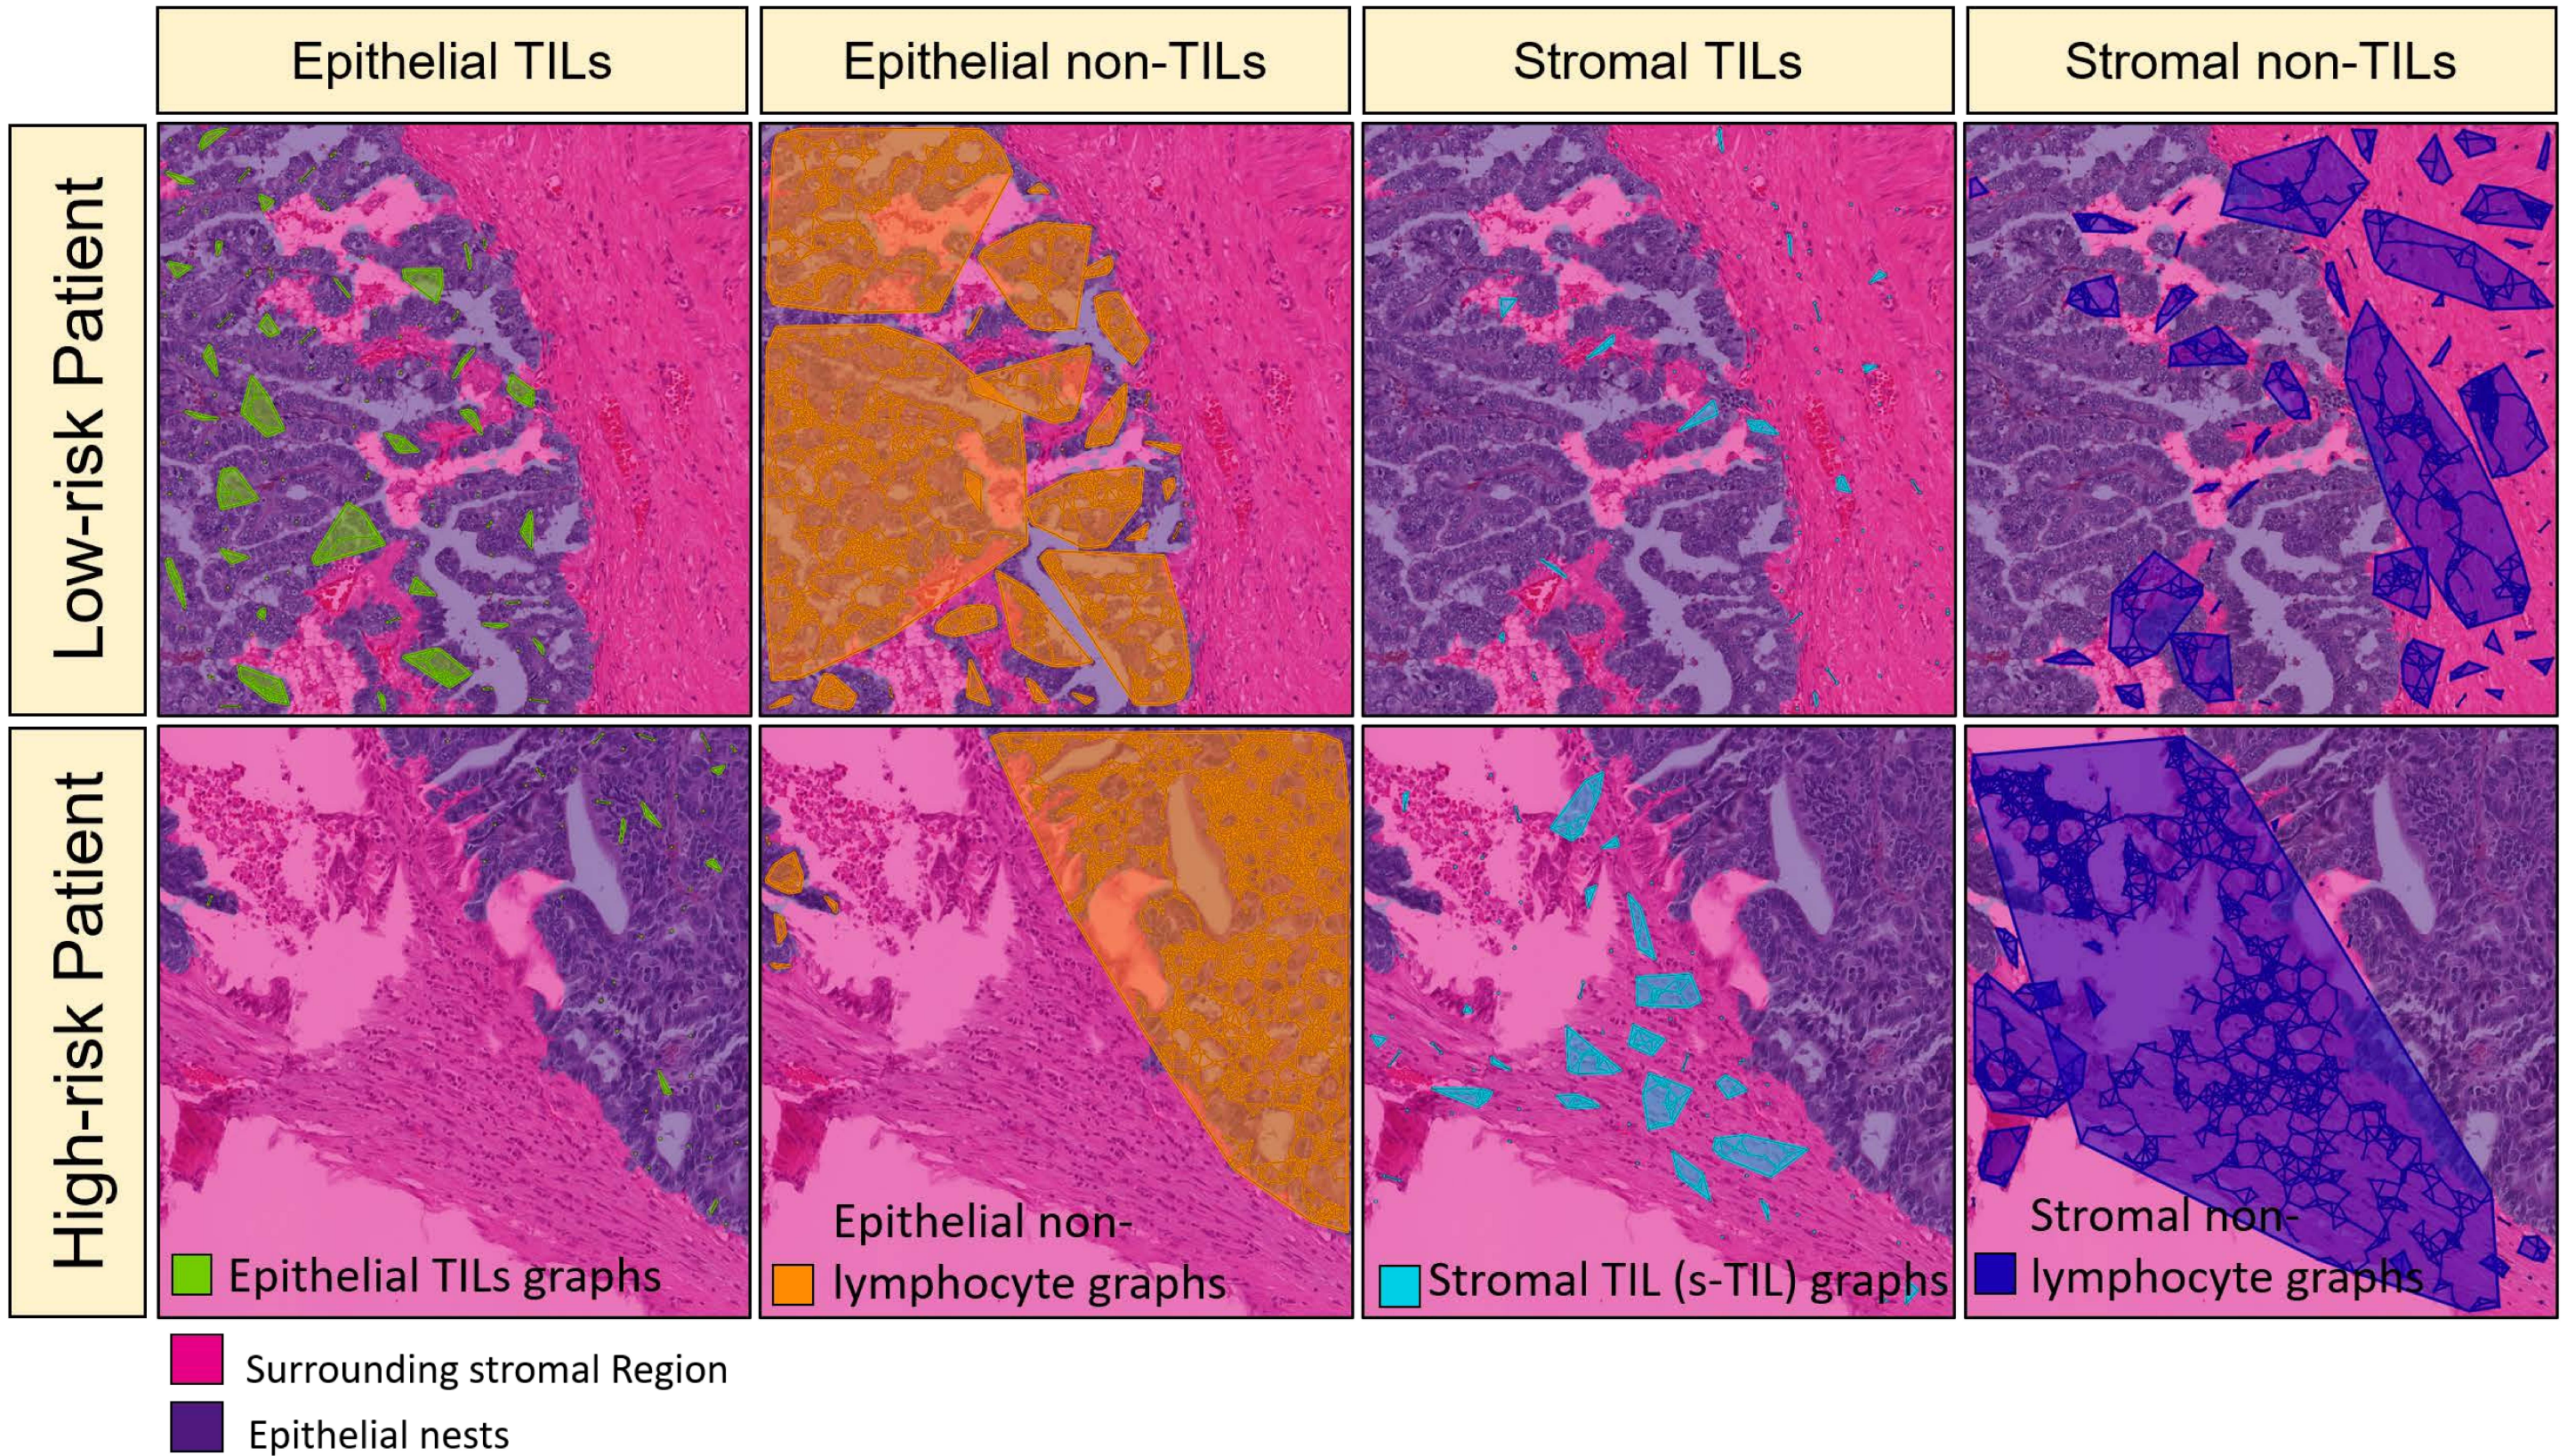



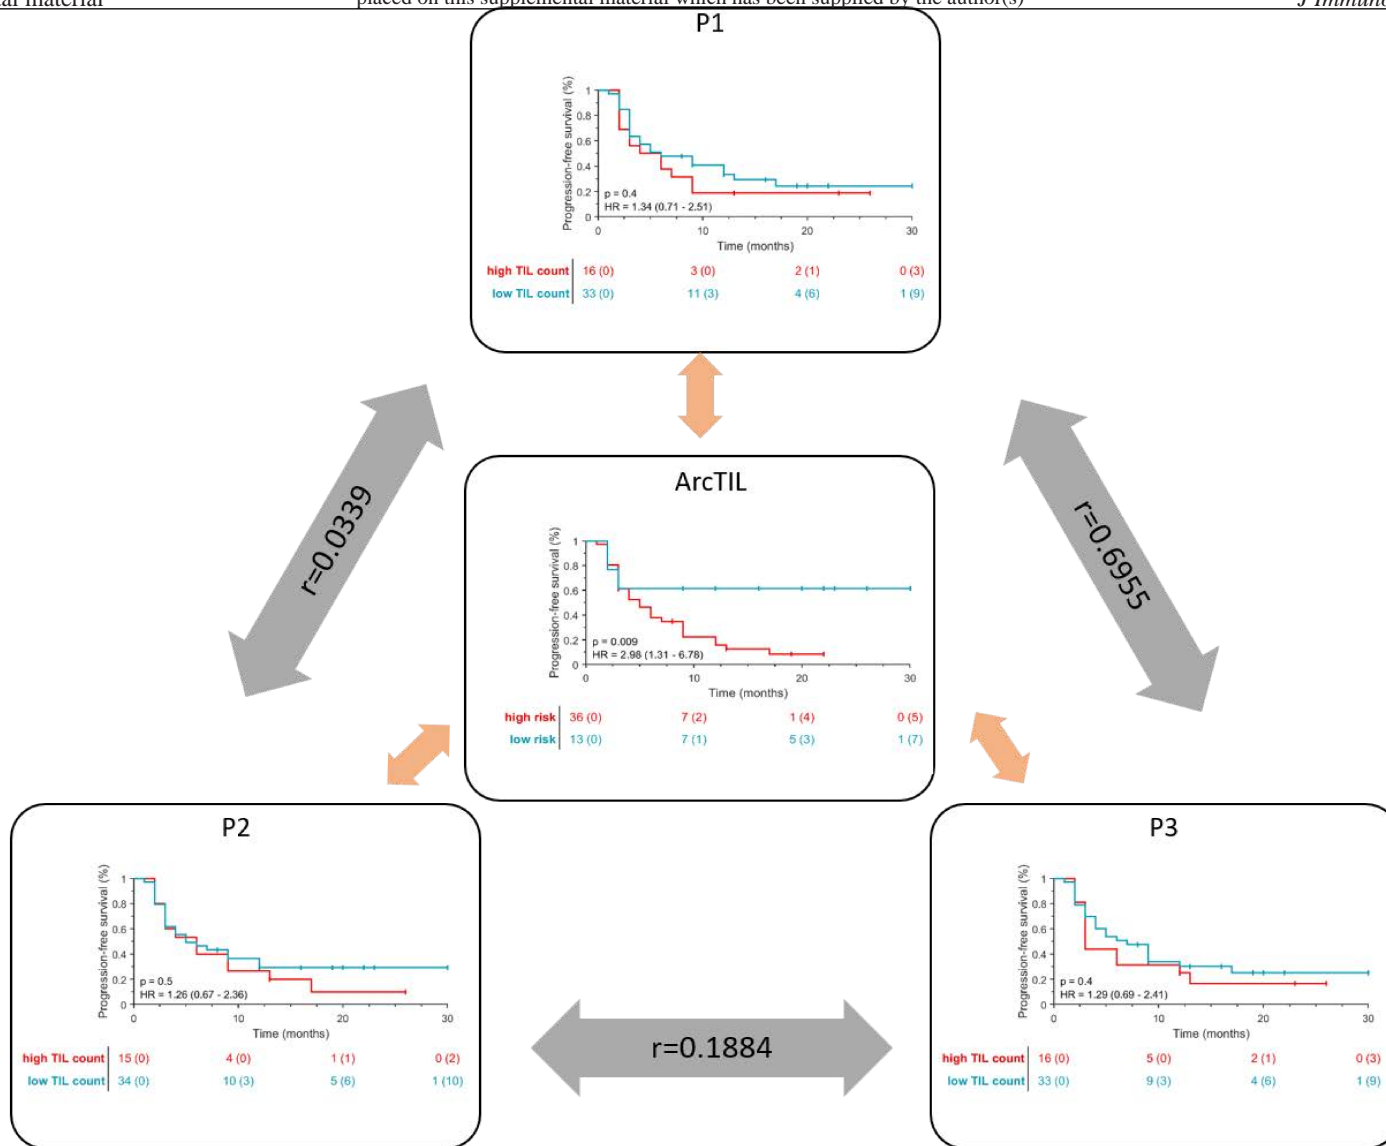



## Ovarian cancer

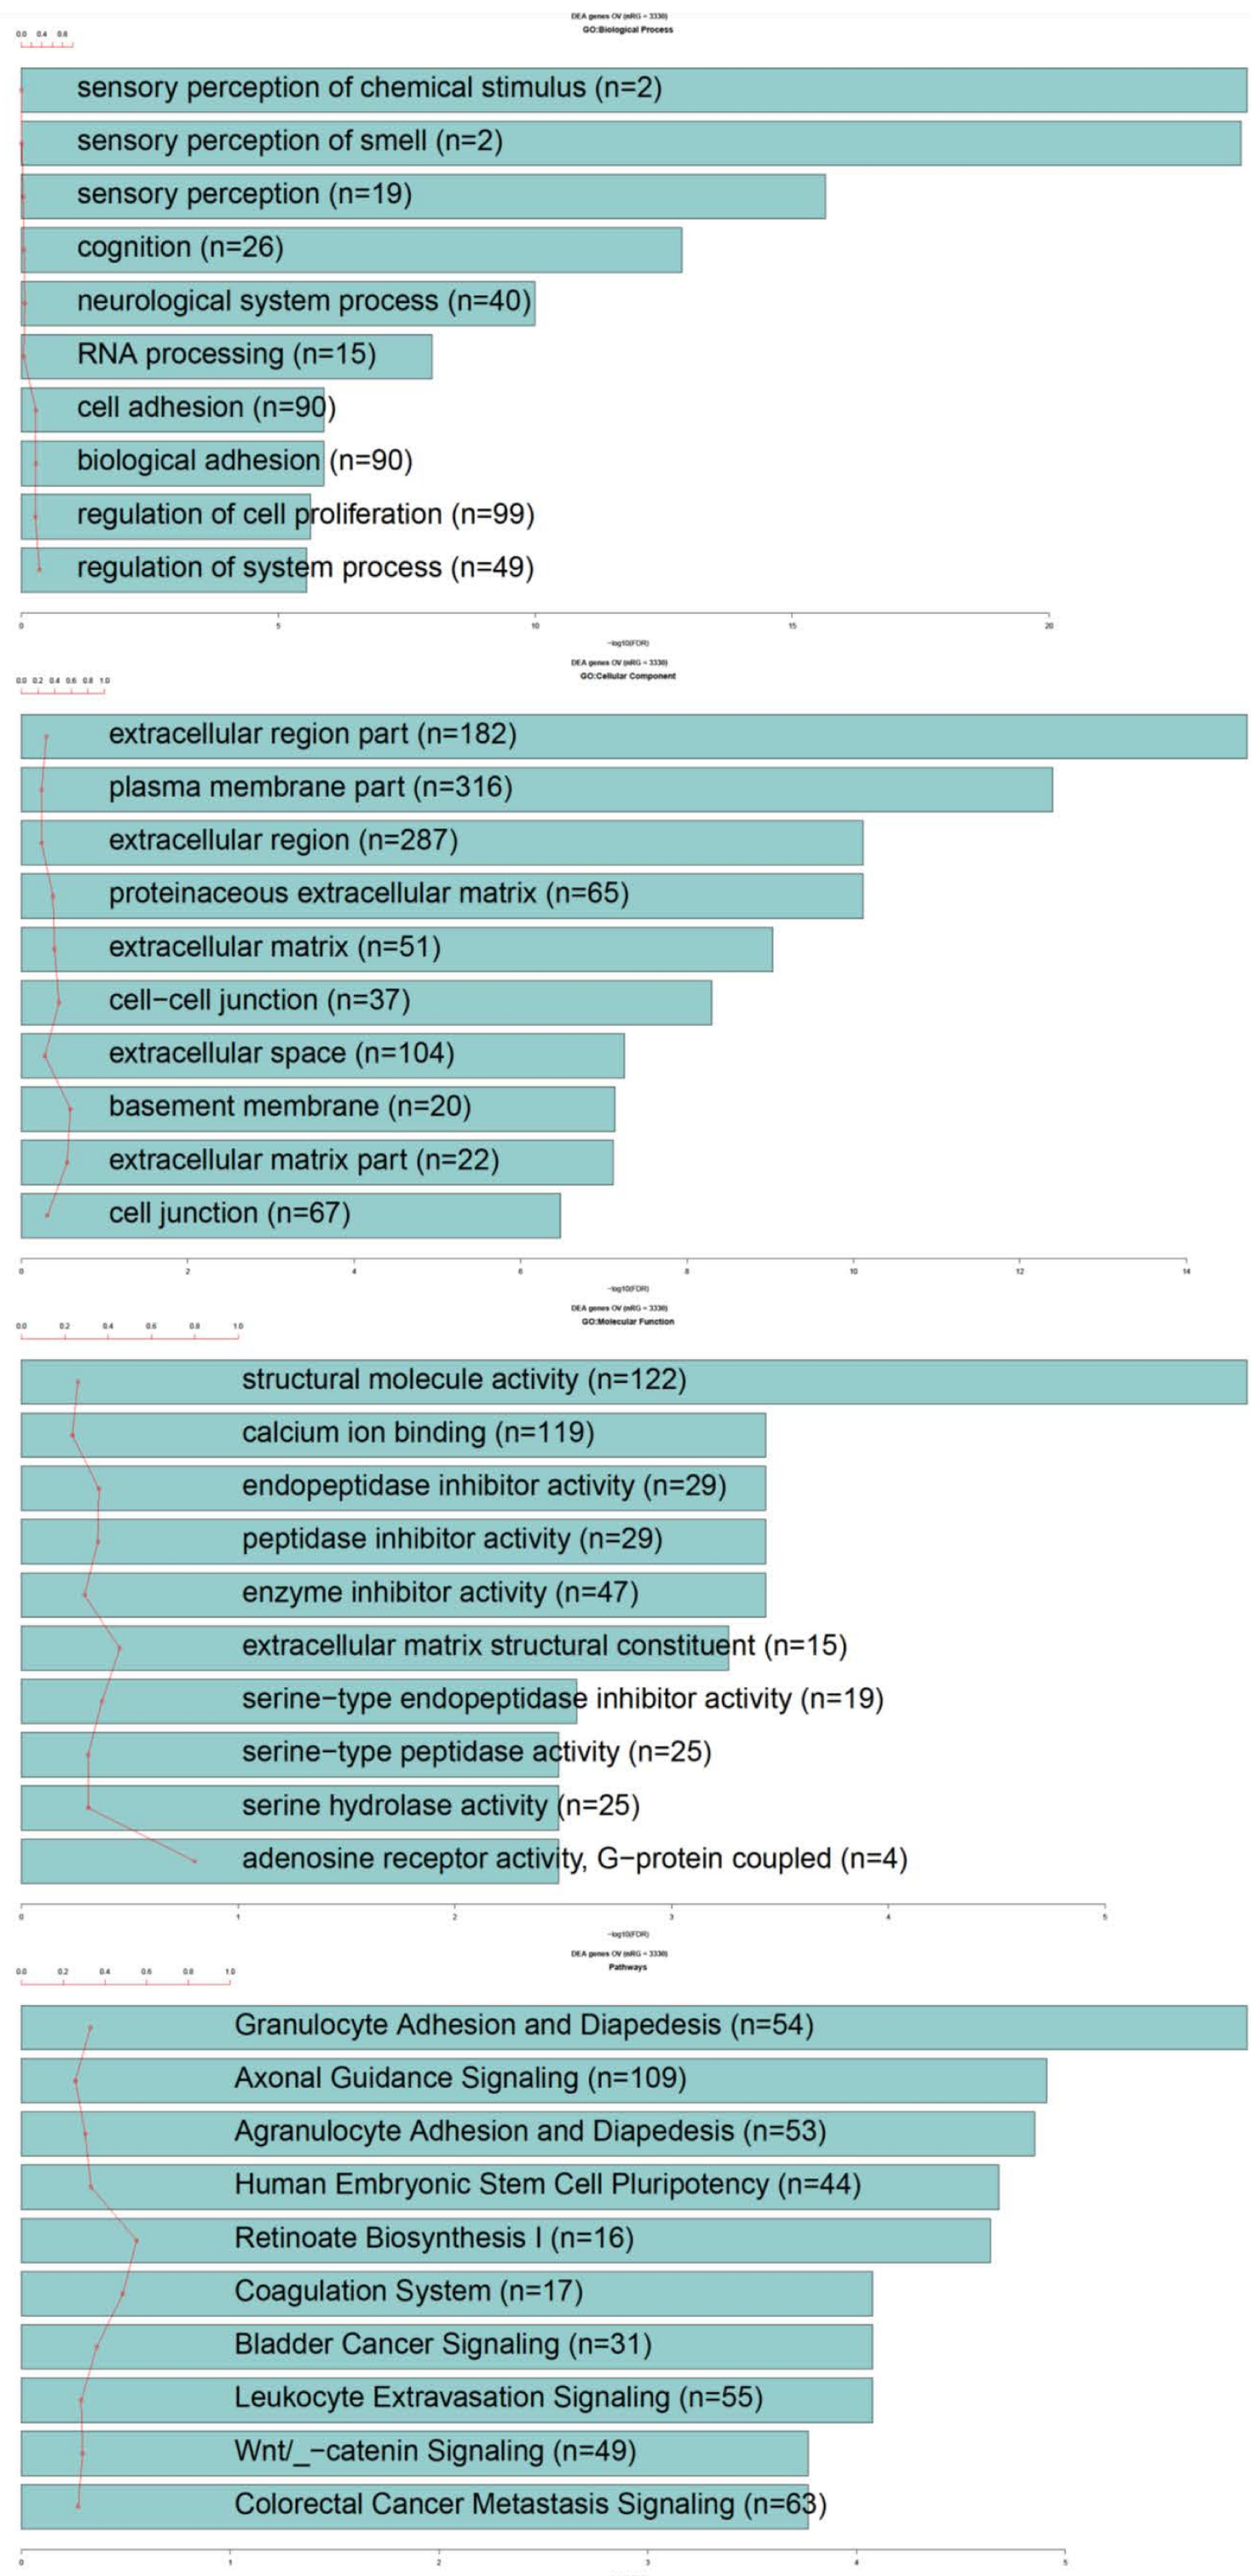

## Cervical cancer

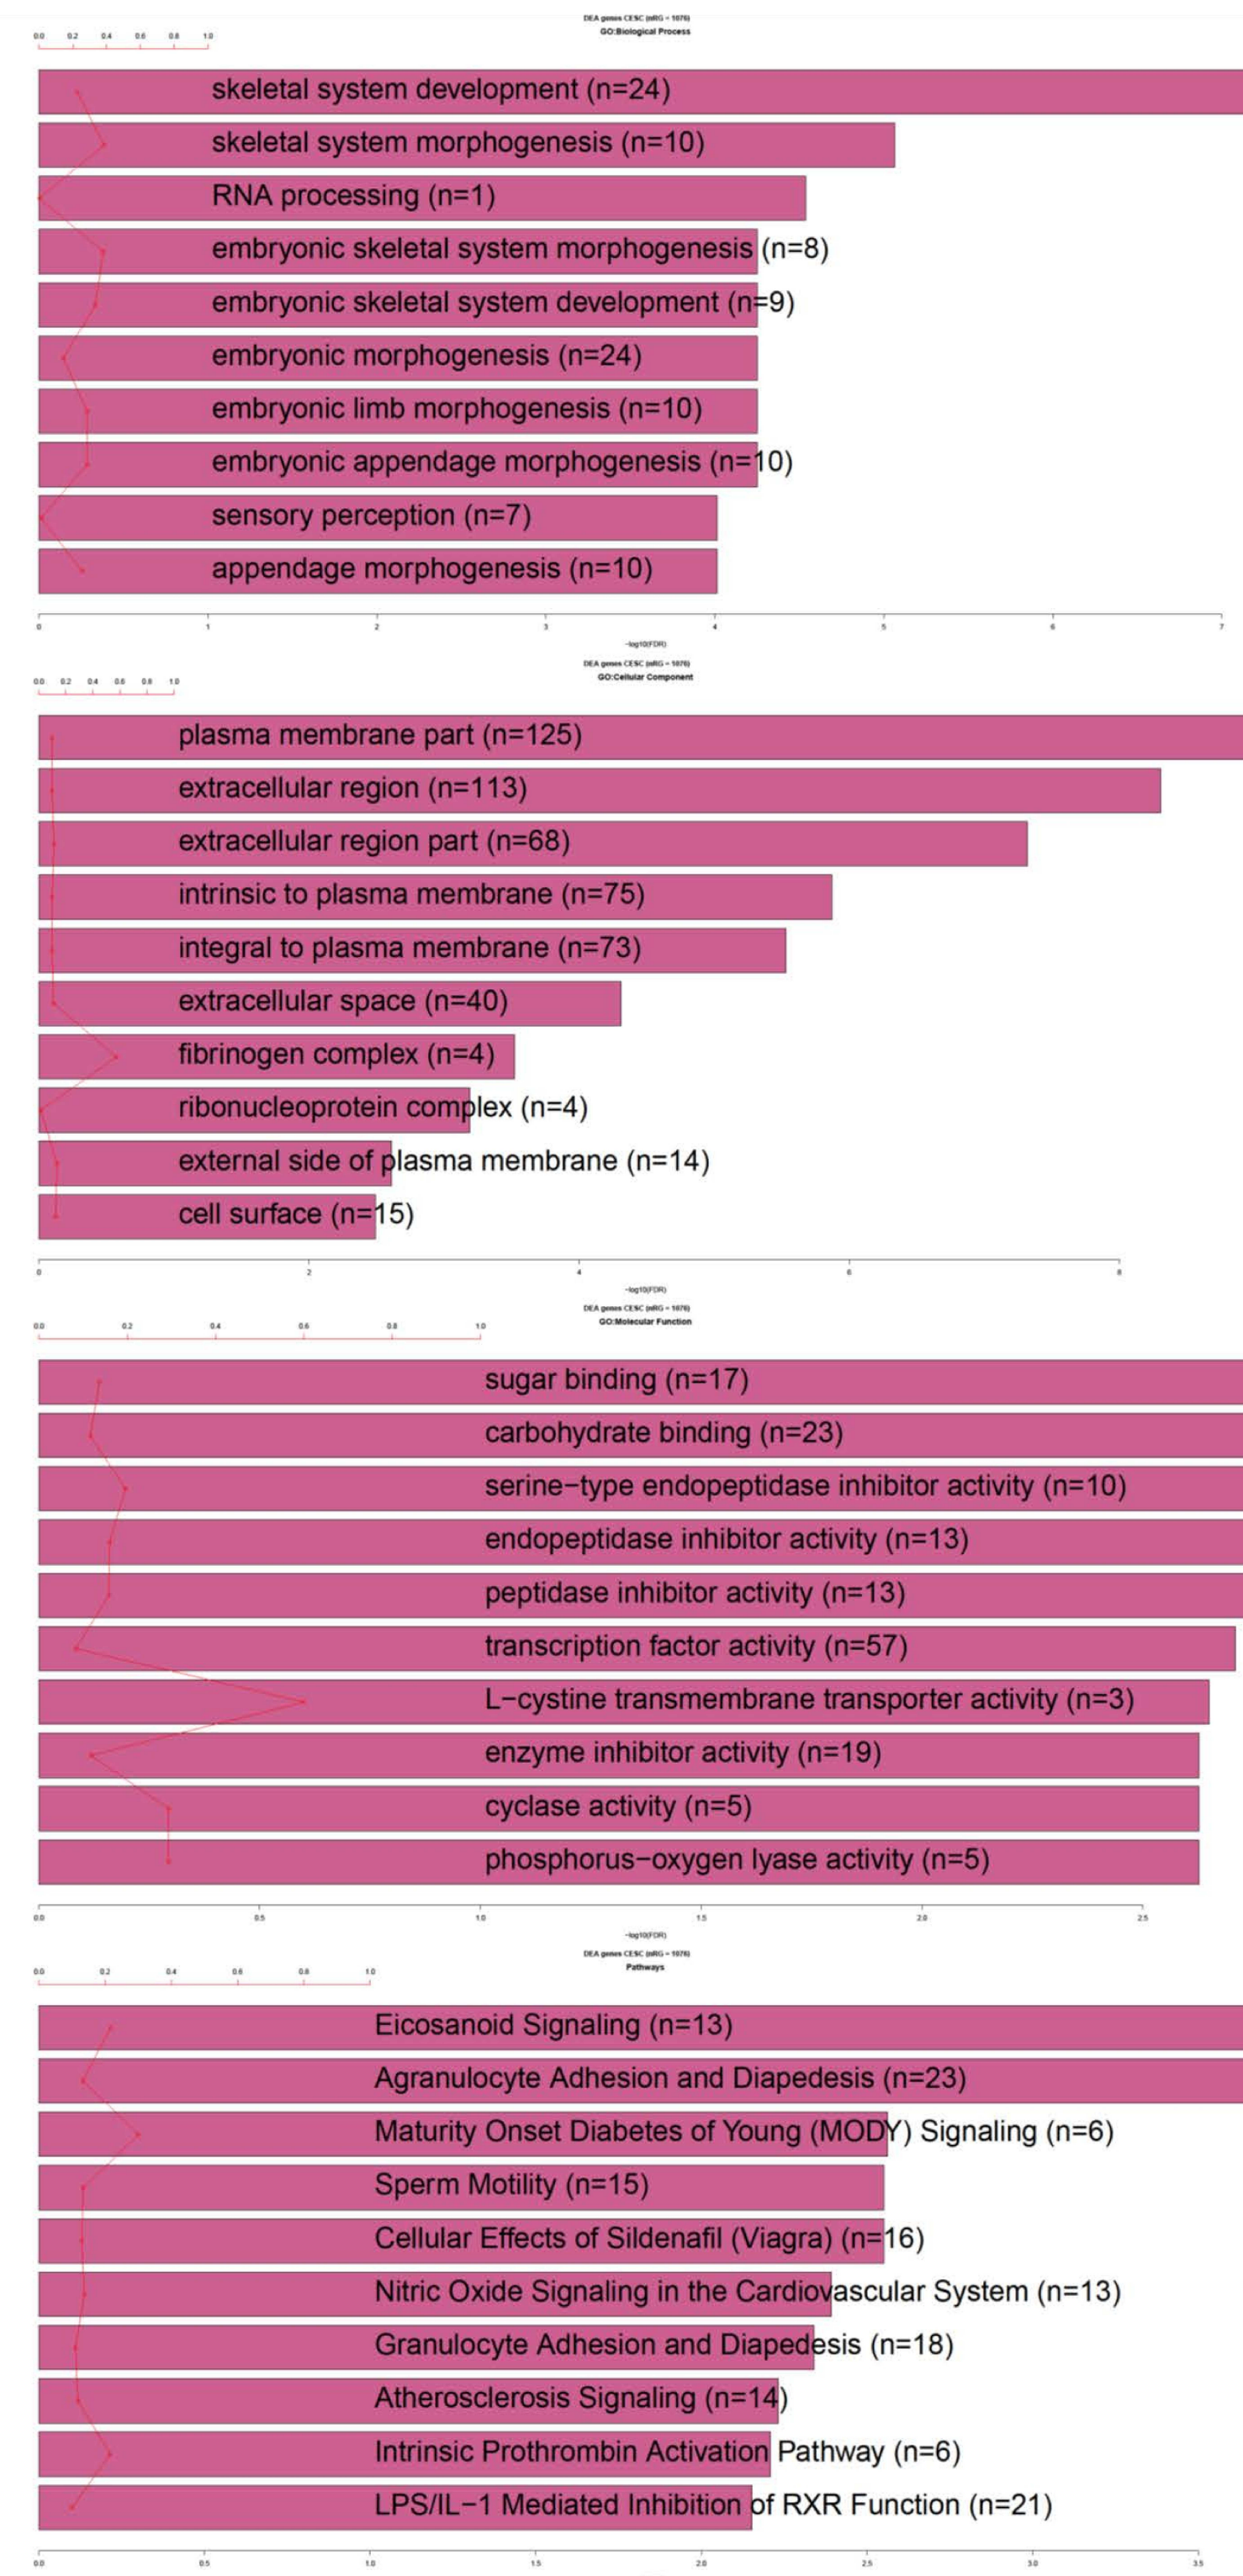

## Endometrial cancer

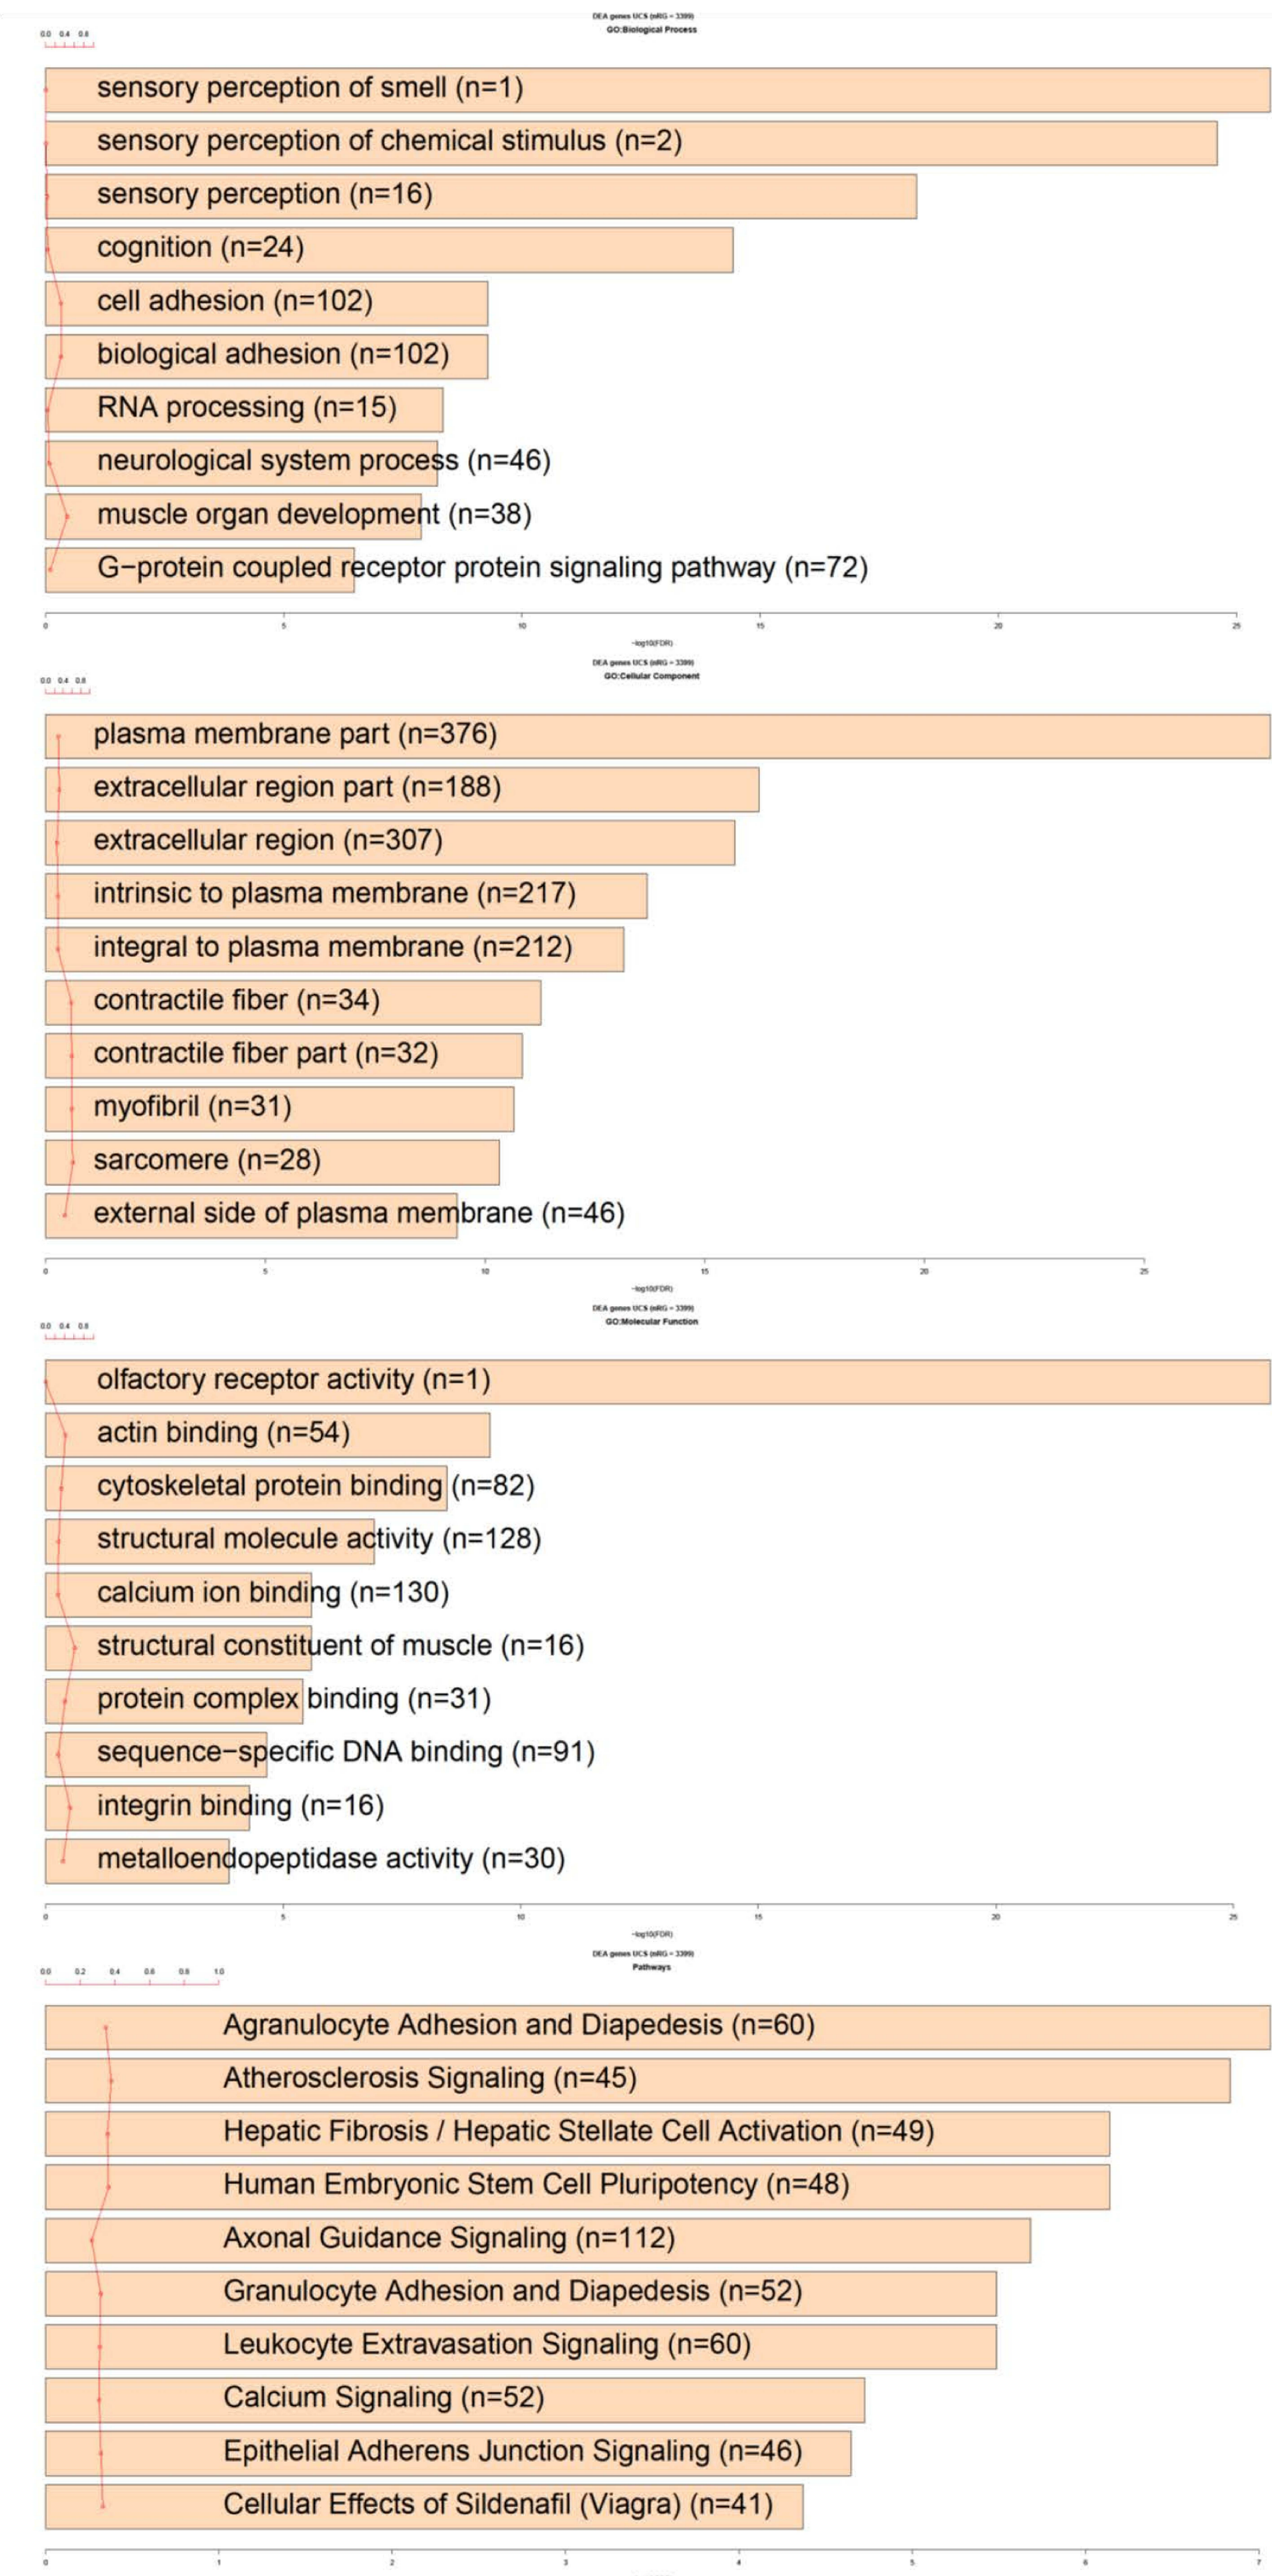



GO:0048514  
 GO:0001944  
 GO:0045595  
 GO:0051249  
 GO:0050852  
 GO:0031294  
 GO:0050776  
 GO:0002376  
 GO:0002857  
 GO:0006959  
 GO:0050870  
 GO:0072686  
 GO:0048522  
 GO:0050672  
 GO:0031589  
 GO:0007155  
 GO:0022610  
 GO:1901342  
 GO:0001525  
 GO:0030855  
 GO:0060429  
 GO:0042127

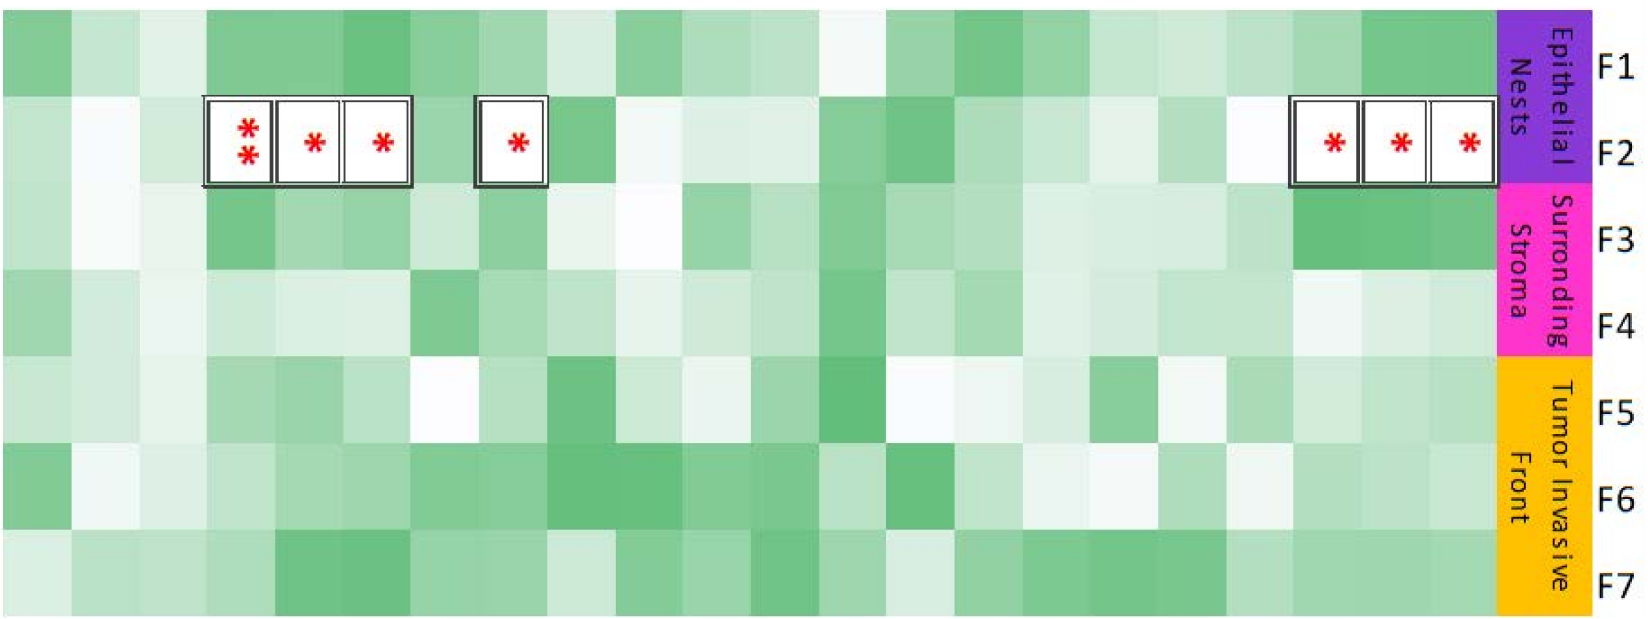



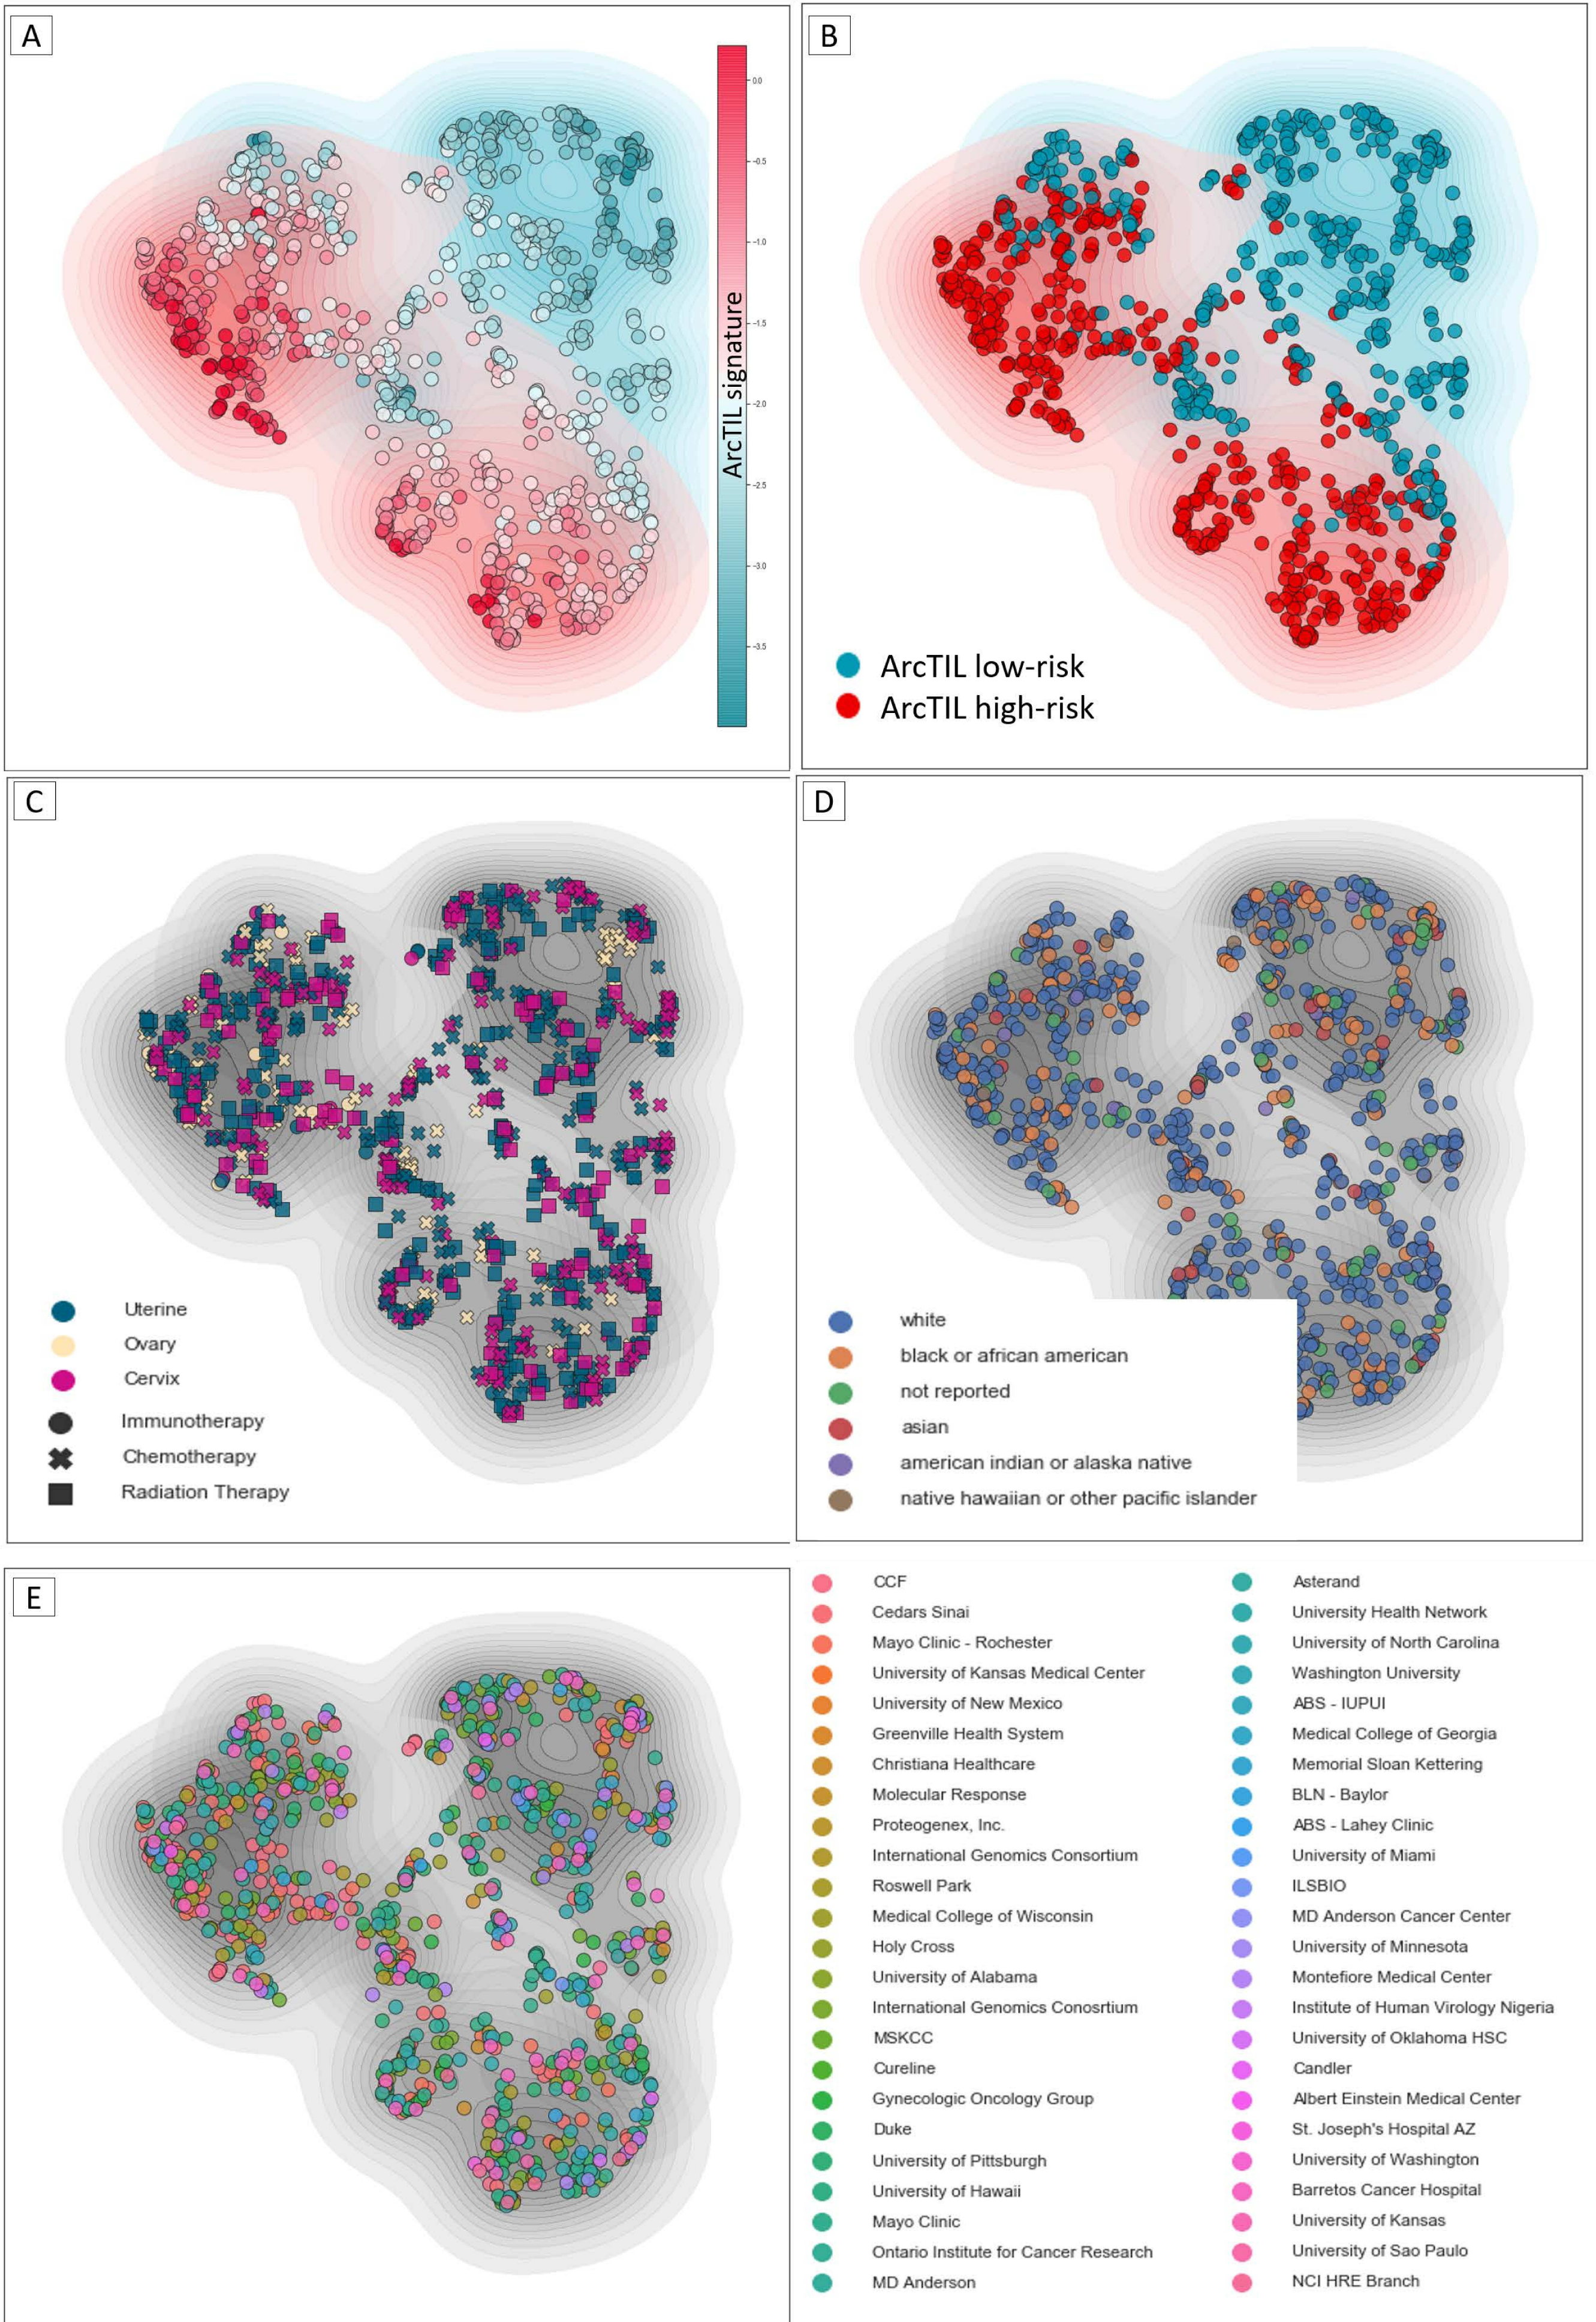



| Experiment | Training set     | n   | Number of selected features and geographical region | OC (chemo)    | CC (chemo)    | CC (radio)    | EC (chemo)    | EC (radio)    | CCF (IO)     |
|------------|------------------|-----|-----------------------------------------------------|---------------|---------------|---------------|---------------|---------------|--------------|
| E1         | OC (chemo)       | 51  | 7<br>· 2 E<br>· 2 S<br>· 3 T                        | 0.69<br>(52)  | 0.88<br>(140) | 0.78<br>(129) | 0.79<br>(261) | 0.85<br>(244) | 0.62<br>(49) |
| E2         | CC (chemo/radio) | 134 | 7<br>· 2 E<br>· 3 S<br>· 2 T                        | 0.80<br>(103) | 0.85<br>(71)  | 0.80<br>(64)  | 0.89<br>(261) | 0.81<br>(244) | 0.79<br>(49) |
| E3         | EC (chemo/radio) | 252 | · 1 E<br>· 3 S<br>· 4 T                             | 0.79<br>(103) | 0.72<br>(140) | 0.86<br>(129) | 0.90<br>(141) | 0.83<br>(112) | 0.82<br>(49) |
| E4         | GC (chemo/radio) | 292 | 7<br>· 3 E<br>· 1 S<br>· 3 T                        | 0.72<br>(69)  | 0.72<br>(94)  | 0.80<br>(85)  | 0.81<br>(178) | 0.87<br>(159) | 0.89<br>(49) |



| P1  | P2 | P3  |
|-----|----|-----|
| 22  | 2  | 22  |
| 19  | 2  | 10  |
| 45  | 14 | 61  |
| 76  | 24 | 190 |
| 41  | 65 | 112 |
| 33  | 15 | 37  |
| 33  | 20 | 37  |
| 30  | 15 | 21  |
| 19  | 11 | 27  |
| 34  | 22 | 40  |
| 26  | 24 | 33  |
| 39  | 19 | 28  |
| 19  | 0  | 10  |
| 17  | 4  | 15  |
| 11  | 1  | 27  |
| 36  | 10 | 28  |
| 52  | 13 | 13  |
| 26  | 8  | 23  |
| 47  | 6  | 60  |
| 38  | 9  | 39  |
| 41  | 4  | 36  |
| 22  | 5  | 22  |
| 34  | 4  | 17  |
| 33  | 14 | 25  |
| 33  | 14 | 35  |
| 18  | 6  | 22  |
| 21  | 6  | 14  |
| 71  | 45 | 49  |
| 44  | 5  | 51  |
| 25  | 9  | 17  |
| 123 | 13 | 54  |
| 34  | 12 | 10  |
| 168 | 57 | 258 |
| 18  | 6  | 20  |
| 17  | 3  | 21  |
| 84  | 7  | 69  |
| 55  | 16 | 50  |
| 33  | 4  | 10  |
| 19  | 1  | 3   |
| 14  | 1  | 9   |
| 36  | 6  | 17  |
| 41  | 17 | 18  |
| 46  | 16 | 54  |
| 51  | 4  | 18  |
| 32  | 2  | 12  |



|    |    |    |
|----|----|----|
| 21 | 5  | 19 |
| 46 | 1  | 40 |
| 42 | 23 | 79 |
| 45 | 27 | 61 |



PTMS  
HIST1H3F  
HUS1  
RAX  
CNTN6  
TRPC4AP  
GGA1  
IL1F7  
NUDCD3  
EHMT1  
RCE1  
SMPDL3B  
CD40  
THOC6  
NDUFAF1  
SDF2L1  
MRPS12  
BMP8B  
SPTLC1  
FBXW4  
CCNG2  
SEPX1  
SH3GLB2  
WBSCR16  
ADRA1D  
P2RY11  
WBP11  
CYP27A1  
DYNLRB1  
GPR3  
NTN1  
DDX56  
HP1BP3  
PHF11  
GUSB  
KIAA1219  
GBX2  
SPTAN1  
TBRG4  
ONECUT2  
UBXD2  
DNMBP  
PPIA  
SOD3  
MSI1  
RAMP3  
ACSL5



HPGD  
IRF2  
TSC2  
IQSEC2  
TSPAN15  
C1orf216  
EGFL7  
LECT1  
ASTN1  
ATP6V0C  
CRYGC  
DHX32  
LOC283871  
PON1  
EIF4E  
PAK4  
E4F1  
HPCAL4  
URG4  
ZMIZ2  
C4BPB  
DNAH9  
GPX4  
XPO4  
DTNA  
LTF  
DLG5  
EHF  
GABRA3  
NT5C2  
SEC31B  
C9orf31  
MOCS3  
PIAS4  
MRP63  
HCFC1R1  
C1QL1  
GOLGA8A  
SLC46A3  
GSPT2  
MEX3D  
MBOAT5  
UBTF  
ACLY  
CREBBP  
SLC22A3  
C21orf25

NDUFB8  
PDCL3  
TMEM156  
BAAT  
BNC1  
CDK5RAP2  
PMAIP1  
WASF3  
POLD2  
EYA3  
TNFSF10  
SIPA1L3  
TTLL5  
HLA-G  
SAG  
C10orf6  
DYRK1B  
PARK2  
RALA  
ECHDC2  
IL15RA  
PDZD7  
PLEKHB1  
RAB6A  
HCP5  
MRPS34  
TMED5  
EEF1A2  
NMUR1  
USP5  
ZNF510  
C20orf149  
GLE1L  
TM7SF3  
CEACAM6  
POMGNT1  
PRDM8  
ACTR5  
HIST1H3C  
RBBP9  
WDR18  
CLK4  
RSHL1  
SERTAD3  
RIN1  
TNFRSF12A  
TOM1L2



ZBED2  
C9orf91  
PCYOX1  
SULT1A1  
CRYM  
GSTM3  
LOH11CR2A  
MST1R  
NDRG4  
POU6F2  
BLNK  
SCUBE2  
SPOCK2  
TNFRSF14  
PSMC4  
STARD13  
TMPRSS11D  
TRAPPC3  
ZNF672  
CPEB1  
DARS  
KIAA0090  
KIAA0256  
MAPRE1  
PSMD8  
SYT1  
UBD  
CDCP1  
NFE2  
DKFZp547H025  
ATXN2L  
DPM2  
FGR  
NIPSNAP3B  
OTUD7B  
CCNK  
EBP  
INPP4A  
MGAM  
MYOHD1  
PASK  
PLEKHG6  
SEMA3D  
C7orf42  
MYH13  
TNFSF14  
BANF1

FBXO17  
IFT140  
MAP3K2  
SARS2  
CDS1  
HERC4  
ITPKC  
KIR2DL4  
PPP5C  
RAG2  
ROGDI  
TAP1  
TM7SF2  
USP33  
ZNF671  
APOL3  
CHODL  
KEL  
PTPRN2  
UPF3B  
CRKRS  
DEXI  
DLGAP1  
EBF2  
MOBKL1B  
SCAMP4  
TUBB1  
ENOSF1  
FRAT1  
SFRS9  
BAALC  
CXorf1  
DLX6  
HPS1  
IL7  
LRRTM2  
NUDT9  
PPP1R3A  
PTPN18  
RAB1A  
SCT  
TM7SF4  
USP3  
BCAS4  
C22orf31  
GBL  
HEBP1



KCNAB2  
STXBP5L  
TASP1  
CIAPIN1  
PCSK6  
RHBDL1  
RNPS1  
RTF1  
STK11  
UBE1L  
IQSEC3  
LRP6  
LRRTM4  
PDE6C  
AOF2  
BCS1L  
CMAS  
GAST  
GRB10  
SAT1  
VIPR1  
APOBEC3C  
CTDSP1  
DGCR8  
HLA-A  
PEPD  
PIP3-E  
PSG5  
SMCP  
ANXA13  
ARHGAP5  
CAPN7  
EN1  
PAX8  
PMS2L5  
SNX13  
USP1  
DRD4  
EFNA2  
NR1H4  
OBFC1  
PFTK1  
RALY  
ARL6IP1  
C18orf24  
CPNE1  
CTNBL1

CYP2E1  
G3BP2  
GOLGA2  
LTK  
PSMB2  
UBE1L2  
ARC  
BFSP2  
C10orf10  
CLIP3  
CYP3A43  
GPKOW  
GPR56  
HN1L  
IFT122  
LOC4951  
MYLC2PL  
STRAP  
TCL1B  
ABCA2  
ANXA3  
LOC390688  
MAPKBP1  
NAIP  
PAF1  
ZER1  
APEX2  
C13orf18  
GOLIM4  
IMMT  
MAPRE2  
NDN  
NOS1  
PACSIN3  
PHYHIP  
PMPCA  
SLC7A4  
TMEM140  
CITED2  
HDAC11  
SPTBN1  
XYLT1  
ZBTB43  
ATP6V0A4  
CDKN1B  
MYOM2  
OBP2A



TRGV3  
ZBTB7B  
GPR64  
NDST2  
NLGN1  
PIGQ  
PRB1  
VTCN1  
ACP5  
ADD2  
AHDC1  
BSG  
C17orf53  
CCDC69  
CENTA2  
FTSJ1  
HNF4G  
IPO8  
OLFM4  
SPATA5L1  
TAF12  
TRAF2  
ACP6  
CCR3  
DDX47  
DNASE1L2  
MDH2  
PCYT1B  
RCHY1  
SCRT1  
TAF10  
TBX6  
C4BPA  
FTCD  
GSTM4  
NAALAD2  
PEO1  
SEMA3F  
USO1

| blood vessel morphogenesis | vasculature development | regulation of cell differentiation |
|----------------------------|-------------------------|------------------------------------|
| GO:0048514                 | GO:0001944              | GO:0045595                         |
| AAMP                       | AAMP                    | ABCA1                              |
| ACVR1                      | ACTA2                   | ABCA5                              |
| ACVRL1                     | ACVR1                   | ABCG1                              |
| ADAM15                     | ACVR2B                  | ABL1                               |
| ADAM8                      | ACVRL1                  | ABL2                               |
| ADIPOR2                    | ADAM15                  | ACIN1                              |
| ADM                        | ADAM8                   | ACTN4                              |
| ADM2                       | ADAMTS6                 | ACVR1                              |
| AGGF1                      | ADIPOR2                 | ACVR1B                             |
| AIMP1                      | ADM                     | ACVR2A                             |
| AMOT                       | ADM2                    | ACVR2B                             |
| ANG                        | AGGF1                   | ACVRL1                             |
| ANGPT1                     | AHR                     | ADA                                |
| ANGPT2                     | AIMP1                   | ADAM8                              |
| ANGPT4                     | AKT1                    | ADAMTS1                            |
| ANGPTL3                    | ALDH1A2                 | ADAMTS12                           |
| ANGPTL4                    | AMOT                    | ADAMTS20                           |
| ANGPTL6                    | ANG                     | ADAMTS7                            |
| ANPEP                      | ANGPT1                  | ADAMTS9                            |
| ANXA2                      | ANGPT2                  | ADCY6                              |
| APOB                       | ANGPT4                  | ADCYAP1                            |
| APOD                       | ANGPTL3                 | ADIG                               |
| APOE                       | ANGPTL4                 | ADIPOQ                             |
| APOLD1                     | ANGPTL6                 | ADM                                |
| ARHGAP22                   | ANKRD17                 | ADNP                               |
| ARHGAP24                   | ANP32B                  | ADRA2B                             |
| ATP5B                      | ANPEP                   | ADRA2C                             |
| ATPIF1                     | ANXA2                   | AGER                               |
| B4GALT1                    | AP2B1                   | AGT                                |
| BAK1                       | APOB                    | AGTR1                              |
| BAX                        | APOD                    | AHI1                               |
| BCAS3                      | APOE                    | AKAP13                             |
| BMP4                       | APOLD1                  | AKAP5                              |
| BMPER                      | ARHGAP22                | AKAP6                              |
| C19orf10                   | ARHGAP24                | AKT1                               |
| C1GALT1                    | ARHGEF15                | ALOX12                             |
| CALCRL                     | ARID1A                  | ALOX15B                            |
| CAV1                       | ATP5B                   | ALX1                               |
| CCBE1                      | ATP7A                   | AMIGO1                             |
| CCL2                       | ATPIF1                  | ANAPC2                             |
| CCM2                       | B4GALT1                 | ANKRD1                             |
| CD34                       | B9D1                    | ANKRD17                            |
| CDC42                      | BAK1                    | ANKRD2                             |



|         |          |          |
|---------|----------|----------|
| CDH13   | BAX      | ANKRD27  |
| CDH2    | BCAS3    | ANKRD54  |
| CEACAM1 | BMP4     | ANP32B   |
| CHD7    | BMPER    | ANXA1    |
| CIB1    | BMPR2    | AP1AR    |
| CITED1  | C19orf10 | AP3B1    |
| CLIC4   | C1GALT1  | AP3D1    |
| COL15A1 | C5orf42  | APBB1    |
| COL18A1 | CALCA    | APC      |
| COL3A1  | CALCRL   | APC2     |
| COL4A1  | CAV1     | APCS     |
| COL4A2  | CCBE1    | APOA1    |
| COL8A1  | CCL2     | APOB     |
| COL8A2  | CCM2     | APOE     |
| CSPG4   | CD34     | APOLD1   |
| CTGF    | CDC42    | APP      |
| CTNNB1  | CDH13    | AQP3     |
| CUL7    | CDH2     | AR       |
| CX3CL1  | CDH5     | AREG     |
| CXCL17  | CDX2     | ARF1     |
| CXCR3   | CDX4     | ARF6     |
| CXCR7   | CEACAM1  | ARHGAP35 |
| CYP1B1  | CHD7     | ARHGAP4  |
| CYR61   | CIB1     | ARHGDIA  |
| DAB2IP  | CITED1   | ARHGEF1  |
| DLL1    | CLIC4    | ARHGEF2  |
| DLL4    | COL15A1  | ARHGEF7  |
| E2F7    | COL18A1  | ARNT     |
| E2F8    | COL1A1   | ARNTL    |
| ECM1    | COL1A2   | ARPC2    |
| ECSCR   | COL3A1   | ARSB     |
| EDN1    | COL4A1   | ASAP1    |
| EDNRA   | COL4A2   | ASB4     |
| EFNA1   | COL5A1   | ASCL1    |
| EFNB2   | COL8A1   | ASCL2    |
| EGF     | COL8A2   | ASPM     |
| EGFL7   | CRKL     | ASXL1    |
| EGR3    | CSPG4    | ASXL2    |
| EIF2AK3 | CTGF     | ATAT1    |
| ELK3    | CTNNB1   | ATF1     |
| ENG     | CUL7     | ATF5     |
| ENPEP   | CX3CL1   | ATOH1    |
| EPAS1   | CXCL17   | ATOH8    |
| EPGN    | CXCR3    | ATP11C   |
| EPHA1   | CXCR7    | ATP6AP1  |
| EPHA2   | CYP1B1   | ATP8A2   |
| EPHB1   | CYR61    | AURKA    |

|         |         |           |
|---------|---------|-----------|
| EPHB2   | DAB2IP  | AVIL      |
| EPHB3   | DCTN5   | AXIN1     |
| EPHB4   | DDIT3   | AXIN2     |
| ERAP1   | DHCR7   | AXL       |
| EREG    | DLL1    | B2M       |
| ESM1    | DLL4    | B4GALT1   |
| ETS1    | DLX3    | BAD       |
| ETV2    | DNM2    | BAG5      |
| EYA1    | DYNC2H1 | BAI3      |
| FAM105B | E2F7    | BAIAP2    |
| FAP     | E2F8    | BAMBI     |
| FGF1    | ECM1    | BARHL2    |
| FGF10   | ECSCR   | BAX       |
| FGF18   | EDN1    | BBS12     |
| FGF2    | EDNRA   | BCL11A    |
| FGF6    | EFNA1   | BCL11B    |
| FGF8    | EFNB2   | BCL2      |
| FGF9    | EGF     | BCL6      |
| FGFR1   | EGFL7   | BCL6B     |
| FGFR2   | EGR1    | BCL9L     |
| FIGF    | EGR3    | BDNF      |
| FLT1    | EIF2AK3 | BEND6     |
| FLT4    | ELK3    | BGLAP     |
| FMNL3   | ENG     | BHLHA15   |
| FN1     | ENPEP   | BHLHB9    |
| FOLR1   | EPAS1   | BHLHE41   |
| FOXC1   | EPC1    | BIN1      |
| FOXC2   | EPGN    | BIRC2     |
| FOXF1   | EPHA1   | BMP10     |
| FOXH1   | EPHA2   | BMP2      |
| FOXN1   | EPHB1   | BMP4      |
| FZD4    | EPHB2   | BMP5      |
| FZD5    | EPHB3   | BMP6      |
| FZD8    | EPHB4   | BMP7      |
| GBX2    | ERAP1   | BMPR1A    |
| GDF2    | EREG    | BMPR1B    |
| GJA1    | ERRFI1  | BMPR2     |
| GJA5    | ESM1    | BNIP2     |
| GJC1    | ESX1    | BOC       |
| GLMN    | ETS1    | BRAF      |
| GNA13   | ETV2    | BTC       |
| GPI     | EYA1    | BTG1      |
| GPLD1   | FAM105B | BTK       |
| GPR124  | FAP     | C10orf116 |
| GPR4    | FBXW7   | C10orf125 |
| GPR56   | FBXW8   | C10orf54  |
| GPX1    | FGF1    | C10orf58  |

|          |        |           |
|----------|--------|-----------|
| GREM1    | FGF10  | C11orf67  |
| HAND1    | FGF18  | C13orf15  |
| HAND2    | FGF2   | C13orf33  |
| HAS2     | FGF6   | C14orf169 |
| HDAC7    | FGF8   | C16orf45  |
| HEG1     | FGF9   | C18orf1   |
| HES1     | FGFR1  | C1QBP     |
| HEY1     | FGFR2  | C1QC      |
| HEY2     | FIGF   | C1QL4     |
| HHEX     | FLT1   | C1orf172  |
| HIF1A    | FLT4   | C1orf177  |
| HIF3A    | FLVCR1 | C1orf187  |
| HMOX1    | FMNL3  | C1orf9    |
| HOXA1    | FN1    | C20orf123 |
| HOXA3    | FOLR1  | C2orf28   |
| HOXA7    | FOSL1  | C3orf17   |
| HOXB13   | FOXC1  | C5orf13   |
| HOXB3    | FOXC2  | C6orf125  |
| HPGD     | FOXF1  | CA2       |
| HPSE     | FOXH1  | CACNA1A   |
| HRG      | FOXN1  | CALCA     |
| HS6ST1   | FOXO1  | CALR      |
| HSPG2    | FOXS1  | CAMK1     |
| HTATIP2  | FZD4   | CAMK1D    |
| ID1      | FZD5   | CAMK2B    |
| IL18     | FZD8   | CAMK4     |
| IL8      | GATA6  | CAPN3     |
| ITGA5    | GBX2   | CAPRIN1   |
| ITGAV    | GDF2   | CAPRIN2   |
| ITGB1    | GJA1   | CARD11    |
| ITGB1BP1 | GJA4   | CARM1     |
| ITGB3    | GJA5   | CARTPT    |
| JAG1     | GJC1   | CASP8     |
| JAM3     | GLI3   | CAV1      |
| JMJD6    | GLMN   | CAV3      |
| JUN      | GNA13  | CBFA2T2   |
| JUNB     | GPC3   | CCDC85B   |
| KDR      | GPI    | CCDC88A   |
| KLF5     | GPLD1  | CCL17     |
| KRIT1    | GPR124 | CCL19     |
| LAMA5    | GPR4   | CCL3      |
| LEF1     | GPR56  | CCL5      |
| LEP      | GPX1   | CCND1     |
| LEPR     | GREM1  | CCNE1     |
| LOXL2    | HAND1  | CCNT2     |
| LRP1     | HAND2  | CCR1      |
| LRP5     | HAS2   | CCR2      |



|        |          |          |
|--------|----------|----------|
| MAPK14 | HDAC7    | CCRN4L   |
| MCAM   | HEG1     | CD101    |
| MED1   | HES1     | CD109    |
| MEIS1  | HEY1     | CD2      |
| MEOX2  | HEY2     | CD24     |
| MFGE8  | HHEX     | CD27     |
| MMP14  | HIF1A    | CD276    |
| MMP19  | HIF3A    | CD28     |
| MMP2   | HMOX1    | CD34     |
| MMRN2  | HOXA1    | CD36     |
| MYH9   | HOXA3    | CD46     |
| MYLK   | HOXA7    | CD53     |
| MYO1E  | HOXB13   | CD74     |
| MYOCD  | HOXB3    | CD80     |
| NAA15  | HPGD     | CD83     |
| NCL    | HPSE     | CD86     |
| NDNF   | HRG      | CDC20    |
| NEDD4  | HS6ST1   | CDC42    |
| NF1    | HSPG2    | CDC73    |
| NFATC4 | HTATIP2  | CDH15    |
| NKX2-5 | ID1      | CDH2     |
| NOS3   | IL18     | CDH4     |
| NOTCH1 | IL8      | CDH5     |
| NOTCH3 | IMMP2L   | CDK1     |
| NOTCH4 | ITGA5    | CDK5     |
| NOV    | ITGAV    | CDK5R1   |
| NOX1   | ITGB1    | CDK5RAP1 |
| NOX5   | ITGB1BP1 | CDK5RAP2 |
| NPRL3  | ITGB3    | CDK5RAP3 |
| NR2F2  | ITGB8    | CDK6     |
| NR4A1  | JAG1     | CDK9     |
| NRARP  | JAM3     | CDKL5    |
| NRCAM  | JMJD6    | CDKN2A   |
| NRP1   | JUN      | CDON     |
| NRP2   | JUNB     | CDX2     |
| NRXN1  | KDR      | CEACAM5  |
| NRXN3  | KLF5     | CEBPA    |
| NTRK2  | KRIT1    | CEBPB    |
| NUS1   | LAMA5    | CELA1    |
| OVOL2  | LEF1     | CERS2    |
| PARVA  | LEP      | CETP     |
| PAXIP1 | LEPR     | CFL1     |
| PDCD10 | LIF      | CFLAR    |
| PDCD6  | LOX      | CHADL    |
| PDCL3  | LOXL1    | CHD7     |
| PDE3B  | LOXL2    | CHN1     |
| PDGFA  | LRP1     | CHODL    |

|         |        |        |
|---------|--------|--------|
| PDGFRA  | LRP2   | CHRD   |
| PDGFRB  | LRP5   | CHRNA3 |
| PGF     | LTBP1  | CHRN2  |
| PIK3CA  | LUZP1  | CIB1   |
| PIK3CB  | LYL1   | CITED1 |
| PIK3CG  | MAP2K1 | CLASP1 |
| PIK3R6  | MAP3K3 | CLASP2 |
| PITX2   | MAPK1  | CLCF1  |
| PKD2    | MAPK14 | CLDN18 |
| PKNOX1  | MCAM   | CLDN5  |
| PLAU    | MDM2   | CLIC1  |
| PLCD1   | MED1   | CLOCK  |
| PLCD3   | MEF2C  | CLPTM1 |
| PLXDC1  | MEGF8  | CLU    |
| PLXND1  | MEIS1  | CMKLR1 |
| PNPLA6  | MEOX2  | CMTM5  |
| POFUT1  | MESP1  | CNOT1  |
| PRCP    | MFGE8  | CNOT2  |
| PRDM1   | MIB1   | CNOT3  |
| PRKCA   | MMP14  | CNR1   |
| PRKD1   | MMP19  | CNTF   |
| PRKD2   | MMP2   | CNTN1  |
| PRKX    | MMP21  | CNTN2  |
| PROK1   | MMRN2  | CNTN4  |
| PROK2   | MYH10  | COBL   |
| PROX1   | MYH9   | COL1A1 |
| PRRX1   | MYLK   | COL3A1 |
| PTEN    | MYO1E  | COL5A1 |
| PTGER4  | MYOCD  | COL5A2 |
| PTGS2   | NAA15  | CORO1C |
| PTK2    | NCL    | CPEB1  |
| PTK2B   | NDNF   | CPEB3  |
| PTPRB   | NDP    | CPNE1  |
| QKI     | NDST1  | CPNE5  |
| RAMP1   | NEDD4  | CPNE6  |
| RAMP2   | NF1    | CPNE9  |
| RAPGEF3 | NFATC4 | CRABP2 |
| RASA1   | NKX2-5 | CRB2   |
| RASIP1  | NKX3-1 | CREB1  |
| RBM15   | NODAL  | CREBL2 |
| RBPJ    | NOS3   | CRMP1  |
| RHOB    | NOTCH1 | CRP    |
| RNF213  | NOTCH3 | CRTC1  |
| ROBO1   | NOTCH4 | CRX    |
| ROBO4   | NOV    | CSF1   |
| RORA    | NOX1   | CSF1R  |
| RSPO3   | NOX5   | CSF2   |

|          |        |          |
|----------|--------|----------|
| S100A7   | NPRL3  | CSF3     |
| S1PR1    | NR2F2  | CSF3R    |
| SAT1     | NR4A1  | CSRP3    |
| SCG2     | NRARP  | CTDP1    |
| SEC24B   | NRCAM  | CTDSP1   |
| SEMA3E   | NRP1   | CTGF     |
| SEMA4A   | NRP2   | CTH      |
| SEMA5A   | NRXN1  | CTHRC1   |
| SERPINE1 | NRXN3  | CTLA4    |
| SERPINF2 | NSDHL  | CTNNA1   |
| SETD2    | NTRK2  | CTNNA2   |
| SFRP2    | NUS1   | CTNNB1   |
| SGPL1    | OSR1   | CTNNBIP1 |
| SH2D2A   | OVOL2  | CTR9     |
| SHB      | PARVA  | CTTN     |
| SHC1     | PAX6   | CUL4A    |
| SHH      | PAXIP1 | CUL7     |
| SIRT1    | PCSK5  | CUX1     |
| SIX1     | PDCD10 | CUX2     |
| SLC12A6  | PDCD6  | CX3CL1   |
| SLIT2    | PDCL3  | CX3CR1   |
| SMAD7    | PDE3B  | CXCL10   |
| SMO      | PDGFA  | CXCL12   |
| SOS1     | PDGFB  | CXCL14   |
| SOX17    | PDGFRA | CXCL9    |
| SOX18    | PDGFRB | CXCR4    |
| SOX4     | PDPN   | CYB5D2   |
| SPI1     | PECAM1 | CYLD     |
| SRF      | PGF    | CYP26B1  |
| SRPK2    | PIK3CA | CYP27B1  |
| SRPX2    | PIK3CB | CYR61    |
| STAB2    | PIK3CG | DAB1     |
| STK4     | PIK3R6 | DAB2     |
| STRA6    | PITX2  | DAB2IP   |
| SYK      | PKD1   | DACT3    |
| T        | PKD2   | DAG1     |
| TAL1     | PKNOX1 | DAXX     |
| TBX1     | PLAU   | DBC1     |
| TBX2     | PLCD1  | DBN1     |
| TBX20    | PLCD3  | DCC      |
| TBX4     | PLXDC1 | DCT      |
| TBX5     | PLXND1 | DDIT3    |
| TCF21    | PNPLA6 | DDR2     |
| TDGF1    | POFUT1 | DDX17    |
| TEK      | PPAP2B | DDX39B   |
| TFAP2B   | PPP3CB | DDX5     |
| TGFB2    | PRCP   | DDX6     |



|           |          |         |
|-----------|----------|---------|
| TGFBI     | PRDM1    | DGUOK   |
| TGFBR1    | PRICKLE1 | DICER1  |
| TGFBR2    | PRKCA    | DISC1   |
| THBS1     | PRKD1    | DIXDC1  |
| THSD7A    | PRKD2    | DKK1    |
| THY1      | PRKX     | DKKL1   |
| TIE1      | PROK1    | DLK2    |
| TIPARP    | PROK2    | DLL1    |
| TMEM100   | PROP1    | DLL3    |
| TMPRSS6   | PROX1    | DLL4    |
| TNFAIP2   | PRRX1    | DLX1    |
| TNFRSF12A | PSEN1    | DLX2    |
| TNFSF12   | PTEN     | DLX5    |
| TNNI3     | PTGER4   | DMD     |
| TSPAN12   | PTGS2    | DMPK    |
| TYMP      | PTK2     | DMRTA2  |
| UBP1      | PTK2B    | DNM2    |
| UNC5B     | PTK7     | DNM3    |
| VASH1     | PTPN14   | DNMT3B  |
| VAV2      | PTPRB    | DOCK7   |
| VAV3      | QKI      | DPYSL2  |
| VEGFA     | RAMP1    | DPYSL3  |
| VEGFB     | RAMP2    | DRD2    |
| VEGFC     | RAPGEF1  | DRD3    |
| VEZF1     | RAPGEF2  | DSCAM   |
| WARS      | RAPGEF3  | DTX1    |
| WARS2     | RASA1    | DUOXA1  |
| WASF2     | RASIP1   | DUSP10  |
| WNT11     | RBM15    | DUSP6   |
| WNT7A     | RBPJ     | DVL1    |
| WNT7B     | RECK     | DYNLT1  |
| WT1       | RHOB     | E2F1    |
| XBP1      | RHOJ     | ECT2    |
| YAP1      | RIC8A    | EDN1    |
| ZC3H12A   | RNF213   | EDN3    |
| ZFP36L1   | ROBO1    | EDNRB   |
| ZFPM2     | ROBO4    | EEF2K   |
| ZMIZ1     | ROM1     | EFEMP1  |
| ZNF304    | RORA     | EFNA1   |
|           | RSPO3    | EFNA5   |
|           | S100A7   | EFNB2   |
|           | S1PR1    | EGR3    |
|           | SAT1     | EHD1    |
|           | SCG2     | EHD2    |
|           | SEC24B   | EIF2AK2 |
|           | SEMA3C   | EIF2AK4 |
|           | SEMA3E   | EIF4E   |

|          |           |
|----------|-----------|
| SEMA4A   | EIF4ENIF1 |
| SEMA5A   | EIF4G1    |
| SERPINE1 | ELAVL1    |
| SERPINF2 | ELF5      |
| SETD2    | ELL3      |
| SFRP2    | EMP2      |
| SGCB     | EMX1      |
| SGPL1    | ENC1      |
| SH2D2A   | ENPP1     |
| SHB      | EOMES     |
| SHC1     | EP300     |
| SHH      | EPB41L5   |
| SIRT1    | EPB49     |
| SIX1     | EPHA3     |
| SLC12A6  | EPHA4     |
| SLIT2    | EPHA7     |
| SMAD6    | EPHB2     |
| SMAD7    | EPHB3     |
| SMO      | EPO       |
| SNX17    | EPOR      |
| SOCS3    | EPYC      |
| SOS1     | ERBB2     |
| SOX17    | ERBB4     |
| SOX18    | EREG      |
| SOX4     | ERRFI1    |
| SPHK1    | ESRRA     |
| SPHK2    | ETS1      |
| SPI1     | ETV2      |
| SPINT1   | ETV5      |
| SRF      | EYA1      |
| SRPK2    | EZH2      |
| SRPX2    | F2        |
| STAB2    | FADD      |
| STK11    | FADS1     |
| STK4     | FAM101A   |
| STRA6    | FAM101B   |
| SUFU     | FAM134C   |
| SYK      | FAM195B   |
| T        | FAM20C    |
| TAB1     | FAM21C    |
| TAL1     | FAM57B    |
| TBX1     | FAM5B     |
| TBX2     | FAM5C     |
| TBX20    | FAS       |
| TBX3     | FAT4      |
| TBX4     | FBLN1     |
| TBX5     | FBN2      |

|           |        |
|-----------|--------|
| TCF21     | FBXO22 |
| TCF7L2    | FBXO31 |
| TDGF1     | FBXO38 |
| TEK       | FBXO7  |
| TFAP2B    | FBXW8  |
| TGFB2     | FERD3L |
| TGFBI     | FES    |
| TGFBR1    | FEZ1   |
| TGFBR2    | FEZF1  |
| THBS1     | FEZF2  |
| THSD7A    | FGA    |
| THY1      | FGB    |
| TIE1      | FGF10  |
| TIPARP    | FGF13  |
| TMED2     | FGF18  |
| TMEM100   | FGF2   |
| TMEM204   | FGF23  |
| TMPRSS6   | FGF9   |
| TNFAIP2   | FGFR1  |
| TNFRSF12A | FGFR2  |
| TNFSF12   | FGG    |
| TNNI3     | FIG4   |
| TSPAN12   | FKBP1B |
| TYMP      | FKBP4  |
| UBP1      | FLCN   |
| UNC5B     | FLNA   |
| VASH1     | FLOT1  |
| VAV2      | FLOT2  |
| VAV3      | FLRT2  |
| VEGFA     | FLT3LG |
| VEGFB     | FMOD   |
| VEGFC     | FMR1   |
| VEZF1     | FN1    |
| WARS      | FNDC5  |
| WARS2     | FNIP1  |
| WASF2     | FOS    |
| WNT11     | FOXA1  |
| WNT2      | FOXA2  |
| WNT7A     | FOXC1  |
| WNT7B     | FOXC2  |
| WT1       | FOXE3  |
| XBP1      | FOXF1  |
| YAP1      | FOXJ1  |
| ZC3H12A   | FOXN1  |
| ZFAND5    | FOXO1  |
| ZFP161    | FOXO3  |
| ZFP36L1   | FOXO4  |

|        |        |
|--------|--------|
| ZFPM2  | FOXO6  |
| ZMIZ1  | FOXP1  |
| ZNF304 | FOXP3  |
|        | FRMD7  |
|        | FRZB   |
|        | FSHB   |
|        | FSHR   |
|        | FSTL3  |
|        | FSTL4  |
|        | FTO    |
|        | FUZ    |
|        | FYN    |
|        | FZD1   |
|        | FZD3   |
|        | FZD7   |
|        | GABPA  |
|        | GAK    |
|        | GAL    |
|        | GAS2L1 |
|        | GAS6   |
|        | GATA1  |
|        | GATA2  |
|        | GATA3  |
|        | GATA4  |
|        | GATA6  |
|        | GBP1   |
|        | GCNT2  |
|        | GDF10  |
|        | GDF11  |
|        | GDF15  |
|        | GDF2   |
|        | GDF3   |
|        | GDF5   |
|        | GDF6   |
|        | GDF7   |
|        | GDI1   |
|        | GDNF   |
|        | GDPD5  |
|        | GFAP   |
|        | GFI1   |
|        | GJA1   |
|        | GLG1   |
|        | GLI1   |
|        | GLI2   |
|        | GLI3   |
|        | GLIPR2 |
|        | GNA11  |



GNAQ  
GNAS  
GNRH1  
GOLGA4  
GORASP1  
GPC1  
GPER  
GPR124  
GPR171  
GPR173  
GPR37L1  
GPR55  
GPR56  
GPR68  
GPR98  
GPC5B  
GREM1  
GRHL2  
GRID2  
GRIN1  
GRN  
GSK3A  
GSK3B  
GSX2  
H1FOO  
H2AFY  
H2AFY2  
HAND2  
HAP1  
HAS2  
HAX1  
HCLS1  
HDAC1  
HDAC2  
HDAC3  
HDAC4  
HDAC5  
HDAC6  
HDAC7  
HDAC9  
HEMGN  
HES1  
HES3  
HES5  
HEY1  
HEY2  
HEYL

HGF  
HIF1A  
HIF1AN  
HIST1H4A  
HIST1H4B  
HIST1H4C  
HIST1H4D  
HIST1H4E  
HIST1H4F  
HIST1H4H  
HIST1H4I  
HIST1H4J  
HIST1H4K  
HIST1H4L  
HIST2H4A  
HIST2H4B  
HIST4H4  
HLA-B  
HLA-DOA  
HLA-G  
HLX  
HMG20A  
HMG20B  
HMGA2  
HMGB1  
HMGB2  
HMGB3  
HNF1B  
HNRNPK  
HOOK3  
HOPX  
HOXA11  
HOXA2  
HOXA5  
HOXA7  
HOXA9  
HOXB3  
HOXB4  
HOXB8  
HOXD3  
HPN  
HSF4  
HTR2A  
HTR2C  
IAPP  
ID1  
ID2

ID3  
ID4  
IFITM1  
IFNA2  
IFNB1  
IFNG  
IFRD1  
IGF1  
IGFBP3  
IGFBP5  
IHH  
IKBKB  
IKZF3  
IL12A  
IL12B  
IL12RB1  
IL13  
IL15  
IL17A  
IL18  
IL1B  
IL1RAPL1  
IL1RL2  
IL2  
IL20  
IL23A  
IL23R  
IL27  
IL29  
IL2RA  
IL3  
IL34  
IL36B  
IL4  
IL4R  
IL5  
IL6  
IL6R  
IL6ST  
IL7  
IL7R  
ILK  
IMPACT  
INHA  
INHBA  
INPP5D  
INPP5E

INPP5F  
INPP5J  
INS  
INSIG1  
INSM1  
IQCB1  
IRF1  
IRF4  
IRF7  
IRX3  
ISG15  
ISL1  
ISL2  
ISLR2  
IST1  
ITGA3  
ITGAV  
ITGB1  
ITGB1BP1  
ITGB1BP3  
ITGB3  
ITM2C  
ITPKA  
ITPKB  
ITSN2  
JAG1  
JAK2  
JAK3  
JDP2  
JUN  
JUNB  
JUND  
KANK1  
KAT2B  
KATNA1  
KATNB1  
KBTBD10  
KCTD11  
KDM1A  
KDM2B  
KDM3A  
KDR  
KEAP1  
KEL  
KIAA0319  
KIAA0748  
KIAA0922



KIAA1109  
KIAA1598  
KIAA1715  
KIDINS220  
KIF13B  
KIF14  
KIF20B  
KIT  
KITLG  
KLF10  
KLF13  
KLF4  
KLF5  
KLK6  
KLK8  
KNDC1  
KRAS  
KRT36  
KRT84  
L1CAM  
L3MBTL1  
LBX1  
LDB1  
LEF1  
LEO1  
LEP  
LGALS1  
LGALS12  
LGALS3  
LGALS9  
LHX1  
LIF  
LIG4  
LILRB1  
LILRB2  
LILRB3  
LILRB4  
LIMD1  
LIMK1  
LIMS1  
LIN28A  
LINGO1  
LMNA  
LMO3  
LMO4  
LMX1A  
LOC100507050

LOXL2  
LPAR1  
LPAR3  
LPL  
LPPR5  
LRP1  
LRP4  
LRP5  
LRP8  
LRRC16A  
LRRC17  
LRRC4C  
LRRC7  
LRRK2  
LSM1  
LTA  
LTBP3  
LTBP4  
LTF  
LTK  
LYN  
LZTS1  
MACF1  
MAD2L2  
MAF  
MAFB  
MAFF  
MAFG  
MAG  
MAGI2  
MAML1  
MAMSTR  
MAN2A1  
MAP1B  
MAP2K1  
MAP2K2  
MAP3K5  
MAPK1  
MAPK11  
MAPK12  
MAPK14  
MAPK9  
MAPT  
MARCKS  
MARK2  
MBD1  
MBNL3

MBP  
MECP2  
MED1  
MED28  
MEF2A  
MEF2C  
MEGF10  
MEGF8  
MEIS1  
MEIS2  
MEN1  
MESP1  
METRN  
METRNL  
MEX3C  
MFI2  
MIB1  
MITF  
MIXL1  
MLL5  
MMD  
MMD2  
MMP11  
MMP14  
MOB2  
MORF4L2  
MSR1  
MST4  
MSTN  
MSX1  
MSX2  
MT3  
MTOR  
MUL1  
MUTED  
MYADM  
MYB  
MYC  
MYCL1  
MYCN  
MYF5  
MYF6  
MYLK3  
MYOC  
MYOCD  
MYOD1  
MYOG

N4BP2L2  
NACA  
NANOG  
NAP1L2  
NBL1  
NBR1  
NCKAP1L  
NCKIPSD  
NCOA1  
NCOA3  
NCS1  
NDEL1  
NDFIP1  
NDNF  
NDRG4  
NEDD4  
NEDD4L  
NEFL  
NEGR1  
NEK5  
NELF  
NELL1  
NET1  
NEU1  
NEU2  
NEURL  
NEUROD1  
NEUROD2  
NEUROD4  
NEUROG1  
NEUROG3  
NF1  
NF2  
NFAM1  
NFATC2  
NFATC4  
NFE2L2  
NFKB1  
NFKBIA  
NFKBID  
NGEF  
NGF  
NGFR  
NKAP  
NKX2-1  
NKX2-2  
NKX2-5

NKX3-2  
NKX6-1  
NKX6-2  
NKX6-3  
NLGN1  
NLGN3  
NLN  
NLRP3  
NME1  
NME2  
NODAL  
NOG  
NOS1  
NOTCH1  
NOTCH3  
NOTCH4  
NOV  
NPHP3  
NPNT  
NPPC  
NPR2  
NPTN  
NROB1  
NR1D1  
NR1D2  
NR1H2  
NR1H3  
NR2C2  
NR2E1  
NRARP  
NRCAM  
NRG1  
NRG3  
NRP1  
NTF3  
NTF4  
NTN1  
NTRK1  
NTRK2  
NTRK3  
NUMB  
NUMBL  
OBSL1  
ODZ3  
ODZ4  
OGN  
OGT



OLFM1  
OLFM2  
OLFM4  
OLIG2  
OMG  
OPA1  
OPRM1  
OSR1  
OSTN  
OTP  
OVOL2  
P2RY12  
P2RY2  
P4HTM  
PA2G4  
PACSIN1  
PAF1  
PAFAH1B1  
PAK3  
PALM  
PAQR3  
PARK2  
PAX2  
PAX4  
PAX6  
PAX7  
PAX8  
PBLD  
PBX1  
PCID2  
PCM1  
PCP4  
PDCD2  
PDCD4  
PDE3A  
PDE5A  
PDGFB  
PDGFRA  
PDLIM5  
PDLIM7  
PER2  
PF4  
PGLYRP1  
PGLYRP2  
PGLYRP3  
PHLDB1  
PHLDB2

PHOX2B  
PIAS2  
PIK3R1  
PIK3R6  
PIN1  
PKDCC  
PKP2  
PLA2G10  
PLA2G2A  
PLAG1  
PLCB1  
PLDN  
PLEKHB1  
PLK2  
PLK5  
PLXNA1  
PLXNA2  
PLXNA3  
PLXNA4  
PLXNB1  
PLXNB2  
PLXNB3  
PLXNC1  
PLXND1  
PML  
PMP22  
PNP  
POFUT2  
POR  
POSTN  
POU3F2  
POU4F1  
POU4F2  
POU5F1  
PPAPDC3  
PPARA  
PPARD  
PPARG  
PPARGC1B  
PPP1R12A  
PPP1R13L  
PPP1R9A  
PPP2CA  
PPP2R1A  
PPP2R3C  
PPP2R5B  
PPP3CA

PQBP1  
PRAME  
PRAMEF1  
PRAMEF10  
PRAMEF11  
PRAMEF12  
PRAMEF15  
PRAMEF17  
PRAMEF19  
PRAMEF2  
PRAMEF20  
PRAMEF22  
PRAMEF25  
PRAMEF4  
PRAMEF5  
PRAMEF6  
PRAMEF7  
PRAMEF8  
PRAMEF9  
PRDM1  
PRDM16  
PRDM6  
PRELID1  
PREX1  
PRICKLE1  
PRKACA  
PRKCA  
PRKCH  
PRKCI  
PRKCZ  
PRKD1  
PRKX  
PRLR  
PRMT1  
PRMT5  
PROC  
PROM1  
PROX1  
PRPF19  
PRRX1  
PSEN1  
PTBP1  
PTCH1  
PTCH2  
PTCHD2  
PTEN  
PTGER3

PTGER4  
PTGS2  
PTHLH  
PTK2  
PTK2B  
PTK6  
PTK7  
PTN  
PTPN2  
PTPN5  
PTPN6  
PTPRD  
PTPRF  
PTPRO  
PTPRQ  
PTPRZ1  
PURB  
RAB11A  
RAB17  
RAB21  
RAB7B  
RAB7L1  
RAC1  
RAC3  
RAF1  
RAG1  
RAMP2  
RAP1A  
RAP1GAP  
RAP1GAP2  
RAP2A  
RAPGEF1  
RAPGEF2  
RARA  
RARB  
RARG  
RARRES2  
RASAL1  
RASGRP1  
RASSF2  
RB1  
RBFOX2  
RBM15  
RBM24  
RBM38  
RBM4  
RBPJ

RC3H1  
RCC2  
REG3A  
REG3G  
RELA  
RELN  
REST  
RET  
RFX3  
RGS14  
RHEB  
RHOA  
RIMS1  
RIMS2  
RIPK1  
RIPK2  
RLTPR  
RND2  
RNF10  
RNF112  
RNF41  
RNF6  
ROBO1  
ROBO2  
ROCK1  
ROCK2  
ROD1  
RORA  
RORB  
RORC  
RPS19  
RPS6KA1  
RPS6KA3  
RREB1  
RRN3  
RTN4  
RTN4R  
RUFY3  
RUNX1  
RUNX1T1  
RUNX2  
RUNX3  
S100A10  
S100B  
S1PR2  
S1PR3  
S1PR5



SARM1  
SART1  
SASH3  
SAV1  
SCARF1  
SCGB3A1  
SCIN  
SCN1B  
SCRT1  
SCRT2  
SDC2  
SDCBP  
SDHAF2  
SDK1  
SEMA3A  
SEMA3B  
SEMA3C  
SEMA3D  
SEMA3E  
SEMA3F  
SEMA3G  
SEMA4A  
SEMA4B  
SEMA4C  
SEMA4D  
SEMA4F  
SEMA4G  
SEMA5A  
SEMA5B  
SEMA6A  
SEMA6B  
SEMA6C  
SEMA6D  
SEMA7A  
SENP1  
SERPINB3  
SERPINE2  
SERPINF1  
SERPINF2  
SETD3  
SETX  
SEZ6  
SF3A2  
SFN  
SFRP1  
SFRP2  
SFRP4

SGK1  
SH3PXD2B  
SHANK1  
SHANK3  
SHH  
SHOX2  
SIGLEC15  
SIK1  
SIPA1L1  
SIRT1  
SIRT2  
SIX1  
SIX2  
SIX3  
SIX4  
SKI  
SKIL  
SLC39A12  
SLC45A3  
SLC46A2  
SLC6A4  
SLC9B2  
SLIT1  
SLIT2  
SLIT3  
SMAD1  
SMAD2  
SMAD3  
SMAD4  
SMAD5  
SMAD7  
SMAP1  
SMARCD3  
SMO  
SMOC1  
SMURF1  
SMYD1  
SNAI1  
SNAI2  
SNAP25  
SNAPIN  
SNW1  
SNX3  
SOCS3  
SOCS5  
SOD1  
SORL1

SORT1  
SOS1  
SOSTDC1  
SOX10  
SOX11  
SOX13  
SOX14  
SOX17  
SOX2  
SOX3  
SOX5  
SOX6  
SOX8  
SOX9  
SP7  
SPAG9  
SPDEF  
SPEN  
SPG20  
SPHK1  
SPI1  
SPINK5  
SPINT1  
SPOCK1  
SPOCK2  
SPP1  
SPRY2  
SRCIN1  
SRF  
SRGAP2  
SRGAP2P1  
SRRT  
SRSF6  
SS18L1  
SSH1  
SSH2  
SSH3  
ST6GAL1  
STAP1  
STAR  
STAT1  
STAT3  
STAT5B  
STK11  
STK24  
STK25  
STK3

STK4  
STMN2  
STRAP  
SUFU  
SULT1E1  
SUPT6H  
SUZ12  
SYK  
SYNGAP1  
SYT1  
SYT14L  
SYT17  
SYT2  
SYT3  
SYT4  
TACSTD2  
TAF8  
TAL1  
TBR1  
TBX1  
TBX19  
TBX3  
TBX5  
TBX6  
TCF12  
TCF3  
TCF4  
TCF7L2  
TCFL5  
TESC  
TFAP2A  
TFAP2B  
TFE3  
TGFB1  
TGFB111  
TGFB2  
TGFB3  
TGFB11  
TGFB2  
TGIF2  
THPO  
THRA  
THY1  
TIAM1  
TIMP2  
TJP2  
TLE6

TLR3  
TLR4  
TLX2  
TLX3  
TM7SF4  
TMEM100  
TMEM119  
TMEM176A  
TMEM176B  
TMEM178  
TMEM30A  
TMEM64  
TNF  
TNFRSF12A  
TNFRSF1A  
TNFRSF21  
TNFSF11  
TNFSF14  
TNFSF18  
TNFSF4  
TNFSF9  
TNIK  
TNR  
TOB1  
TOB2  
TP63  
TP73  
TPH1  
TRAF6  
TRIB1  
TRIB2  
TRIB3  
TRIM11  
TRIM16  
TRIM32  
TRIM6  
TRIM62  
TRIM67  
TRIM72  
TRIOBP  
TRPC6  
TRPM4  
TRPS1  
TRPV2  
TRPV4  
TSPO  
TTL

TTPA  
TWF2  
TWIST1  
TWIST2  
TWSG1  
TYROBP  
UBASH3B  
UBE2V2  
UCMA  
UFL1  
ULK2  
ULK4  
UNC13A  
UNC13D  
UNC5D  
UNCX  
USH2A  
UST  
UTS2  
VAMP7  
VASN  
VAX1  
VDR  
VEGFA  
VEGFC  
VHL  
VIM  
VLDLR  
VNN1  
VWC2  
VWC2L  
WDFY2  
WDR1  
WDR36  
WDR61  
WEE2  
WIF1  
WNT1  
WNT10B  
WNT2  
WNT3  
WNT3A  
WNT4  
WNT5A  
WNT5B  
WNT7A  
WNT7B



WNT9A  
WNT9B  
WWTR1  
XBP1  
XDH  
XK  
XRCC2  
XRCC5  
YAP1  
YWHAG  
YWHAH  
ZAP70  
ZBTB1  
ZBTB16  
ZBTB46  
ZBTB7A  
ZBTB7C  
ZC3H12A  
ZC3H8  
ZEB1  
ZEB2  
ZFHX3  
ZFP36L2  
ZFPM1  
ZFPM2  
ZHX2  
ZHX3  
ZMYND8  
ZNF16  
ZNF268  
ZNF335  
ZNF385A  
ZNF488  
ZNF536  
ZNF664-FAM101A  
ZNF675  
ZNF703  
ZNF706  
ZSWIM6

| regulation of lymphocyte activation | T cell receptor signaling pathway | lymphocyte costimulation |
|-------------------------------------|-----------------------------------|--------------------------|
| GO:0051249                          | GO:0050852                        | GO:0031294               |
| PIK3R1                              | PDE4D                             | PIK3R1                   |
| TNFAIP8L2                           | PIK3R1                            | CD86                     |
| BTNL2                               | BTNL2                             | PAK2                     |
| PARP3                               | PDE4B                             |                          |
| TYROBP                              | PAK2                              |                          |
| CD86                                | HLA-DRB4                          |                          |
| IL4                                 |                                   |                          |
| TNFSF13                             |                                   |                          |
| FGL1                                |                                   |                          |
| ZBTB1                               |                                   |                          |
| PAK2                                |                                   |                          |
| IL2ORB                              |                                   |                          |







































































| regulation of immune response | immune system process | positive regulation of natural killer cell mediated immune response to tumor cell |
|-------------------------------|-----------------------|-----------------------------------------------------------------------------------|
| GO:0050776                    | GO:0002376            | GO:0002857                                                                        |
| UFD1L                         | CHI3L1                | PVR                                                                               |
| GAL                           | SAR1B                 | PVRL2                                                                             |
| PSMC4                         | PRTN3                 |                                                                                   |
| RELB                          | SYNCRIP               |                                                                                   |
| CACNB3                        | PDZD11                |                                                                                   |
| CYFIP1                        | SPACA3                |                                                                                   |
| DENND1B                       | IRF2                  |                                                                                   |
| LAMP1                         | PSMC4                 |                                                                                   |
| PSMA6                         | MAGT1                 |                                                                                   |
| IL27RA                        | RELB                  |                                                                                   |
| CD80                          | HDAC9                 |                                                                                   |
| MAD2L2                        | CUL4A                 |                                                                                   |
| PVR                           | CACNB3                |                                                                                   |
| IRAK2                         | CYFIP1                |                                                                                   |
| PSMD10                        | DENND1B               |                                                                                   |
| KLRC1                         | MX1                   |                                                                                   |
| ENPP3                         | ORMDL3                |                                                                                   |
| PSMD8                         | LAMP1                 |                                                                                   |
| CMKLR1                        | IFI44L                |                                                                                   |
| RC3H2                         | SLC37A4               |                                                                                   |
| NRAS                          | GDI2                  |                                                                                   |
| PSMA2                         | TNFSF15               |                                                                                   |
| SYK                           | EXOSC4                |                                                                                   |
| HEXIM1                        | PSMA6                 |                                                                                   |
| RBM14                         | TMEM14C               |                                                                                   |
| C20orf196                     | IL27RA                |                                                                                   |
| SYK                           | CAPZA1                |                                                                                   |
| STAT6                         | NDUFC2                |                                                                                   |
| WIPF2                         | RPL30                 |                                                                                   |
| PSMA5                         | SEC22B                |                                                                                   |
|                               | SAA1                  |                                                                                   |
|                               | CD80                  |                                                                                   |
|                               | CD320                 |                                                                                   |
|                               | MPEG1                 |                                                                                   |
|                               | PMS2L1                |                                                                                   |
|                               | PRDX4                 |                                                                                   |
|                               | IRAK2                 |                                                                                   |
|                               | AP2A2                 |                                                                                   |
|                               | PSMD10                |                                                                                   |
|                               | RAB7A                 |                                                                                   |
|                               | CPNE3                 |                                                                                   |
|                               | ENPP3                 |                                                                                   |
|                               | F11R                  |                                                                                   |

PSMD8  
APP  
CMKLR1  
CCT8  
RC3H2  
CSF2  
NRAS  
PRG2  
PSMA2  
PAFAH1B2  
SYK  
CCR9  
PRDX3  
C6orf57  
IFI44  
POU1F1  
QPCT  
IGF2R  
CKLF  
HEXIM1  
RBM14  
VCP  
NUDCD1  
RAB5B  
PMS2L2  
GGH  
PRG2  
IFNA16  
SYK  
STAT6  
WIPF2  
BLNK  
PSMA5  
SEC13  
SEMA3C  
BPI  
CST7  
ITGAV  
CCL27





































































| humoral immune response | positive regulation of T cell activation | mitotic spindle |
|-------------------------|------------------------------------------|-----------------|
| GO:0006959              | GO:0050870                               | GO:0072686      |
| PRTN3                   | CD80                                     | ABI1            |
| PDZD11                  | SYK                                      | ABL1            |
| RPL30                   |                                          | ABR             |
| IFNA16                  |                                          | ACTN4           |
| BLNK                    |                                          | AKAP13          |
| BPI                     |                                          | ALMS1           |
|                         |                                          | ALS2            |
|                         |                                          | ANLN            |
|                         |                                          | APC             |
|                         |                                          | ARAP3           |
|                         |                                          | ARF6            |
|                         |                                          | ARFGEF1         |
|                         |                                          | ARFIP2          |
|                         |                                          | ARHGAP10        |
|                         |                                          | ARHGAP27        |
|                         |                                          | ARHGAP29        |
|                         |                                          | ARHGAP4         |
|                         |                                          | ARHGAP5         |
|                         |                                          | ARHGDI1         |
|                         |                                          | ARHGDI2         |
|                         |                                          | ARHGDI3         |
|                         |                                          | ARHGDI4         |
|                         |                                          | ARHGDI5         |
|                         |                                          | ARHGDI6         |
|                         |                                          | ARHGDI7         |
|                         |                                          | ARHGDI8         |
|                         |                                          | ARHGDI9         |
|                         |                                          | ARHGDI10        |
|                         |                                          | ARHGDI11        |
|                         |                                          | ARHGDI12        |
|                         |                                          | ARHGDI13        |
|                         |                                          | ARHGDI14        |
|                         |                                          | ARHGDI15        |
|                         |                                          | ARHGDI16        |
|                         |                                          | ARHGDI17        |
|                         |                                          | ARHGDI18        |
|                         |                                          | ARHGDI19        |
|                         |                                          | ARHGDI20        |
|                         |                                          | ARHGDI21        |
|                         |                                          | ARHGDI22        |
|                         |                                          | ARHGDI23        |
|                         |                                          | ARHGDI24        |
|                         |                                          | ARHGDI25        |
|                         |                                          | ARHGDI26        |
|                         |                                          | ARHGDI27        |
|                         |                                          | ARHGDI28        |
|                         |                                          | ARHGDI29        |
|                         |                                          | ARHGDI30        |
|                         |                                          | ARHGDI31        |
|                         |                                          | ARHGDI32        |
|                         |                                          | ARHGDI33        |
|                         |                                          | ARHGDI34        |
|                         |                                          | ARHGDI35        |
|                         |                                          | ARHGDI36        |
|                         |                                          | ARHGDI37        |
|                         |                                          | ARHGDI38        |
|                         |                                          | ARHGDI39        |
|                         |                                          | ARHGDI40        |
|                         |                                          | ARHGDI41        |
|                         |                                          | ARHGDI42        |
|                         |                                          | ARHGDI43        |
|                         |                                          | ARHGDI44        |
|                         |                                          | ARHGDI45        |
|                         |                                          | ARHGDI46        |
|                         |                                          | ARHGDI47        |
|                         |                                          | ARHGDI48        |
|                         |                                          | ARHGDI49        |
|                         |                                          | ARHGDI50        |
|                         |                                          | ARHGDI51        |
|                         |                                          | ARHGDI52        |
|                         |                                          | ARHGDI53        |
|                         |                                          | ARHGDI54        |
|                         |                                          | ARHGDI55        |
|                         |                                          | ARHGDI56        |
|                         |                                          | ARHGDI57        |
|                         |                                          | ARHGDI58        |
|                         |                                          | ARHGDI59        |
|                         |                                          | ARHGDI60        |
|                         |                                          | ARHGDI61        |
|                         |                                          | ARHGDI62        |
|                         |                                          | ARHGDI63        |
|                         |                                          | ARHGDI64        |
|                         |                                          | ARHGDI65        |
|                         |                                          | ARHGDI66        |
|                         |                                          | ARHGDI67        |
|                         |                                          | ARHGDI68        |
|                         |                                          | ARHGDI69        |
|                         |                                          | ARHGDI70        |
|                         |                                          | ARHGDI71        |
|                         |                                          | ARHGDI72        |
|                         |                                          | ARHGDI73        |
|                         |                                          | ARHGDI74        |
|                         |                                          | ARHGDI75        |
|                         |                                          | ARHGDI76        |
|                         |                                          | ARHGDI77        |
|                         |                                          | ARHGDI78        |
|                         |                                          | ARHGDI79        |
|                         |                                          | ARHGDI80        |
|                         |                                          | ARHGDI81        |
|                         |                                          | ARHGDI82        |
|                         |                                          | ARHGDI83        |
|                         |                                          | ARHGDI84        |
|                         |                                          | ARHGDI85        |
|                         |                                          | ARHGDI86        |
|                         |                                          | ARHGDI87        |
|                         |                                          | ARHGDI88        |
|                         |                                          | ARHGDI89        |
|                         |                                          | ARHGDI90        |
|                         |                                          | ARHGDI91        |
|                         |                                          | ARHGDI92        |
|                         |                                          | ARHGDI93        |
|                         |                                          | ARHGDI94        |
|                         |                                          | ARHGDI95        |
|                         |                                          | ARHGDI96        |
|                         |                                          | ARHGDI97        |
|                         |                                          | ARHGDI98        |
|                         |                                          | ARHGDI99        |
|                         |                                          | ARHGDI100       |
|                         |                                          | ARHGDI101       |
|                         |                                          | ARHGDI102       |
|                         |                                          | ARHGDI103       |
|                         |                                          | ARHGDI104       |
|                         |                                          | ARHGDI105       |
|                         |                                          | ARHGDI106       |
|                         |                                          | ARHGDI107       |
|                         |                                          | ARHGDI108       |
|                         |                                          | ARHGDI109       |
|                         |                                          | ARHGDI110       |
|                         |                                          | ARHGDI111       |
|                         |                                          | ARHGDI112       |
|                         |                                          | ARHGDI113       |
|                         |                                          | ARHGDI114       |
|                         |                                          | ARHGDI115       |
|                         |                                          | ARHGDI116       |
|                         |                                          | ARHGDI117       |
|                         |                                          | ARHGDI118       |
|                         |                                          | ARHGDI119       |
|                         |                                          | ARHGDI120       |
|                         |                                          | ARHGDI121       |
|                         |                                          | ARHGDI122       |
|                         |                                          | ARHGDI123       |
|                         |                                          | ARHGDI124       |
|                         |                                          | ARHGDI125       |
|                         |                                          | ARHGDI126       |
|                         |                                          | ARHGDI127       |
|                         |                                          | ARHGDI128       |
|                         |                                          | ARHGDI129       |
|                         |                                          | ARHGDI130       |
|                         |                                          | ARHGDI131       |
|                         |                                          | ARHGDI132       |
|                         |                                          | ARHGDI133       |
|                         |                                          | ARHGDI134       |
|                         |                                          | ARHGDI135       |
|                         |                                          | ARHGDI136       |
|                         |                                          | ARHGDI137       |
|                         |                                          | ARHGDI138       |
|                         |                                          | ARHGDI139       |
|                         |                                          | ARHGDI140       |
|                         |                                          | ARHGDI141       |
|                         |                                          | ARHGDI142       |
|                         |                                          | ARHGDI143       |
|                         |                                          | ARHGDI144       |
|                         |                                          | ARHGDI145       |
|                         |                                          | ARHGDI146       |
|                         |                                          | ARHGDI147       |
|                         |                                          | ARHGDI148       |
|                         |                                          | ARHGDI149       |
|                         |                                          | ARHGDI150       |
|                         |                                          | ARHGDI151       |
|                         |                                          | ARHGDI152       |
|                         |                                          | ARHGDI153       |
|                         |                                          | ARHGDI154       |
|                         |                                          | ARHGDI155       |
|                         |                                          | ARHGDI156       |
|                         |                                          | ARHGDI157       |
|                         |                                          | ARHGDI158       |
|                         |                                          | ARHGDI159       |
|                         |                                          | ARHGDI160       |
|                         |                                          | ARHGDI161       |
|                         |                                          | ARHGDI162       |
|                         |                                          | ARHGDI163       |
|                         |                                          | ARHGDI164       |
|                         |                                          | ARHGDI165       |
|                         |                                          | ARHGDI166       |
|                         |                                          | ARHGDI167       |
|                         |                                          | ARHGDI168       |
|                         |                                          | ARHGDI169       |
|                         |                                          | ARHGDI170       |
|                         |                                          | ARHGDI171       |
|                         |                                          | ARHGDI172       |
|                         |                                          | ARHGDI173       |
|                         |                                          | ARHGDI174       |
|                         |                                          | ARHGDI175       |
|                         |                                          | ARHGDI176       |
|                         |                                          | ARHGDI177       |
|                         |                                          | ARHGDI178       |
|                         |                                          | ARHGDI179       |
|                         |                                          | ARHGDI180       |
|                         |                                          | ARHGDI181       |
|                         |                                          | ARHGDI182       |
|                         |                                          | ARHGDI183       |
|                         |                                          | ARHGDI184       |
|                         |                                          | ARHGDI185       |
|                         |                                          | ARHGDI186       |
|                         |                                          | ARHGDI187       |
|                         |                                          | ARHGDI188       |
|                         |                                          | ARHGDI189       |
|                         |                                          | ARHGDI190       |
|                         |                                          | ARHGDI191       |
|                         |                                          | ARHGDI192       |
|                         |                                          | ARHGDI193       |
|                         |                                          | ARHGDI194       |
|                         |                                          | ARHGDI195       |
|                         |                                          | ARHGDI196       |
|                         |                                          | ARHGDI197       |
|                         |                                          | ARHGDI198       |
|                         |                                          | ARHGDI199       |
|                         |                                          | ARHGDI200       |

CDC42EP2  
CDC42EP4  
CDK1  
CDK5RAP2  
CENPE  
CENPF  
CENPJ  
CEP192  
CEP250  
CEP57  
CEP72  
CKAP5  
CLASP1  
CLIP1  
CLIP2  
CNTRL  
CNTROB  
CRIPAK  
CSNK1D  
CTTN  
CYTH2  
DLG1  
DLGAP5  
DOCK2  
DOCK4  
DST  
DYNC1H1  
DYNLL2  
ECT2  
EPB41  
EPB41L2  
ESPL1  
EZR  
FARP1  
FBXO5  
FGD4  
FGD6  
FLNA  
FLNB  
FSCN1  
GEMIN4  
GSN  
HDAC6  
HOOK3  
INCENP  
ITSN1  
KATNA1

KATNB1  
KIF11  
KIF15  
KIF1B  
KIF20B  
KIF22  
KIF23  
KIF2C  
KIF3B  
KIF3C  
KIF4A  
KIF5B  
KIFAP3  
KLC1  
KNTC1  
KPTN  
LATS1  
LLGL1  
LMNB1  
LRPPRC  
MAP1S  
MAP3K11  
MAPRE1  
MARCKS  
MARK4  
MID1  
MID1IP1  
MYH10  
MYH9  
MYO1E  
MYO9B  
NCK1  
NCK2  
NDC80  
NEDD9  
NEK2  
NET1  
NF1  
NIN  
NOTCH2  
NUMA1  
NUSAP1  
OPHN1  
PAFAH1B1  
PALLD  
PCGF5  
PCM1

PCNT  
PDLIM5  
PIF1  
PKD2  
PLEKHG2  
PLK1  
PPP4R2  
PRC1  
PREX1  
PXN  
RAB3GAP1  
RABGAP1  
RACGAP1  
RALBP1  
RANBP9  
RAPGEF5  
RAPGEF6  
RASA1  
RASA2  
RASAL2  
RFC1  
RHOF  
RHOT2  
RICTOR  
ROCK1  
SAC3D1  
SASS6  
  
42987  
  
SHROOM1  
SHROOM2  
SMC1A  
SMC3  
SMC4  
SORBS2  
SOS1  
SPTAN1  
SPTBN1  
SSH2  
STAU1  
STK38L  
SUN2  
SYNPO  
TAOK2  
TBCD  
TIAM1  
TLK1  
TOP2A



TPX2  
TRIO  
TSC1  
TTK  
TUBA4A  
TUBD1  
TUBGCP2  
TUBGCP3  
TUBGCP5  
TUBGCP6  
UXT  
VCL  
WASF1  
WASF2  
WASL  
YWHAE





























































| positive regulation of cellular process | negative regulation of lymphocyte proliferation | cell-substrate adhesion |
|-----------------------------------------|-------------------------------------------------|-------------------------|
| GO:0048522                              | GO:0050672                                      | GO:0031589              |
| AOA2I3RWM4                              | A0A2I2Z753                                      | ABL1                    |
| AOA2I3S8Z1                              | A0A2I3S1F2                                      | ACTN1                   |
| CHLRE_07g353350v5                       | CD80                                            | ACTN2                   |
| EPHB3                                   | F6SF82                                          | ACTN3                   |
| F6T2L3                                  | F6W6J0                                          | ADAM15                  |
| GPR65                                   | LGALS7                                          | ADAM9                   |
| KARS                                    | LGALS9                                          | ADAMTS12                |
| NFATC2IP                                | LOC100066399                                    | ADAMTS13                |
| POU6F2                                  | PDCD1LG2                                        | AKIP1                   |
| PSME4                                   | TNFRSF21                                        | ANGPT1                  |
|                                         |                                                 | ANGPTL3                 |
|                                         |                                                 | ANTXR1                  |
|                                         |                                                 | ARHGAP6                 |
|                                         |                                                 | ARHGEF7                 |
|                                         |                                                 | AXL                     |
|                                         |                                                 | BCAM                    |
|                                         |                                                 | BCL2                    |
|                                         |                                                 | BCL2L11                 |
|                                         |                                                 | BVES                    |
|                                         |                                                 | CCL21                   |
|                                         |                                                 | CD34                    |
|                                         |                                                 | CD44                    |
|                                         |                                                 | CD63                    |
|                                         |                                                 | CD96                    |
|                                         |                                                 | CDK5                    |
|                                         |                                                 | CNTN2                   |
|                                         |                                                 | COL13A1                 |
|                                         |                                                 | COL17A1                 |
|                                         |                                                 | COL3A1                  |
|                                         |                                                 | COL5A3                  |
|                                         |                                                 | CORO1A                  |
|                                         |                                                 | CTGF                    |
|                                         |                                                 | CTNNB1                  |
|                                         |                                                 | CTTN                    |
|                                         |                                                 | CUZD1                   |
|                                         |                                                 | DAG1                    |
|                                         |                                                 | DDR1                    |
|                                         |                                                 | DEFB118                 |
|                                         |                                                 | DLC1                    |
|                                         |                                                 | ECM2                    |
|                                         |                                                 | EDA                     |
|                                         |                                                 | EFNA1                   |
|                                         |                                                 | EMP2                    |

EPB41L5  
EPDR1  
EPHA1  
EPHB1  
EPHB3  
FBLN5  
FER  
FERMT2  
FERMT3  
FGA  
FGB  
FGFRL1  
FGG  
FN1  
FREM1  
FXC1  
FZD4  
FZD7  
GAS6  
HOXD3  
HPSE  
ID1  
ILK  
ITGA1  
ITGA10  
ITGA11  
ITGA2  
ITGA2B  
ITGA3  
ITGA4  
ITGA5  
ITGA6  
ITGA7  
ITGA8  
ITGAL  
ITGAV  
ITGB1  
ITGB1BP1  
ITGB2  
ITGB3  
ITGB4  
ITGB5  
ITGB6  
ITGB7  
ITGB8  
JAM3  
JUB

KIF14  
LAMA5  
LAMB1  
LAMC1  
LYPD3  
LYPD5  
LYVE1  
MADCAM1  
MARCKS  
MERTK  
MICALL2  
MKLN1  
MSLN  
MSLNL  
MUC4  
MYO1G  
NID1  
NID2  
NPNT  
OTOA  
PARVA  
PARVG  
PDPK1  
PEAK1  
PIP5K1A  
PKD1  
PPARD  
PPFIA1  
PPFIA2  
PRKX  
PTK2B  
PTPRK  
PXN  
RAB1A  
RAC1  
RADIL  
RCC2  
RHOD  
SGCE  
SIGLEC1  
SMAD6  
SNED1  
SORBS1  
SORBS3  
SRC  
SRCIN1  
SRF

SRGAP2  
STRC  
STRCP1  
TAOK2  
TECTA  
TEK  
TESK2  
THBS3  
THY1  
TIAM1  
TMEM8B  
TNFRSF12A  
TNN  
TNXB  
TRIP6  
TRPM7  
TSC1  
TTYH1  
TYRO3  
VAMP3  
VCAM1  
VCL  
VTN  
VWA2  
VWF  
WHAMM  
ZYX

































































| cell adhesion | biological adhesion | regulation of vasculature development |
|---------------|---------------------|---------------------------------------|
| GO:0007155    | GO:0022610          | GO:1901342                            |
| ASTN1         | AATF                | ACVRL1                                |
| CDK5R1        | ABL1                | ADM                                   |
| CEL           | ABL2                | ADM2                                  |
| CNTN4         | ACAN                | ADRB2                                 |
| NCAM2         | ACE2                | AGGF1                                 |
| NINJ2         | ACHE                | AGT                                   |
| NLGN1         | ACTB                | ALOX12                                |
| NLGN2         | ACTG1               | AMOT                                  |
| NLGN3         | ACTN1               | ANGPT2                                |
| NLGN4X        | ACTN2               | ANGPT4                                |
| NLGN4Y        | ACTN3               | ANGPTL3                               |
| NRXN1         | ADA                 | ANGPTL4                               |
| NRXN2         | ADAM12              | ANXA3                                 |
| NRXN3         | ADAM15              | APOH                                  |
| RET           | ADAM17              | AQP1                                  |
| TNR           | ADAM2               | ASB4                                  |
|               | ADAM22              | BAI1                                  |
|               | ADAM23              | BAI2                                  |
|               | ADAM8               | BAI3                                  |
|               | ADAM9               | BMP4                                  |
|               | ADAMTS12            | BMP7                                  |
|               | ADAMTS13            | BRCA1                                 |
|               | AGGF1               | BTG1                                  |
|               | AIMP1               | C13orf15                              |
|               | AIRE                | C19orf10                              |
|               | AJAP1               | C3                                    |
|               | AKIP1               | C3AR1                                 |
|               | ALCAM               | C5                                    |
|               | AMBN                | C5AR1                                 |
|               | AMBP                | C6                                    |
|               | AMELX               | CCBE1                                 |
|               | AMICA1              | CCL11                                 |
|               | AMIGO1              | CCL2                                  |
|               | AMIGO2              | CCL24                                 |
|               | AMIGO3              | CCL5                                  |
|               | AMTN                | CCR2                                  |
|               | ANGPT1              | CCR3                                  |
|               | ANGPTL3             | CD34                                  |
|               | ANTXR1              | CELA1                                 |
|               | ANXA1               | CHI3L1                                |
|               | ANXA9               | CHRNA7                                |
|               | AOC3                | CIB1                                  |
|               | APBA1               | CMA1                                  |

|          |         |
|----------|---------|
| APBB1IP  | COL4A2  |
| APC      | COL4A3  |
| APLP1    | CTH     |
| APOA4    | CTNNB1  |
| APP      | CTSH    |
| ARF6     | CX3CL1  |
| ARHGAP5  | CX3CR1  |
| ARHGAP6  | CXCL10  |
| ARHGEF7  | CXCL13  |
| ARVCF    | CXCR3   |
| ASTL     | CYP1B1  |
| ASTN1    | CYSLTR2 |
| ATG5     | DAB2IP  |
| ATP1B1   | DCN     |
| ATP1B2   | DDAH1   |
| ATP2A2   | DLL1    |
| ATP2C1   | DLL4    |
| ATP4B    | ECM1    |
| ATP7A    | ECSCR   |
| AXL      | EFNA1   |
| AZGP1    | EGLN1   |
| AZI2     | EGR1    |
| B2M      | EMP2    |
| B4GALT1  | ENG     |
| BAI1     | ENPP2   |
| BATF     | EPHA1   |
| BAX      | EPHA2   |
| BCAM     | ERAP1   |
| BCAN     | ERBB2   |
| BCAR1    | ETS1    |
| BCL11B   | F3      |
| BCL2     | FASLG   |
| BCL2L11  | FGF1    |
| BCL3     | FGF16   |
| BGLAP    | FGF18   |
| BMP10    | FGF2    |
| BMP7     | FLT1    |
| BMX      | FOXC1   |
| BOC      | FOXC2   |
| BRAF     | FOXO4   |
| BTN3A1   | GATA2   |
| BVES     | GATA4   |
| BYSL     | GATA6   |
| C10orf54 | GDF2    |
| C1orf177 | GHRL    |
| C1orf38  | GPBR    |
| CADM1    | GPR124  |

|         |          |
|---------|----------|
| CADM2   | GPR4     |
| CADM3   | GREM1    |
| CADM4   | GTF2I    |
| CALCA   | HDAC5    |
| CAMSAP3 | HDAC7    |
| CARD11  | HDAC9    |
| CASK    | HEY1     |
| CASP8   | HEY2     |
| CASS4   | HGF      |
| CBLL1   | HHEX     |
| CBLN1   | HIF1A    |
| CCL11   | HIF1AN   |
| CCL19   | HIPK1    |
| CCL2    | HIPK2    |
| CCL21   | HMGB1    |
| CCL4    | HMOX1    |
| CCL5    | HOXA5    |
| CCND3   | HRG      |
| CCR1    | HSPB1    |
| CCR3    | HTATIP2  |
| CCR7    | HYAL1    |
| CCR8    | ID1      |
| CD151   | IL17F    |
| CD164   | IL1A     |
| CD1C    | IL1B     |
| CD1D    | IL6      |
| CD2     | IL8      |
| CD200   | ISL1     |
| CD209   | ITGA5    |
| CD22    | ITGB1BP1 |
| CD226   | ITGB2    |
| CD24    | JAK1     |
| CD276   | KDR      |
| CD28    | KIT      |
| CD2AP   | KLF4     |
| CD300A  | KLK3     |
| CD33    | KRIT1    |
| CD34    | KRT1     |
| CD36    | LECT1    |
| CD3D    | LEP      |
| CD3E    | LIF      |
| CD3G    | LRG1     |
| CD4     | MAP2K5   |
| CD40LG  | MAPK7    |
| CD44    | MMRN2    |
| CD47    | MTDH     |
| CD58    | MYOCD    |

|        |          |
|--------|----------|
| CD6    | NF1      |
| CD63   | NODAL    |
| CD7    | NOS3     |
| CD72   | NOTCH1   |
| CD74   | NPPB     |
| CD80   | NPR1     |
| CD81   | NR2E1    |
| CD84   | NTRK1    |
| CD86   | PDCD10   |
| CD8A   | PDCD6    |
| CD8B   | PDCL3    |
| CD9    | PDE3B    |
| CD93   | PDGFA    |
| CD96   | PDGFB    |
| CD97   | PDGFD    |
| CD99   | PF4      |
| CD99L2 | PGF      |
| CDC42  | PIK3R6   |
| CDH1   | PLCG1    |
| CDH10  | PLXND1   |
| CDH11  | PML      |
| CDH12  | PPP1R15A |
| CDH13  | PPP1R16B |
| CDH15  | PRKCA    |
| CDH16  | PRKCB    |
| CDH17  | PRKD1    |
| CDH18  | PRKD2    |
| CDH19  | PROK1    |
| CDH2   | PROK2    |
| CDH20  | PTGER4   |
| CDH22  | PTGIS    |
| CDH23  | PTGS2    |
| CDH24  | PTK2B    |
| CDH26  | PTN      |
| CDH3   | PTPRM    |
| CDH4   | RAMP2    |
| CDH5   | RAP1A    |
| CDH6   | RAPGEF2  |
| CDH7   | RAPGEF3  |
| CDH8   | RHOA     |
| CDH9   | RHOB     |
| CDHR1  | RLN2     |
| CDHR2  | RNH1     |
| CDHR3  | ROCK1    |
| CDHR4  | ROCK2    |
| CDHR5  | RRAS     |
| CDK5   | RUNX1    |



|         |           |
|---------|-----------|
| CDK5R1  | SASH1     |
| CDK6    | SEMA3E    |
| CDON    | SEMA4A    |
| CDSN    | SEMA5A    |
| CEACAM1 | SERPINB7  |
| CEACAM5 | SERPINE1  |
| CEBPB   | SERPINF1  |
| CEL     | SFRP1     |
| CELSR1  | SFRP2     |
| CELSR2  | SIRT1     |
| CELSR3  | SP100     |
| CEP41   | SPARC     |
| CERCAM  | SPHK1     |
| CFDP1   | SPINK5    |
| CGREF1  | SRPX2     |
| CHD7    | STAB1     |
| CHL1    | STARD13   |
| CHST10  | STAT1     |
| CHST4   | SULF1     |
| CIB1    | SYNJ2BP   |
| CLCA2   | TBXA2R    |
| CLDN1   | TEK       |
| CLDN10  | TGFBR2    |
| CLDN11  | THBS1     |
| CLDN12  | THBS2     |
| CLDN14  | THBS4     |
| CLDN15  | TIE1      |
| CLDN16  | TMEM100   |
| CLDN17  | TMIGD2    |
| CLDN18  | TNFAIP3   |
| CLDN19  | TNFRSF12A |
| CLDN2   | TNFSF12   |
| CLDN20  | TNMD      |
| CLDN22  | TSPAN12   |
| CLDN23  | TWIST1    |
| CLDN3   | UTS2      |
| CLDN4   | UTS2R     |
| CLDN5   | VASH1     |
| CLDN6   | VASH2     |
| CLDN7   | VEGFA     |
| CLDN8   | VEGFB     |
| CLDN9   | VEGFC     |
| CLEC4A  | WARS      |
| CLEC4D  | WNT4      |
| CLEC4E  | WNT5A     |
| CLEC4M  | WT1       |
| CLEC7A  | XDH       |

|          |         |
|----------|---------|
| CLIC1    | ZC3H12A |
| CLSTN1   | ZNF304  |
| CLSTN2   |         |
| CLSTN3   |         |
| CNO      |         |
| CNTN1    |         |
| CNTN2    |         |
| CNTN3    |         |
| CNTN4    |         |
| CNTN5    |         |
| CNTN6    |         |
| CNTNAP1  |         |
| CNTNAP2  |         |
| CNTNAP3  |         |
| CNTNAP3B |         |
| CNTNAP4  |         |
| CNTNAP5  |         |
| COL12A1  |         |
| COL13A1  |         |
| COL14A1  |         |
| COL15A1  |         |
| COL16A1  |         |
| COL17A1  |         |
| COL18A1  |         |
| COL19A1  |         |
| COL28A1  |         |
| COL3A1   |         |
| COL4A3   |         |
| COL4A6   |         |
| COL5A1   |         |
| COL5A3   |         |
| COL6A1   |         |
| COL6A2   |         |
| COL6A3   |         |
| COL6A5   |         |
| COL6A6   |         |
| COL7A1   |         |
| COL8A1   |         |
| COL8A2   |         |
| COMP     |         |
| CORO1A   |         |
| CREBBP   |         |
| CRISP2   |         |
| CRNN     |         |
| CRTAM    |         |
| CSF3R    |         |
| CSRP1    |         |

CSTA  
CTGF  
CTNNA1  
CTNNA2  
CTNNA3  
CTNNAL1  
CTNNB1  
CTNND1  
CTNND2  
CTPS  
CTTN  
CUZD1  
CX3CL1  
CX3CR1  
CXADR  
CXCL12  
CXCR3  
CXCR7  
CYFIP2  
CYP1B1  
CYP26B1  
CYR61  
DAB1  
DAG1  
DCHS1  
DCHS2  
DDOST  
DDR1  
DDR2  
DEFB118  
DGCR2  
DGCR6  
DLC1  
DLG1  
DLG5  
DLL4  
DNAJA3  
DNAJB6  
DOCK2  
DOCK8  
DPP4  
DPT  
DSC1  
DSC2  
DSC3  
DSCAM  
DSCAML1

DSG1  
DSG2  
DSG3  
DSG4  
DSP  
DST  
EBI3  
ECM2  
EDA  
EDIL3  
EFNA1  
EFNB1  
EFNB2  
EFS  
EGFL6  
EGFL7  
EGFR  
EGR1  
EIF2AK4  
ELF4  
ELMO2  
EMILIN1  
EMILIN2  
EMP2  
EMR1  
EMR2  
ENG  
ENTPD1  
EOMES  
EPB41L5  
EPCAM  
EPDR1  
EPHA1  
EPHA2  
EPHA3  
EPHA4  
EPHA8  
EPHB1  
EPHB3  
EPHB4  
ERBB2IP  
ESAM  
EZR  
F11R  
F2RL1  
FADD  
FAP

FARP2  
FAS  
FAT1  
FAT2  
FAT3  
FAT4  
FBLIM1  
FBLN5  
FBLN7  
FCER1G  
FER  
FERMT1  
FERMT2  
FERMT3  
FEZ1  
FGA  
FGB  
FGFRL1  
FGG  
FIBP  
FKBP1A  
FKBP1B  
FLNA  
FLOT2  
FLRT1  
FLRT2  
FLRT3  
FN1  
FNDC3A  
FOLR4  
FOXF1  
FOXN1  
FOXP1  
FOXP3  
FPR2  
FREM1  
FREM2  
FREM3  
FUT7  
FXC1  
FYN  
FZD4  
FZD5  
FZD7  
FZD8  
GAS6  
GATA1

GATA3  
GCNT1  
GLDN  
GLI3  
GNAS  
GNE  
GOLPH3  
GP1BA  
GP1BB  
GP5  
GP9  
GPA33  
GPNMB  
GPR56  
GPR98  
GRHL2  
GRID2  
HABP2  
HAPLN1  
HAPLN2  
HAPLN3  
HAPLN4  
HAS1  
HAS3  
HBB  
HCK  
HEPACAM  
HES1  
HES5  
HLA-E  
HMGB1  
HOXD3  
HPSE  
HSH2D  
HSP90AB1  
HSPB1  
HSPD1  
IBSP  
ICAM1  
ICAM2  
ICAM3  
ICAM4  
ICAM5  
ICOS  
ICOSLG  
ID1  
IFNA1

IFNA10  
IFNA13  
IFNA14  
IFNA16  
IFNA17  
IFNA2  
IFNA21  
IFNA4  
IFNA5  
IFNA6  
IFNA7  
IFNA8  
IFNAR1  
IFNB1  
IFNE  
IFNG  
IFNK  
IFNW1  
IGFALS  
IGFBP7  
IGSF11  
IGSF5  
IGSF9  
IGSF9B  
IL12B  
IL15  
IL18R1  
IL1B  
IL1RAPL1  
IL2  
IL23A  
IL32  
IL4  
IL6  
IL7  
IL7R  
ILK  
INPPL1  
INS  
IRF1  
IRF4  
ISLR  
ITGA1  
ITGA10  
ITGA11  
ITGA2  
ITGA2B

ITGA3  
ITGA4  
ITGA5  
ITGA6  
ITGA7  
ITGA8  
ITGA9  
ITGAD  
ITGAE  
ITGAL  
ITGAM  
ITGAV  
ITGAX  
ITGB1  
ITGB1BP1  
ITGB2  
ITGB3  
ITGB3BP  
ITGB4  
ITGB5  
ITGB6  
ITGB7  
ITGB8  
ITGBL1  
ITK  
ITPKB  
IZUMO1  
JAG2  
JAM2  
JAM3  
JMJD6  
JUB  
JUP  
KAL1  
KIAA1462  
KIF13B  
KIF14  
KIFC3  
KIRREL  
KIRREL2  
KIRREL3  
KIT  
KITLG  
L1CAM  
LAMA1  
LAMA2  
LAMA3



LAMA4  
LAMA5  
LAMB1  
LAMB2  
LAMB3  
LAMB4  
LAMC1  
LAMC2  
LAMC3  
LAT  
LCK  
LCP1  
LEF1  
LEP  
LEPR  
LFNG  
LGALS3BP  
LGALS4  
LGALS7B  
LIG4  
LILRB1  
LILRB2  
LIMS2  
LMLN  
LOXL2  
LPHN1  
LPHN3  
LPP  
LPXN  
LRFN3  
LRP6  
LRRC15  
LRRN2  
LSAMP  
LY6D  
LY9  
LYPD3  
LYPD5  
LYVE1  
MADCAM1  
MAEA  
MAFB  
MAG  
MAGI1  
MALT1  
MARCKS  
MCAM

MEGF10  
MEGF11  
MERTK  
METAP1  
MFAP4  
MFG8  
MICA  
MICALL2  
MICB  
MKLN1  
MLLT4  
MMP24  
MMRN1  
MOG  
MPDZ  
MPZL2  
MPZL3  
MSLN  
MSLNL  
MSN  
MTSS1  
MUC16  
MUC4  
MYBPC1  
MYBPC2  
MYBPC3  
MYBPH  
MYH10  
MYH9  
MYL12A  
MYL9  
MYO1G  
NCAM1  
NCAM2  
NCAN  
NCK1  
NCK2  
NCR3  
NCSTN  
NEDD4  
NEDD9  
NEGR1  
NEO1  
NFASC  
NHEJ1  
NID1  
NID2

NINJ1  
NINJ2  
NKAP  
NKX2-3  
NLGN1  
NLGN2  
NLGN3  
NLGN4X  
NLGN4Y  
NLRC3  
NME2  
NOV  
NPHP1  
NPHP4  
NPHS1  
NPNT  
NPTN  
NRCAM  
NRP2  
NRXN1  
NRXN2  
NRXN3  
NT5E  
NTM  
NTN1  
NUAK1  
ODZ2  
ODZ3  
OLFM4  
OLR1  
OMD  
OMG  
OPCML  
OTOA  
P2RX7  
P2RY12  
PARVA  
PARVB  
PARVG  
PATZ1  
PAX1  
PCDH1  
PCDH10  
PCDH11X  
PCDH11Y  
PCDH12  
PCDH15

PCDH17  
PCDH18  
PCDH19  
PCDH20  
PCDH7  
PCDH8  
PCDH9  
PCDHA1  
PCDHA10  
PCDHA11  
PCDHA12  
PCDHA13  
PCDHA2  
PCDHA3  
PCDHA4  
PCDHA5  
PCDHA6  
PCDHA7  
PCDHA8  
PCDHA9  
PCDHAC1  
PCDHAC2  
PCDHB1  
PCDHB10  
PCDHB11  
PCDHB12  
PCDHB13  
PCDHB14  
PCDHB15  
PCDHB16  
PCDHB18  
PCDHB2  
PCDHB3  
PCDHB4  
PCDHB5  
PCDHB6  
PCDHB7  
PCDHB8  
PCDHB9  
PCDHGA1  
PCDHGA10  
PCDHGA11  
PCDHGA12  
PCDHGA2  
PCDHGA3  
PCDHGA4  
PCDHGA5

PCDHGA6  
PCDHGA7  
PCDHGA8  
PCDHGA9  
PCDHGB1  
PCDHGB2  
PCDHGB3  
PCDHGB4  
PCDHGB5  
PCDHGB6  
PCDHGB7  
PCDHGC3  
PCDHGC4  
PCDHGC5  
PDGFRA  
PDPK1  
PDPN  
PDZD2  
PEAK1  
PECAM1  
PERP  
PGM5  
PIK3CB  
PIK3CD  
PIK3CG  
PIP5K1A  
PIP5K1C  
PKD1  
PKD1L1  
PKHD1  
PKN2  
PKNOX1  
PKP1  
PKP2  
PKP3  
PKP4  
PLA2G2D  
PLEK  
PLEKHA7  
PLXNC1  
PNN  
PODXL  
PODXL2  
POSTN  
PPAP2B  
PPARD  
PPFIA1

PPFIA2  
PPFIBP1  
PPP3CA  
PPP3CB  
PREX1  
PRKCA  
PRKCE  
PRKD2  
PRKDC  
PRKX  
PRLR  
PRPH2  
PSEN1  
PSMB10  
PSTPIP1  
PTGER4  
PTK2B  
PTK7  
PTPN2  
PTPN22  
PTPN6  
PTPRC  
PTPRD  
PTPRF  
PTPRK  
PTPRM  
PTPRS  
PTPRT  
PTPRU  
PVR  
PVRL1  
PVRL2  
PVRL3  
PVRL4  
PXN  
RAB1A  
RAB27A  
RAC1  
RAC2  
RADIL  
RAG1  
RAG2  
RAP2B  
RAPGEF1  
RC3H1  
RC3H2  
RCC2

REG3A  
RELB  
RELN  
RET  
RGMB  
RHOB  
RHOD  
RHOH  
RIC8A  
RIPK2  
RIPK3  
RNASE10  
RND3  
ROBO1  
ROBO2  
ROCK1  
ROM1  
ROPN1B  
RORA  
RORC  
RPL22  
RPS6  
RPSA  
RS1  
RSAD2  
RUNX2  
S100A8  
S100A9  
S1PR1  
SATB1  
SCARB1  
SCARF1  
SCARF2  
SCN1B  
SCRIB  
SDC3  
SDK1  
SDK2  
SELE  
SELL  
SELP  
SELPLG  
SEMA4A  
SEMA4D  
SEMA5A  
SGCE  
SHC1

SHH  
SIGLEC1  
SIGLEC10  
SIGLEC11  
SIGLEC12  
SIGLEC14  
SIGLEC16  
SIGLEC5  
SIGLEC6  
SIGLEC7  
SIGLEC8  
SIGLEC9  
SIRPA  
SIRPG  
SLA2  
SLAMF1  
SLAMF6  
SLAMF7  
SLC11A1  
SLC7A11  
SLURP1  
SMAD3  
SMAD6  
SMAGP  
SNED1  
SORBS1  
SORBS2  
SORBS3  
SOX4  
SOX9  
SP3  
SPACA4  
SPAM1  
SPECC1L  
SPG7  
SPN  
SPOCK1  
SPON1  
SPON2  
SPP1  
SRC  
SRCIN1  
SRF  
SRGAP2  
SRPX  
SRPX2  
SSPN



SSPO  
SSX2IP  
STAB1  
STAB2  
STAT5B  
STAT6  
STK10  
STK11  
STOML2  
STRC  
STRCP1  
STXBP1  
STXBP3  
SUSD5  
SVEP1  
SYK  
SYMPK  
TACSTD2  
TAOK2  
TBX21  
TCF7  
TECTA  
TEK  
TESK2  
TGFB1  
TGFB111  
TGFB1  
THBS1  
THBS2  
THBS3  
THBS4  
THEMIS  
THY1  
TIAM1  
TIGIT  
TINAG  
TINAGL1  
TLN1  
TLN2  
TMEM47  
TMEM8A  
TMEM8B  
TNC  
TNF  
TNFAIP6  
TNFRSF12A  
TNFRSF4

TNFSF14  
TNFSF18  
TNFSF4  
TNFSF8  
TNIP1  
TNN  
TNR  
TNXB  
TOR1A  
TPBG  
TREML2  
TRIP6  
TRO  
TROAP  
TRPM7  
TSC1  
TSPAN32  
TSTA3  
TTYH1  
TYRO3  
UMOD  
UNC5D  
VAMP3  
VAV1  
VCAM1  
VCAN  
VCL  
VEZT  
VMP1  
VNN1  
VTN  
VWA2  
VWF  
WAS  
WHAMM  
WISP1  
WISP2  
WISP3  
WNT1  
WNT3A  
WNT4  
WNT7B  
ZAN  
ZAP70  
ZBTB1  
ZFP36L1  
ZFP36L2

ZFPM1  
ZYX





















| angiogenesis | epithelial cell differentiation | epithelium development |
|--------------|---------------------------------|------------------------|
| GO:0001525   | GO:0030855                      | GO:0060429             |
| AAMP         | ABCA12                          | AARS                   |
| ACVR1        | ACAT1                           | ABCA12                 |
| ACVRL1       | ACVR1                           | ABI1                   |
| ADAM15       | ACVR2B                          | ACADVL                 |
| ADAM8        | ACVRL1                          | ACAT1                  |
| ADIPOR2      | ADA                             | ACER1                  |
| ADM2         | ADAMTS16                        | ACTA2                  |
| AGGF1        | ADAMTS2                         | ACTL8                  |
| AIMP1        | ADAMTSL2                        | ACVR1                  |
| ANG          | ADM                             | ACVR1B                 |
| ANGPT1       | AGER                            | ACVR2B                 |
| ANGPT2       | AGR2                            | ACVRL1                 |
| ANGPT4       | AHI1                            | ADAM17                 |
| ANGPTL3      | AIMP2                           | ADAM9                  |
| ANGPTL4      | AKR1B1                          | ADAMTS16               |
| ANGPTL6      | ALDH1A2                         | ADAMTSL2               |
| ANPEP        | ALX1                            | ADM                    |
| ANXA2        | ALX4                            | AGPAT2                 |
| APOD         | AMBRA1                          | AGPAT6                 |
| APOLD1       | APAF1                           | AGR2                   |
| ARHGAP22     | AQP2                            | AHI1                   |
| ARHGAP24     | AREG                            | AIMP2                  |
| ATP5B        | ARG1                            | AKR1C1                 |
| ATPIF1       | ARG2                            | AKR1C2                 |
| B4GALT1      | ARHGAP35                        | AKR1C3                 |
| BAK1         | ARID1A                          | AKT1                   |
| BAX          | ARL13B                          | AKT2                   |
| BCAS3        | ASCL1                           | ALDH1A2                |
| BMP4         | ASS1                            | ALDH1A3                |
| BMPER        | ASXL1                           | ALDH3A2                |
| C19orf10     | ATOH8                           | ALDOC                  |
| C1GALT1      | ATP6AP2                         | ALX1                   |
| CALCRL       | ATP7A                           | ALX4                   |
| CAV1         | ATRX                            | AMBRA1                 |
| CCBE1        | ATXN1L                          | ANXA1                  |
| CCL2         | B4GALT1                         | ANXA4                  |
| CD34         | BAG6                            | ANXA7                  |
| CDC42        | BAK1                            | APAF1                  |
| CDH13        | BAX                             | APCDD1                 |
| CEACAM1      | BBS4                            | AREG                   |
| CIB1         | BBS5                            | ARG2                   |
| CLIC4        | BBS7                            | ARHGAP12               |
| COL15A1      | BCAS3                           | ARHGAP35               |

|         |          |          |
|---------|----------|----------|
| COL18A1 | BCL10    | ARHGEF26 |
| COL4A1  | BCL2     | ARID1A   |
| COL4A2  | BCL2L11  | ARID4A   |
| COL8A1  | BMP2     | ARID4B   |
| COL8A2  | BMP4     | ARL13B   |
| CSPG4   | BMP7     | ARX      |
| CTGF    | BMPER    | ASCL1    |
| CTNNA1  | BMPR1A   | ATM      |
| CX3CL1  | BMPR2    | ATOH1    |
| CXCL17  | BTRC     | ATP2A2   |
| CXCR3   | C12orf5  | ATP2B2   |
| CXCR7   | C1GALT1  | ATP2C1   |
| CYP1B1  | C2CD3    | ATP6AP2  |
| CYR61   | C3orf54  | ATP7A    |
| DAB2IP  | C6orf170 | ATRX     |
| DLL1    | C8orf85  | AXIN1    |
| DLL4    | CALB1    | AXIN2    |
| E2F7    | CAT      | B4GALT1  |
| E2F8    | CC2D2A   | B9D1     |
| ECM1    | CCDC103  | BAK1     |
| ECSCR   | CCDC39   | BARX1    |
| EDN1    | CCDC40   | BASP1    |
| EDNRA   | CCKBR    | BAX      |
| EFNA1   | CCL11    | BBS4     |
| EFNB2   | CCM2     | BBS5     |
| EGF     | CCNB1    | BBS7     |
| EGFL7   | CDKN1A   | BCCIP    |
| EGR3    | CDX2     | BCL10    |
| EIF2AK3 | CEBPA    | BCL11B   |
| ELK3    | CECR2    | BCL2     |
| ENG     | CELSR1   | BDH2     |
| ENPEP   | CER1     | BFSP1    |
| EPAS1   | CHD7     | BFSP2    |
| EPGN    | CHD8     | BMP15    |
| EPHA1   | CHI3L1   | BMP2     |
| EPHA2   | CHRD     | BMP4     |
| EPHB1   | CIC      | BMP5     |
| EPHB2   | CITED1   | BMP6     |
| EPHB3   | CITED2   | BMP7     |
| EPHB4   | CLDN18   | BMPER    |
| ERAP1   | CLIC4    | BMPR1A   |
| EREG    | CLMP     | BMPR2    |
| ESM1    | COBL     | BNC1     |
| ETS1    | COL3A1   | BTRC     |
| FAM105B | COL4A1   | C10orf11 |
| FAP     | CP       | C11orf34 |
| FGF1    | CPS1     | C12orf5  |

|         |          |          |
|---------|----------|----------|
| FGF10   | CREB1    | C19orf46 |
| FGF18   | CRH      | C1GALT1  |
| FGF2    | CRISPLD2 | C1orf172 |
| FGF6    | CRLF1    | C1orf68  |
| FGF8    | CSF1     | C2CD3    |
| FGF9    | CSF1R    | C3orf54  |
| FGFR1   | CSNK2B   | C5orf42  |
| FGFR2   | CTGF     | C6orf108 |
| FIGF    | CTHRC1   | C6orf170 |
| FLT1    | CTNNB1   | CA2      |
| FLT4    | CTNNBIP1 | CA9      |
| FMNL3   | CTSH     | CALB1    |
| FN1     | CTSZ     | CALML5   |
| FOXC2   | CYP1A1   | CAPN5    |
| FZD5    | CYP1A2   | CASP14   |
| FZD8    | DAB1     | CASP3    |
| GBX2    | DAB2IP   | CASP6    |
| GDF2    | DACT1    | CAT      |
| GJA5    | DACT2    | CBFA2T2  |
| GNA13   | DAG1     | CBR1     |
| GPI     | DCHS1    | CC2D2A   |
| GPLD1   | DDR1     | CCDC103  |
| GPR124  | DEAF1    | CCDC39   |
| GPR4    | DHCR7    | CCDC40   |
| GPR56   | DLC1     | CCDC67   |
| GPX1    | DLG1     | CCL11    |
| GREM1   | DLG5     | CCM2     |
| HAND1   | DLL1     | CCND1    |
| HAND2   | DLL4     | CCNO     |
| HEY1    | DNAAF1   | CD109    |
| HIF1A   | DPPA2    | CD24     |
| HIF3A   | DPPA4    | CD34     |
| HMOX1   | DVL1     | CD63     |
| HOXA3   | DVL2     | CDC42    |
| HOXA7   | DVL3     | CDH2     |
| HOXB13  | EDA      | CDH3     |
| HOXB3   | EDAR     | CDHR2    |
| HPSE    | EDN1     | CDK1     |
| HRG     | EDN2     | CDK6     |
| HS6ST1  | EDNRA    | CDKN1A   |
| HSPG2   | EDNRB    | CDSN     |
| HTATIP2 | EFNB2    | CDX2     |
| ID1     | EGF      | CEACAM1  |
| IL18    | EGFR     | CEBPB    |
| IL8     | EIF4E    | CECR2    |
| ITGA5   | EIF4EBP1 | CELSR1   |
| ITGAV   | EN1      | CEP290   |

|          |         |          |
|----------|---------|----------|
| ITGB1    | ENG     | CER1     |
| ITGB1BP1 | EP300   | CERS3    |
| ITGB3    | EPAS1   | CES1     |
| JAG1     | EPB41L5 | CHD7     |
| JAM3     | EPCAM   | CHRD     |
| JMJD6    | EPHA2   | CITED1   |
| JUN      | EPHA4   | CITED2   |
| KDR      | EPHA7   | CLDN3    |
| KLF5     | EPHB3   | CLIC4    |
| KRIT1    | ERRFI1  | CLIC5    |
| LAMA5    | ESR1    | CNFN     |
| LEF1     | ETV4    | CNN3     |
| LEP      | EYA1    | COBL     |
| LEPR     | FAT4    | COL17A1  |
| LOXL2    | FERD3L  | COL18A1  |
| LRP5     | FGF1    | COL2A1   |
| MAPK14   | FGF10   | COL4A1   |
| MCAM     | FGF18   | COL5A1   |
| MED1     | FGF2    | COL7A1   |
| MEIS1    | FGF7    | CPS1     |
| MEOX2    | FGF8    | CPT1A    |
| MFGE8    | FGF9    | CRABP2   |
| MMP14    | FGFR1   | CRB2     |
| MMP19    | FGFR2   | CRCT1    |
| MMP2     | FKBP8   | CREB1    |
| MMRN2    | FMN1    | CRHR2    |
| MYH9     | FOLR1   | CRLF1    |
| NAA15    | FOXA1   | CRYGB    |
| NCL      | FOXB1   | CRYGD    |
| NDNF     | FOXC1   | CRYGS    |
| NFATC4   | FOXC2   | CSF1     |
| NOS3     | FOXD1   | CSF1R    |
| NOTCH1   | FOXE1   | CSNK2B   |
| NOTCH3   | FOXF1   | CST6     |
| NOTCH4   | FOXF2   | CSTA     |
| NOV      | FOXH1   | CTGF     |
| NOX1     | FOXJ1   | CTHRC1   |
| NOX5     | FOXL1   | CTNNB1   |
| NR4A1    | FOXN4   | CTNNBIP1 |
| NRARP    | FOXP2   | CTSB     |
| NRCAM    | FSTL3   | CTSH     |
| NRP1     | FUZ     | CTSL2    |
| NRP2     | FZD1    | CTSZ     |
| NRXN1    | FZD2    | CXCR4    |
| NRXN3    | FZD3    | CYP1A1   |
| NUS1     | FZD6    | CYP26B1  |
| OVOL2    | GATA1   | CYP7B1   |



|         |        |          |
|---------|--------|----------|
| PARVA   | GATA2  | CYR61    |
| PDCD10  | GATA3  | DAB2     |
| PDCD6   | GATA4  | DACT1    |
| PDCL3   | GATA5  | DACT2    |
| PDE3B   | GATA6  | DAG1     |
| PDGFA   | GBX2   | DCHS1    |
| PDGFRA  | GDF11  | DCT      |
| PDGFRB  | GDF2   | DDR1     |
| PGF     | GDF7   | DEAF1    |
| PIK3CA  | GDNF   | DHRS9    |
| PIK3CB  | GJA1   | DKK1     |
| PIK3CG  | GJA5   | DLC1     |
| PIK3R6  | GLI1   | DLG1     |
| PITX2   | GLI2   | DLG3     |
| PKNOX1  | GLI3   | DLG5     |
| PLAU    | GLMN   | DLL1     |
| PLCD1   | GNA13  | DLL3     |
| PLCD3   | GPC3   | DLL4     |
| PLXDC1  | GPSM2  | DLX3     |
| PLXND1  | GREM1  | DLX5     |
| PNPLA6  | GRHL2  | DLX6     |
| POFUT1  | GRHL3  | DMBT1    |
| PRCP    | GSC    | DMRT1    |
| PRKCA   | GZF1   | DNAAF1   |
| PRKD1   | HAND1  | DNASE1L2 |
| PRKD2   | HAND2  | DSG4     |
| PRKX    | HECA   | DSP      |
| PROK1   | HEG1   | DVL1     |
| PROK2   | HES1   | DVL2     |
| PTEN    | HES3   | DVL3     |
| PTGS2   | HES5   | E2F4     |
| PTK2    | HEYL   | E2F7     |
| PTK2B   | HHEX   | E2F8     |
| PTPRB   | HHIP   | EDA      |
| RAMP1   | HIF1A  | EDA2R    |
| RAMP2   | HLX    | EDAR     |
| RAPGEF3 | HMGB1  | EDF1     |
| RASIP1  | HMGCS2 | EDN1     |
| RBM15   | HNF1B  | EDN3     |
| RBPJ    | HNRNPK | EDNRA    |
| RHOB    | HOPX   | EDNRB    |
| RNF213  | HOXA1  | EFNB2    |
| ROBO1   | HOXA11 | EGF      |
| ROBO4   | HOXA5  | EGFR     |
| RORA    | HOXD11 | EHF      |
| RSPO3   | HOXD13 | ELF3     |
| S100A7  | HRH2   | ELF5     |

|           |          |         |
|-----------|----------|---------|
| S1PR1     | HRSP12   | EMP1    |
| SAT1      | HS6ST1   | EMX1    |
| SCG2      | HSD11B1  | EN1     |
| SEMA3E    | HSPB11   | ENG     |
| SEMA4A    | ID1      | EP300   |
| SEMA5A    | ID2      | EPB41L5 |
| SERPINE1  | IFT122   | EPCAM   |
| SETD2     | IFT140   | EPHA2   |
| SFRP2     | IFT172   | EPHA4   |
| SH2D2A    | IFT52    | EPHA7   |
| SHB       | IFT57    | ERBB4   |
| SHC1      | IGFBP5   | ERCC2   |
| SHH       | IHH      | ERCC3   |
| SIRT1     | IL8      | EREG    |
| SLC12A6   | ILK      | ERRFI1  |
| SLIT2     | ING2     | ESR1    |
| SOX17     | INTU     | ESR2    |
| SOX18     | IPMK     | ETV4    |
| SPI1      | IRX1     | EVPL    |
| SRF       | IRX2     | EVPLL   |
| SRPK2     | IRX3     | EXPH5   |
| SRPX2     | ITGA3    | EYA1    |
| STAB2     | ITGA6    | EZR     |
| STK4      | ITGB1BP1 | F11R    |
| SYK       | ITGB3    | F2RL1   |
| TAL1      | ITGB4    | FA2H    |
| TBX1      | ITPK1    | FABP5   |
| TBX20     | JAG1     | FAM20C  |
| TBX4      | JMJD6    | FAT4    |
| TCF21     | KAT2A    | FEM1B   |
| TDGF1     | KDM2B    | FERD3L  |
| TEK       | KDM5B    | FGF1    |
| TGFB2     | KDM6A    | FGF10   |
| TGFBI     | KIF18A   | FGF2    |
| TGFBR1    | KIF20B   | FGF7    |
| TGFBR2    | KIF26B   | FGF8    |
| THBS1     | KIT      | FGFR1   |
| THSD7A    | KLF2     | FGFR2   |
| THY1      | KLF5     | FKBP8   |
| TIE1      | KLHL3    | FLG     |
| TMEM100   | KRAS     | FLNA    |
| TMPRSS6   | LAMA5    | FLNB    |
| TNFAIP2   | LBX1     | FLOT2   |
| TNFRSF12A | LEF1     | FLRT3   |
| TNFSF12   | LGR4     | FMN1    |
| TSPAN12   | LGR5     | FN3K    |
| TYMP      | LHX1     | FNDC3A  |

|         |          |       |
|---------|----------|-------|
| UBP1    | LHX2     | FOLR1 |
| UNC5B   | LHX3     | FOSL2 |
| VASH1   | LIAS     | FOXA1 |
| VAV2    | LIF      | FOXB1 |
| VAV3    | LIPA     | FOXC1 |
| VEGFA   | LMO4     | FOXC2 |
| VEGFB   | LOX      | FOXD1 |
| VEGFC   | LRP5     | FOXE1 |
| VEZF1   | LRP6     | FOXF1 |
| WARS    | LTA4H    | FOXF2 |
| WASF2   | LUZP1    | FOXH1 |
| WNT7A   | MAN1A2   | FOXJ1 |
| XBP1    | MAN2A1   | FOXL2 |
| ZC3H12A | MAP2K1   | FOXN1 |
| ZNF304  | MAP2K2   | FOXN4 |
|         | MAPK1    | FOXQ1 |
|         | MAPK3    | FRAS1 |
|         | MAPK8IP3 | FREM2 |
|         | MED1     | FRMD6 |
|         | MED12    | FRS2  |
|         | MEF2C    | FRZB  |
|         | MEGF8    | FUZ   |
|         | MESP1    | FZD1  |
|         | MET      | FZD2  |
|         | MIB1     | FZD3  |
|         | MICAL2   | FZD5  |
|         | MIXL1    | FZD6  |
|         | MKKS     | FZD7  |
|         | MKS1     | FZR1  |
|         | MMP14    | GAB1  |
|         | MSX2     | GATA3 |
|         | MTHFD1   | GATA4 |
|         | MTHFD1L  | GATA5 |
|         | MTSS1    | GATA6 |
|         | MYC      | GBX2  |
|         | MYCN     | GCM1  |
|         | MYOCD    | GDF11 |
|         | NDRG4    | GDF2  |
|         | NF1      | GDF3  |
|         | NFATC4   | GDF7  |
|         | NFIB     | GDNF  |
|         | NIPBL    | GJA1  |
|         | NKX2-1   | GJA4  |
|         | NKX2-2   | GJA5  |
|         | NKX2-3   | GJB5  |
|         | NKX2-5   | GLI1  |
|         | NKX2-6   | GLI2  |

|         |        |
|---------|--------|
| NKX2-8  | GLI3   |
| NKX3-1  | GLMN   |
| NKX3-2  | GNA13  |
| NODAL   | GNAS   |
| NOG     | GPC3   |
| NOS3    | GPR4   |
| NOTCH1  | GPSM2  |
| NOTCH4  | GPX1   |
| NOTO    | GRB2   |
| NPHP3   | GREM1  |
| NPNT    | GRHL1  |
| NR1H4   | GRHL2  |
| NR4A3   | GRHL3  |
| NRARP   | GRSF1  |
| NRP1    | GRXCR1 |
| NTN1    | GSC    |
| NTS     | GSTA1  |
| NUMA1   | GSTA2  |
| NUMB    | GSTK1  |
| NUP133  | GSTM3  |
| OSR1    | GZF1   |
| OTC     | HAND1  |
| OVOL2   | HAND2  |
| OXTR    | HAPLN2 |
| PAK1    | HBEGF  |
| PAX2    | HDAC1  |
| PAX6    | HDAC2  |
| PAX7    | HEG1   |
| PAX8    | HES1   |
| PBX1    | HES3   |
| PCSK5   | HES5   |
| PDGFA   | HES7   |
| PDGFC   | HESX1  |
| PDGFRA  | HEY1   |
| PDPN    | HEY2   |
| PDX1    | HEYL   |
| PFN1    | HHEX   |
| PGF     | HHIP   |
| PHACTR4 | HIF1A  |
| PHB2    | HNF1B  |
| PHF14   | HNRNP3 |
| PHGDH   | HOXA11 |
| PITX2   | HOXA5  |
| PKD1    | HOXB13 |
| PKD2    | HOXB2  |
| PKDCC   | HOXB4  |
| PLOD3   | HOXB5  |

|          |         |
|----------|---------|
| PLXNA2   | HOXC13  |
| PLXNB2   | HOXD11  |
| PLXND1   | HOXD13  |
| PML      | HPS4    |
| PODXL    | HPS6    |
| POU3F3   | HRH2    |
| PPP1CA   | HRNR    |
| PRDM1    | HSD17B4 |
| PRICKLE1 | HYDIN   |
| PRKACA   | ICAM1   |
| PRKACB   | ID1     |
| PRKD2    | ID2     |
| PRKX     | ID3     |
| PROX1    | ID4     |
| PSEN1    | IDAS    |
| PTCH1    | IFT122  |
| PTK6     | IFT140  |
| PTK7     | IFT172  |
| PTN      | IFT52   |
| RAB3A    | IFT57   |
| RAD21L1  | IFT74   |
| RALA     | IGFBP5  |
| RARA     | IHH     |
| RARB     | IL10    |
| RARG     | IL31RA  |
| RARRES2  | IL6     |
| RASIP1   | ILK     |
| RB1      | INHBA   |
| RBM15    | INSM1   |
| RBP4     | INSR    |
| RBPJ     | INTU    |
| RC3H2    | IPMK    |
| RDH10    | IQGAP1  |
| REC8     | IRF6    |
| RET      | IRX1    |
| RHOA     | IRX2    |
| RHOB     | IRX3    |
| ROBO2    | ITGA2   |
| RPGRIP1L | ITGA5   |
| RPS7     | ITPK1   |
| RSPO2    | IVL     |
| RXRA     | JAG1    |
| RYR2     | JAG2    |
| SALL1    | JAK2    |
| SALL2    | JUB     |
| SALL4    | JUN     |
| SAV1     | KAT2A   |

|          |          |
|----------|----------|
| SCRIB    | KAZN     |
| SCT      | KDM2B    |
| SDC1     | KDM5B    |
| SDC4     | KDM6A    |
| SDCCAG8  | KDM6B    |
| SEC24B   | KDR      |
| SEMA3C   | KIF20B   |
| SEMA3E   | KIF26B   |
| SEMA4C   | KIT      |
| SEPN1    | KLF15    |
| SERPINE2 | KLF2     |
| SETD2    | KLF4     |
| SETDB2   | KLF5     |
| SFRP1    | KLHL3    |
| SFRP2    | KLK14    |
| SFTPD    | KLK5     |
| SHH      | KLK7     |
| SHOX2    | KRAS     |
| SHROOM3  | KRT10    |
| SIM1     | KRT14    |
| SIM2     | KRT15    |
| SIX1     | KRT16    |
| SIX2     | KRT17    |
| SKI      | KRT2     |
| SLC23A1  | KRT25    |
| SLC4A2   | KRT27    |
| SLIT2    | KRT3     |
| SMAD1    | KRT31    |
| SMAD2    | KRT32    |
| SMAD3    | KRT34    |
| SMAD4    | KRT4     |
| SMAD5    | KRT5     |
| SMAD6    | KRT71    |
| SMAD7    | KRT76    |
| SMAD9    | KRT83    |
| SMO      | KRT84    |
| SOSTDC1  | KRT85    |
| SOX10    | KRT9     |
| SOX11    | KRTAP5-9 |
| SOX17    | LAMA3    |
| SOX18    | LAMA5    |
| SOX4     | LAMB2    |
| SOX8     | LAMB3    |
| SOX9     | LAMC2    |
| SP3      | LATS1    |
| SPARC    | LATS2    |
| SPDEF    | LBX1     |

|          |          |
|----------|----------|
| SPI1     | LCE1A    |
| SPINT1   | LCE1B    |
| SPRY1    | LCE1C    |
| SPRY2    | LCE1D    |
| SRC      | LCE1E    |
| SREBF1   | LCE1F    |
| SRF      | LCE2A    |
| SSBP3    | LCE2B    |
| ST14     | LCE2C    |
| STARD13  | LCE2D    |
| STAT1    | LCE3A    |
| STIL     | LCE3B    |
| STK3     | LCE3C    |
| STK4     | LCE3D    |
| STK40    | LCE3E    |
| STRA6    | LCE4A    |
| STX2     | LCE5A    |
| SUFU     | LCE6A    |
| T        | LCP1     |
| TAB1     | LDB1     |
| TACSTD2  | LDB2     |
| TBC1D20  | LEF1     |
| TBX1     | LELP1    |
| TBX2     | LFNG     |
| TBX20    | LGALS3   |
| TBX3     | LGR4     |
| TBX4     | LGR5     |
| TBX5     | LHFPL5   |
| TCF21    | LHX1     |
| TCF7     | LHX2     |
| TCTN1    | LIAS     |
| TFAP2B   | LIN7C    |
| TGFB1    | LMO4     |
| TGFB2    | LOR      |
| TGFB3    | LRP4     |
| TGFBR2   | LRP5     |
| TGM2     | LRP6     |
| THRA     | LRR72    |
| THRB     | LRTOMT   |
| TIMELESS | LTA4H    |
| TK1      | LUZP1    |
| TMBIM6   | MAF      |
| TMED2    | MAGI2    |
| TMEM107  | MAP2K1   |
| TNC      | MAP2K2   |
| TNF      | MAPK1    |
| TNS3     | MARVELD2 |

|          |         |
|----------|---------|
| TP63     | MCOLN3  |
| TRAF3IP1 | MED1    |
| TRAF4    | MED12   |
| TRAF6    | MEF2C   |
| TRIM71   | MEGF8   |
| TRPS1    | MEN1    |
| TSC1     | MEOX1   |
| TSC2     | MEOX2   |
| TULP3    | MESP1   |
| TWIST1   | MET     |
| TYMS     | MGMT    |
| UMOD     | MIB1    |
| VANGL2   | MICAL2  |
| VASP     | MITF    |
| VDR      | MKKS    |
| VEGFA    | MKS1    |
| VP52     | MLLT4   |
| WDR19    | MMP12   |
| WDR48    | MMP14   |
| WNK4     | MPP5    |
| WNT1     | MREG    |
| WNT11    | MSGN1   |
| WNT2     | MSN     |
| WNT3A    | MSX1    |
| WNT4     | MSX2    |
| WNT5A    | MTHFD1  |
| WNT6     | MTHFD1L |
| WNT7A    | MTSS1   |
| WNT7B    | MYADM   |
| WNT9B    | MYC     |
| WT1      | MYCN    |
| YAP1     | MYF5    |
| YIPF6    | MYF6    |
| ZEB1     | MYO1E   |
| ZEB2     | MYO5A   |
| ZFP36L1  | MYO7A   |
| ZFPM2    | NDRG4   |
| ZIC3     | NEUROD1 |
| ZNF358   | NEUROG3 |
|          | NF1     |
|          | NF2     |
|          | NFATC4  |
|          | NFIB    |
|          | NKX2-1  |
|          | NKX2-2  |
|          | NKX2-5  |
|          | NKX2-6  |



NKX3-1  
NKX3-2  
NKX6-1  
NKX6-3  
NLE1  
NODAL  
NOG  
NOTCH1  
NOTCH4  
NOTO  
NPHP3  
NPHS1  
NPHS2  
NPNT  
NR0B1  
NR2F2  
NR5A2  
NRARP  
NRG1  
NRP1  
NSDHL  
NTF4  
NTN1  
NTRK1  
NTRK3  
NUMA1  
NUMB  
NUP133  
NUP210L  
OCA2  
ONECUT1  
ONECUT2  
ORAI1  
OSR1  
OVOL1  
OVOL2  
PAFAH1B1  
PAK1  
PALB2  
PALLD  
PAX1  
PAX2  
PAX6  
PAX7  
PAX8  
PBX1  
PCDH8

PCNA  
PDCD10  
PDE2A  
PDE4D  
PDGFA  
PDGFB  
PDPK1  
PDX1  
PDZD7  
PECAM1  
PFN1  
PGF  
PGK1  
PHACTR4  
PHB2  
PHGDH  
PIH1D1  
PIP5K1A  
PITX2  
PITX3  
PKD1  
PKD2  
PLDN  
PLOD1  
PLOD3  
PLS3  
PLXNA1  
PLXNA2  
PLXNB2  
PLXND1  
PML  
PODXL  
POFUT1  
POU2F3  
POU3F1  
POU3F2  
POU3F3  
POU4F3  
PPARA  
PPARG  
PPHLN1  
PPL  
PPP1CA  
PPP1R16B  
PPP2R3A  
PRDM1  
PRICKLE1

PRKACA  
PRKACB  
PRKD2  
PRKDC  
PRKX  
PRLR  
PROM1  
PROX1  
PRR9  
PSAP  
PSAPL1  
PSEN1  
PTCH1  
PTCH2  
PTER  
PTHLH  
PTK6  
PTK7  
PTN  
PTPRO  
PTPRS  
RAB10  
RAB13  
RAB1A  
RAB1B  
RAB25  
RAB27A  
RAC1  
RAD51B  
RALA  
RAP1A  
RAP1B  
RAP2A  
RAP2B  
RAP2C  
RAPGEF1  
RAPGEF2  
RAPGEF3  
RAPGEF6  
RARA  
RARB  
RARG  
RASIP1  
RBBP6  
RBM15  
RBP2  
RBPJ

RDH10  
RDX  
RELA  
RET  
RFX3  
RFX6  
RGS19  
RGS20  
RHCG  
RHOA  
RHOB  
RHOC  
RILPL1  
RILPL2  
RIPK4  
RIPPLY1  
RIPPLY2  
RLTPR  
ROBO2  
ROCK1  
ROR2  
ROS1  
RPGRIP1L  
RPS7  
RSPO2  
RSPO3  
RXRA  
RZR2  
S100A7  
S1PR1  
SALL1  
SALL2  
SALL4  
SATB1  
SAV1  
SCEL  
SCNN1B  
SCRIB  
SCUBE1  
SCXB  
SDC1  
SDC4  
SEC24B  
SEMA3A  
SEMA3C  
SEMA3E  
SEMA4C

SERPINB5  
SERPINE2  
SETD2  
SETDB2  
SETP18  
SFN  
SFRP1  
SFRP2  
SHARPIN  
SHH  
SHROOM3  
SIDT2  
SIM1  
SIPA1L3  
SIX1  
SIX2  
SIX3  
SIX4  
SKI  
SKIL  
SLC40A1  
SLC4A5  
SLC4A7  
SLC7A11  
SLC9A3R1  
SLC9A4  
SLIT2  
SLITRK6  
SMAD1  
SMAD2  
SMAD3  
SMAD4  
SMAD5  
SMAD6  
SMAD7  
SMAD9  
SMO  
SNAI1  
SNAI2  
SOCS3  
SOD1  
SOS1  
SOSTDC1  
SOX10  
SOX11  
SOX17  
SOX18

SOX21  
SOX4  
SOX8  
SOX9  
SPDEF  
SPI1  
SPINK5  
SPINT1  
SPRR1A  
SPRR1B  
SPRR2A  
SPRR2B  
SPRR2D  
SPRR2E  
SPRR2F  
SPRR2G  
SPRR3  
SPRR4  
SPRY1  
SPRY2  
SRC  
SRF  
SSBP3  
ST14  
STARD13  
STAT1  
STAT6  
STC1  
STIL  
STK3  
STK4  
STRA6  
STRC  
STS  
STX2  
SUFU  
SULT1B1  
T  
TACSTD2  
TAGLN  
TAGLN2  
TBC1D20  
TBX1  
TBX2  
TBX20  
TBX3  
TBX4

TBX5  
TBX6  
TCAP  
TCF15  
TCF21  
TCF7  
TCHH  
TCTN1  
TDRD7  
TFAP2A  
TFAP2B  
TFCP2L1  
TGFB1  
TGFB1I1  
TGFB2  
TGFB2R2  
TGM1  
TGM2  
TGM3  
TGM5  
THRA  
THRB  
TIMELESS  
TJP1  
TJP2  
TMC1  
TMED2  
TMEFF2  
TMEM100  
TMEM107  
TMEM79  
TMOD1  
TNC  
TNFRSF19  
TNFSF11  
TNMD  
TOLLIP  
TOR1A  
TP63  
TPP1  
TRAF3IP1  
TRAF6  
TRIM28  
TRIM71  
TSC1  
TSC2  
TSG101

TST  
TULP3  
TWIST1  
TXNIP  
TYMS  
TYRP1  
UGCG  
UMOD  
UPK1A  
UPK1B  
UPK2  
UPK3A  
USH2A  
USP13  
VANGL2  
VASP  
VCL  
VDAC1  
VDR  
VEGFA  
VEGFC  
VEZF1  
VIL1  
VIM  
VSIG1  
WAS  
WDPCP  
WDR19  
WDR77  
WNK4  
WNT1  
WNT10A  
WNT11  
WNT16  
WNT2  
WNT3  
WNT3A  
WNT4  
WNT5A  
WNT5B  
WNT6  
WNT7A  
WNT7B  
WNT9B  
WT1  
XBP1  
XRCC2



YAP1  
YIPF6  
ZDHHC21  
ZEB2  
ZFP36L1  
ZIC3  
ZNF358  
ZNF703  
ZNF750

























regulation of cell population  
proliferation

GO:0042127

ABI1

ACVRL1

ADAMTS1

ADAMTS8

ADRA1A

ADRA1D

ADRA2A

AGGF1

AIF1

AIMP1

ALOX12

ALOX15B

ANG

APC

ARHGEF2

ATP8A2

ATPIF1

B4GALT7

BAI1

BAP1

BMI1

BMPR2

BNC1

BNIPL

BRCA1

BRCA2

BTC

BTG1

BTG2

BTG3

BTG4

CAPN1

CAPNS1

CCDC88A

CCKBR

CCL14

CCL23

CCL3L3

CD164

CD24

CD276

CD28

CD33

CD3E  
CD47  
CD81  
CD86  
CDC123  
CDC25B  
CDC6  
CDC7  
CDCA7  
CDH13  
CDK10  
CDK13  
CDK2  
CDK4  
CDK6  
CDKN1A  
CDKN1C  
CDKN2A  
CDKN2B  
CDKN2C  
CDKN2D  
CDKN3  
CGREF1  
CGRRF1  
CHEK1  
CHRM1  
CHRNA10  
CHRNA7  
CIAO1  
CLEC11A  
CNOT8  
COL18A1  
COL4A3  
CSF1  
CSF3  
CTBP1  
CTBP2  
CTF1  
CUL1  
CUL2  
CUL3  
CUL4A  
CUL5  
CXCL1  
CXCL10  
CXCL5  
CXCR2

DDX11  
43800  
DERL2  
DHPS  
DLEC1  
DLG5  
DNAJA2  
EBI3  
EDN1  
EEF1E1  
EGFR  
EGR4  
EID2  
EIF2AK2  
ELANE  
EMP3  
ENPP7  
EPGN  
ERBB2  
EREG  
ETS1  
FABP3  
FABP6  
FABP7  
FGF10  
FGF18  
FGF4  
FGF7  
FGFBP1  
FGFR1OP  
FIGF  
FLT1  
FLT3  
FLT3LG  
FLT4  
FOSL1  
FOXO4  
FOXP3  
FRK  
FTH1  
GAS8  
GHRL  
GLI1  
GLMN  
GLP2R  
GML  
GNL3

GNRH1  
GPNMB  
GPX1  
GTPBP4  
HCLS1  
HGS  
HOXC10  
HTR1A  
ICOSLG  
IFITM1  
IGF1  
IGF1R  
IGFBP6  
IGFBP7  
IL11  
IL12B  
IL12RB1  
IL12RB2  
IL15  
IL18  
IL1A  
IL1B  
IL2  
IL21  
IL27  
IL29  
IL3  
IL31RA  
IL4  
IL6  
IL7  
IL8  
IL9  
ING1  
ING4  
ING5  
INHA  
JAG2  
KAT2B  
KLF10  
KLF11  
KLF4  
KRT4  
LAMA1  
LAMB1  
LAMC1  
LDOC1



LIF  
LRP5  
LST1  
LYN  
MAGED1  
MARK4  
MATK  
MCTS1  
MDM2  
MDM4  
MFN2  
MNT  
MST1R  
MXD4  
MXI1  
MYC  
MYO16  
NAMPT  
NAP1L1  
NCK1  
NCK2  
NDN  
NDUFS4  
NF1  
NF2  
NME1  
NME2  
NOP2  
NOTCH2  
NOX4  
NPM1  
NRP1  
NUP62  
ODZ1  
OPRM1  
OSM  
PAWR  
PDF  
PDGFA  
PDS5B  
PGF  
PLG  
POU1F1  
POU3F2  
PPM1D  
PRKRA  
PRKRIR

PRTN3  
PTEN  
PTHLH  
PTK2B  
PTN  
PTPRC  
QSOX1  
RARRES1  
RARRES3  
RBBP4  
RBFox2  
REG1A  
REG  
RHOG  
RUNX3  
S100A11  
S1PR2  
S1PR3  
SCG2  
SCIN  
SERTAD1  
SESN1  
SFTPD  
SIRPG  
SLAMF1  
SPDYA  
SPEG  
SPHK1  
SSR1  
SST  
SSTR1  
SSTR2  
SSTR3  
SSTR4  
SSTR5  
STAMBP  
TBC1D8  
TBRG1  
TBRG4  
TBX2  
TBX3  
TBX5  
TCFL5  
TCIRG1  
TDGF1  
TGFA  
TGFB111

TGFB2  
TGFB1  
TGFB2  
TIMELESS  
TIMP1  
TIPIN  
TM4SF4  
TNFRSF11A  
TNFRSF8  
TNFRSF9  
TNFSF12  
TNFSF13  
TNFSF13B  
TNFSF15  
TNFSF4  
TOB1  
TOB2  
TP53I11  
TSC1  
TSHR  
TSPAN31  
TTK  
UMOD  
UTP20  
VEGFA  
VEGFB  
VHL  
VIP  
VIPR1  
WARS

| Name     | Description | TCGA.23.1021 | TCGA.23.1022 | TCGA.23.1023 | TCGA.23.1024 | TCGA.23.1026 |
|----------|-------------|--------------|--------------|--------------|--------------|--------------|
| blood.v  | GO:0048514  | -492.5274251 | -315.8190508 | 200.8085335  | -1007.966206 | -171.6518984 |
| vascula  | GO:0001944  | -401.6006367 | -314.4968188 | 262.06133    | -789.9139612 | -22.51441848 |
| regulati | GO:0045595  | -802.6344428 | -704.7038512 | -375.3899981 | -1008.459306 | -625.6083011 |
| regulati | GO:0051249  | -2059.681434 | -1055.965202 | -2323.290465 | -1859.177106 | -1195.778053 |
| T.cell.r | GO:0050852  | -3114.860263 | -1099.248708 | -2208.293219 | -2249.715246 | -2453.736863 |
| lympho   | GO:0031294  | 40.61187283  | 1382.012486  | -529.0318644 | -215.977681  | 980.8650216  |
| regulati | GO:0050776  | 2853.593807  | 3048.843628  | 2811.752314  | 3347.2125    | 2825.758772  |
| immun    | GO:0002376  | 2545.23554   | 2118.187008  | 2673.403556  | 2534.908179  | 2702.494723  |
| positive | GO:0002857  | -1021.085882 | -1167.435894 | 1474.322515  | 1048.501604  | -1434.192715 |
| humor    | GO:0006959  | 34.73691593  | 617.0781046  | -971.6093466 | -803.0302389 | -80.59187748 |
| positive | GO:0050870  | 238.9420738  | 2067.337051  | -1228.621797 | 1978.977987  | 906.4797321  |
| mitotic  | GO:0072686  | 1389.403704  | 2322.82883   | 2016.83561   | 2053.742405  | 1658.08396   |
| positive | GO:0048522  | 209.6480645  | -297.4756732 | 534.403952   | 328.3853223  | 1108.027291  |
| negativ  | GO:0050672  | -1200.504814 | -1243.211747 | -1119.091134 | -1474.778766 | -738.2618844 |
| cell.sub | GO:0031589  | 70.08632875  | -195.4876597 | 437.698461   | -529.6616535 | 372.0282885  |
| cell.adh | GO:0007155  | -3855.751669 | -3842.351699 | -3624.178329 | -4338.66542  | -4607.027866 |
| biologic | GO:0022610  | -1138.036479 | -1141.786516 | -634.4789425 | -1520.725742 | -811.8888437 |
| regulati | GO:1901342  | -499.1832361 | -660.1535903 | 227.2845032  | -974.9024974 | 62.44933732  |
| angioge  | GO:0001525  | -496.1672663 | -364.4000801 | 234.8492727  | -1032.335899 | -145.5894571 |
| epitheli | GO:0030855  | -591.678643  | -197.9109671 | -35.98191635 | -745.6358359 | -364.874151  |
| epitheli | GO:0060429  | -667.8627404 | -394.135853  | -215.1870517 | -738.7844828 | -460.5582402 |
| regulati | GO:0042127  | -714.3169803 | -663.1766053 | -310.4121859 | -703.4428933 | -280.4601755 |

| TCGA.23.1027 | TCGA.23.1028 | TCGA.23.1029 | TCGA.23.1030 | TCGA.23.1031 | TCGA.23.1032 | TCGA.23.1107 |
|--------------|--------------|--------------|--------------|--------------|--------------|--------------|
| -26.05990963 | -595.4262067 | -505.2329531 | -117.7485345 | -415.63443   | -1113.677622 | -721.678417  |
| 49.23817499  | -374.6556046 | -341.7897339 | 9.06721748   | -322.9281002 | -855.3159987 | -499.9445624 |
| -563.7733337 | -722.4765754 | -769.0315816 | -523.0691816 | -600.4872324 | -1052.034485 | -738.2757046 |
| -1064.584854 | -2435.904392 | -1533.030909 | -1718.881482 | -2512.407214 | -2094.795698 | -1710.0132   |
| -2373.490091 | -2386.574276 | -2595.110562 | -2695.663412 | -2924.393522 | -1526.247779 | -2479.074534 |
| 1199.051061  | -976.453364  | 262.5890082  | -68.43085374 | -952.2660269 | -479.40823   | -40.01650118 |
| 2827.639672  | 3002.808615  | 2963.328165  | 2736.978973  | 2763.84779   | 3180.481255  | 3216.586917  |
| 2648.58296   | 2592.452814  | 2774.925607  | 2543.817021  | 2370.414959  | 2586.066187  | 2571.010364  |
| 564.0058657  | 473.7724959  | 219.6785982  | -1384.679514 | 201.2888141  | 646.5423791  | -678.8849925 |
| -704.5119153 | -528.0567878 | -315.5227815 | -1059.49724  | -1558.758028 | -586.1742304 | -689.1421865 |
| 1694.394954  | 413.3566551  | 1073.995938  | 850.5724235  | 1832.101229  | 1640.374836  | 1261.641038  |
| 2018.337948  | 2025.381819  | 2256.875967  | 1987.687389  | 2257.437763  | 2190.819009  | 2500.381707  |
| 944.230531   | -315.7085357 | 253.1294322  | 848.8401789  | -769.420918  | -407.2041434 | 805.7204255  |
| -693.9161832 | -1209.742898 | -461.2904157 | -53.74499633 | -1768.460654 | -697.7657972 | -336.8513254 |
| 88.3897407   | 6.857017777  | -141.5997281 | 292.7505076  | -2.378947196 | -435.641708  | -110.7881822 |
| -4455.741443 | -4566.364752 | -4216.778638 | -4569.672064 | -4542.887452 | -3791.171401 | -4072.863679 |
| -964.7523499 | -1094.069503 | -1185.289207 | -880.3808298 | -1118.66333  | -1529.468332 | -1255.485187 |
| 16.32832497  | -444.4607519 | -488.8302892 | -203.0823375 | -574.8210085 | -930.2928083 | -805.1697613 |
| -90.49644794 | -607.927261  | -621.0508814 | -131.9278529 | -522.1282835 | -1043.193665 | -706.2785731 |
| -274.3484212 | -487.6192835 | -439.9945656 | -225.7355516 | -271.5108641 | -586.0486142 | -337.7007424 |
| -450.937526  | -516.0705591 | -516.1139264 | -383.7933107 | -437.8981733 | -803.622239  | -585.1058288 |
| -174.8808904 | -222.8223487 | -398.9848133 | -242.3892449 | -637.9994844 | -728.0063975 | -718.0928083 |

| TCGA.23.1109 | TCGA.23.1110 | TCGA.23.1111 | TCGA.23.1113 | TCGA.23.1114 | TCGA.23.1116 | TCGA.23.1117 |
|--------------|--------------|--------------|--------------|--------------|--------------|--------------|
| -269.6311391 | -559.7971114 | -426.1174822 | -440.1077598 | 123.0341586  | 312.0968969  | 292.9731323  |
| -118.1064538 | -516.5702463 | -223.6396369 | -257.8190065 | 237.0906351  | 447.9882991  | 404.171226   |
| -551.1852371 | -859.3592454 | -667.0829998 | -699.5862744 | -448.7113767 | -378.3993944 | -361.1417767 |
| -1716.988938 | -3147.088888 | -1563.920791 | -1954.635191 | -2868.11186  | -1472.876484 | -1355.91963  |
| -2576.160312 | -3407.35328  | -1352.581302 | -3043.093435 | -2682.011397 | -2752.974339 | -2921.786884 |
| 326.2145121  | -2942.585268 | 1334.826268  | -1570.924766 | -1323.026792 | 818.3590268  | 712.4875737  |
| 2661.254299  | 2682.387963  | 2902.002817  | 2895.907322  | 2454.929277  | 3068.30078   | 2675.922441  |
| 2362.669135  | 2006.124499  | 2777.397008  | 2240.44797   | 2115.823393  | 2818.15857   | 2482.479723  |
| -1990.862203 | -830.7366192 | -20.12693113 | -339.8361509 | 306.3504863  | 508.8058009  | 465.7954441  |
| -867.6453216 | -1257.00034  | 373.8846492  | -815.1174103 | -675.0539254 | -1108.631365 | -315.3744219 |
| 938.1836186  | 1722.170127  | 696.1728276  | 1678.502264  | 1282.213001  | -39.37913131 | 139.144814   |
| 2675.78972   | 2257.043751  | 1701.403074  | 2420.424262  | 2215.593517  | 2001.351608  | 2290.424028  |
| -140.2610948 | -94.87807337 | -905.9988084 | -264.2206978 | -18.59962801 | 555.7684031  | 134.6542942  |
| -1862.896194 | -3422.631777 | 162.8675951  | -1930.423306 | -1235.813374 | -240.14264   | -1696.325942 |
| 332.7389797  | -252.0200352 | 304.3155682  | 258.912548   | 190.9878379  | 611.5633761  | 912.5325321  |
| -4364.856223 | -4519.642233 | -4439.970505 | -4349.993548 | -3979.177561 | -4329.47559  | -4479.867002 |
| -916.4221206 | -1394.076702 | -1033.232237 | -1058.735192 | -911.1076862 | -473.3269818 | -533.5268835 |
| -280.8865646 | -1013.52542  | -507.6589724 | -578.3714323 | 7.486420638  | 289.5058711  | 422.9465782  |
| -364.9468849 | -721.489347  | -484.3484949 | -417.7106293 | 12.9772884   | 355.5391474  | 355.2721945  |
| -199.4592524 | -293.1806855 | -277.7696828 | -324.4028219 | 137.788028   | -17.96738806 | -93.67658195 |
| -570.6490318 | -459.0160662 | -441.8545972 | -619.0240308 | -189.2989297 | -244.5198794 | -314.9479709 |
| -515.2328675 | -666.6298582 | -519.6305952 | -698.0906679 | -518.3265576 | -172.1294624 | -350.0257647 |

| TCGA.23.1118 | TCGA.23.1119 | TCGA.23.1120 | TCGA.23.1121 | TCGA.23.1122 | TCGA.23.1123 | TCGA.23.1809 |
|--------------|--------------|--------------|--------------|--------------|--------------|--------------|
| -420.4655201 | -398.2612625 | -257.6821025 | -263.133333  | -326.1555897 | -666.7844924 | -509.5640417 |
| -318.1864813 | -267.538966  | -125.6051536 | -106.6651889 | -198.6888967 | -564.2509025 | -358.2036469 |
| -728.0914306 | -730.1667904 | -621.4080758 | -604.1620972 | -589.3331414 | -860.0432978 | -764.0862287 |
| -1152.056898 | -1693.603982 | -859.4896366 | -1928.363877 | -1433.820882 | -792.7871388 | -1341.278188 |
| -2077.062785 | -3017.723075 | -2746.465073 | -1553.016275 | -2737.004434 | -2574.906391 | -1443.848251 |
| 1433.255458  | 89.04295559  | 635.7616195  | -559.0972651 | 381.9380708  | 1402.622     | 655.9596129  |
| 3083.766626  | 2791.316558  | 2942.820573  | 2942.053177  | 2520.430931  | 3032.482991  | 2762.121183  |
| 2558.361042  | 2547.949199  | 2634.331719  | 2431.05411   | 2433.70815   | 2639.650218  | 2444.128792  |
| -460.6687158 | -1276.927696 | -1353.464452 | 311.6300588  | -987.9276133 | -1218.388312 | 731.5867368  |
| -716.1454896 | -312.2334743 | -644.9854639 | -172.5878726 | -1026.092477 | -1410.344179 | -1020.748056 |
| 1588.653345  | -1253.328746 | 2729.333709  | 1808.824782  | 1167.887709  | 1660.160163  | -2920.295061 |
| 2164.515128  | 1685.270629  | 1826.783779  | 2398.997266  | 2470.529863  | 1988.103631  | 2339.28246   |
| 559.712679   | 503.1272973  | 966.3979747  | -608.9158773 | 808.5080797  | 538.8063046  | 1190.781316  |
| -1561.187932 | -2353.262966 | -622.5878207 | -1833.616611 | -1281.849676 | -1338.573921 | -3223.194414 |
| 59.99624417  | 49.60198804  | 354.0153797  | 167.9147256  | 300.5937502  | -209.0024782 | -235.16011   |
| -4301.891428 | -4259.101707 | -4234.72348  | -3319.766429 | -4520.32519  | -4608.965857 | -4080.987552 |
| -1077.057156 | -976.1416208 | -845.2271623 | -1103.899832 | -963.5895501 | -1237.302094 | -1128.436818 |
| -427.0783666 | -395.7468327 | -299.4031047 | -579.6420153 | -393.3737052 | -506.7818851 | -403.1217814 |
| -328.3780508 | -363.4881637 | -268.1643859 | -308.4810571 | -310.0723089 | -694.6143372 | -588.0895814 |
| -450.9176632 | -381.7000768 | -357.600801  | 98.79000927  | -329.9212371 | -592.0948064 | -263.7723701 |
| -643.3710162 | -601.2262217 | -533.5949516 | -266.5163743 | -434.8517109 | -792.5808498 | -501.5065642 |
| -441.9615576 | -635.0218197 | -334.9191706 | -648.2565032 | -374.1668247 | -557.2320912 | -406.4402915 |

| TCGA.23.2072 | TCGA.23.2077 | TCGA.23.2078 | TCGA.23.2079 | TCGA.23.2081 | TCGA.23.2084 | TCGA.25.1312 |
|--------------|--------------|--------------|--------------|--------------|--------------|--------------|
| -136.8122751 | -562.1354967 | 185.6116426  | -464.8580165 | -77.15358743 | -487.7047732 | -508.0459736 |
| 67.34474762  | -427.8047586 | 284.7387873  | -293.19213   | 116.2336475  | -298.0463875 | -340.4026329 |
| -541.7079311 | -736.7151463 | -444.3638484 | -660.7281576 | -607.1393742 | -831.9414425 | -779.6135824 |
| -1338.162515 | -867.5771427 | -1446.289641 | -368.356893  | -2009.615949 | -1068.127066 | -1214.964622 |
| -2140.543672 | -1801.179122 | -2479.318365 | -899.2001787 | -2969.269355 | -2385.604408 | -2468.817862 |
| 928.605369   | 2290.863628  | 676.8806716  | 2762.816681  | -506.4765048 | 1953.536679  | 512.5102522  |
| 2957.539721  | 2801.94939   | 2743.813712  | 2494.859235  | 2756.250776  | 3239.633244  | 3017.030076  |
| 2380.142615  | 2798.613151  | 2566.187225  | 2541.658897  | 2579.93356   | 2819.341977  | 2496.477081  |
| 133.0191459  | -1459.014567 | 363.2839671  | -2315.897427 | -822.1004341 | 124.2698423  | 676.3026834  |
| -1182.329251 | -475.1383372 | -804.62917   | -472.3189529 | -263.7451464 | -591.8885192 | -399.1525863 |
| -79.63401557 | 926.4512545  | 790.5614019  | -1472.652517 | 888.0230841  | 1687.114886  | -1691.686119 |
| 1451.908916  | 1700.90095   | 2377.188151  | 2102.07113   | 2002.17996   | 2159.580863  | 1860.698673  |
| 921.5195534  | 1051.810015  | 1430.356865  | 974.8875681  | -95.75823466 | 1685.174175  | 63.97832187  |
| -556.4872353 | -1082.660609 | -1087.522763 | -232.9089221 | -755.8926744 | -481.7435502 | -1307.783206 |
| 657.2058971  | -62.06058434 | 408.9083582  | 80.95523357  | 627.073355   | 342.561522   | -135.0799374 |
| -4457.709339 | -4301.971457 | -3760.509988 | -4607.683555 | -4800.151434 | -4475.891801 | -4322.920406 |
| -863.3269009 | -1180.532766 | -614.0198824 | -925.9232872 | -890.3449508 | -1078.459658 | -1264.959149 |
| -107.4980167 | -375.5354085 | 58.38237011  | -308.6661409 | -191.4673612 | -365.185774  | -414.5369732 |
| -129.826613  | -621.7786668 | 170.9970599  | -536.0305916 | -105.496411  | -442.4958305 | -518.6986621 |
| -132.0312147 | -592.0292522 | -197.6025496 | -500.7485647 | -323.3072366 | -545.4847835 | -397.2028709 |
| -303.0987321 | -688.3814505 | -364.9059707 | -645.8693808 | -360.3035348 | -567.1791845 | -512.5954978 |
| -355.7765132 | -464.4240554 | -465.2142056 | -471.4639649 | -642.5443061 | -476.5352624 | -500.8345733 |



| TCGA.25.1313 | TCGA.25.1314 | TCGA.25.1315 | TCGA.25.1316 | TCGA.25.1317 | TCGA.25.1318 | TCGA.25.1319 |
|--------------|--------------|--------------|--------------|--------------|--------------|--------------|
| -339.3000816 | -535.3357268 | -754.7332362 | -467.2133153 | -114.4331065 | -176.0185869 | -603.286838  |
| -203.6882647 | -404.8584349 | -571.2332555 | -294.8430369 | 24.69833798  | -18.10772623 | -547.9576164 |
| -593.841028  | -774.9096437 | -944.2693758 | -541.4625397 | -521.0380295 | -552.0632342 | -822.6635803 |
| -1319.509853 | -1185.933054 | -2496.026273 | -2372.250674 | -1569.986329 | -1531.04908  | -1240.566771 |
| -3363.129866 | -2149.968746 | -3108.67189  | -2803.403867 | -1543.738108 | -3202.964788 | -3104.06916  |
| 1302.965783  | 884.849774   | -1237.456081 | -1287.11599  | 407.136665   | -528.5494069 | 234.1272073  |
| 2730.224779  | 2317.82038   | 2881.390192  | 2723.360015  | 2568.007666  | 2757.621164  | 3036.684308  |
| 2674.478134  | 2542.985046  | 2582.993391  | 2381.490984  | 2404.581959  | 2609.104998  | 2985.640626  |
| -70.6977695  | -881.2540236 | -1515.760538 | -3033.777868 | 91.88568625  | 736.1159569  | -2087.02237  |
| -267.6401306 | 158.2156932  | -834.4839275 | 616.6446749  | 1.003843474  | -712.6016498 | -725.2260113 |
| -1677.229805 | 335.352537   | 1221.337571  | -467.6824082 | 213.5416865  | 146.1472609  | 1398.585556  |
| 1655.993145  | 1734.431419  | 1788.631324  | 2090.244119  | 1879.429007  | 1776.687007  | 1746.923269  |
| 1066.529883  | 572.5611512  | -39.22785836 | -357.0452862 | -510.4297453 | 134.4189502  | -807.4366868 |
| -135.5973065 | -912.2994347 | -2160.312172 | -3053.372362 | -2011.028646 | -1298.458347 | -1020.123964 |
| 190.009045   | -27.61965824 | -296.916887  | -354.9590989 | 152.504459   | 149.5061452  | -288.1361258 |
| -3945.117427 | -4501.331341 | -4204.299255 | -2655.259886 | -3940.378022 | -4762.649155 | -4103.176487 |
| -911.7968966 | -1159.597993 | -1516.749359 | -1103.016503 | -896.304263  | -912.0639866 | -1245.899638 |
| -379.0832464 | -323.942372  | -926.4866886 | -607.3304315 | -380.2985357 | -36.48283678 | -475.5097203 |
| -373.3009211 | -525.3209602 | -834.2654808 | -471.5716423 | -203.1662514 | -103.4618676 | -675.3837222 |
| -490.7142718 | -616.9655111 | -430.4152831 | -231.1535802 | -4.916650548 | -291.1129039 | -557.5782222 |
| -571.6711745 | -655.9718466 | -510.5426892 | -415.0309131 | -220.5695831 | -413.0387877 | -697.3142407 |
| -471.7083841 | -582.7891712 | -787.9553959 | -663.6840349 | -626.7634752 | -427.0877088 | -599.8158987 |

| TCGA.25.1320 | TCGA.25.1321 | TCGA.25.1322 | TCGA.25.1323 | TCGA.25.1324 | TCGA.25.1325 | TCGA.25.1326 |
|--------------|--------------|--------------|--------------|--------------|--------------|--------------|
| 13.2447493   | -574.3444263 | -90.80180712 | -287.6811965 | -965.5833225 | -608.6529004 | -48.81598321 |
| 157.5744539  | -490.9914343 | 100.1605269  | -125.3000178 | -775.5762314 | -410.5901338 | 140.7076379  |
| -511.6172178 | -809.2014973 | -628.0121756 | -676.712571  | -767.9466802 | -842.4862565 | -595.5056847 |
| -1488.377853 | -1039.890653 | -1321.302154 | -1939.268212 | -3088.919799 | -1920.961415 | -955.5508318 |
| -2985.727056 | -2165.241466 | -3035.497233 | -2880.167669 | -2940.439207 | -3378.199404 | -3270.134798 |
| 238.9964211  | 579.1669396  | 404.9779311  | -641.9907227 | -1930.598894 | -1076.179714 | 1258.140518  |
| 2936.18776   | 2883.925906  | 2898.447609  | 2937.702876  | 2739.359977  | 3089.471549  | 2988.716582  |
| 2743.761691  | 2748.620796  | 2681.401909  | 2372.519886  | 2358.054556  | 2620.857368  | 2613.267479  |
| 1691.217228  | 345.7685141  | -213.5501761 | -487.6800252 | -259.0818506 | -1364.434505 | 657.0111685  |
| -374.293224  | -251.5433356 | -408.221014  | -340.9945995 | -798.0702285 | -110.2137037 | -558.8828479 |
| 1205.894306  | 814.9776096  | 1607.640099  | -1001.189435 | 2070.850477  | 1207.131105  | -832.7190188 |
| 2081.081513  | 1939.810322  | 2315.587771  | 1728.585175  | 2122.810936  | 2129.438837  | 1685.619793  |
| -234.3817893 | 830.7166529  | 120.2022923  | 333.0195915  | -1062.398178 | 821.1288915  | 823.234025   |
| -1262.846792 | -1265.618134 | -930.7386314 | -1654.100267 | -2966.694404 | -2075.165587 | -971.4378685 |
| 372.5796134  | -131.581644  | 185.5018511  | 159.5886664  | -375.1746922 | 148.6132366  | 432.2718242  |
| -4057.823485 | -4348.389988 | -4241.663302 | -4349.912926 | -4192.85221  | -4700.588489 | -4619.207937 |
| -808.9140158 | -1237.64279  | -927.6820843 | -1147.547287 | -1255.178038 | -1204.838489 | -802.3948518 |
| 212.6876446  | -712.8343726 | -64.15685863 | -504.7571727 | -1008.2103   | -751.8772033 | 30.45400895  |
| 19.36624774  | -562.0609607 | -117.2466531 | -272.5741056 | -1045.942333 | -602.0008677 | -38.02476324 |
| -184.704789  | -576.6018083 | -183.8750122 | -189.0370239 | -419.936947  | -574.6424905 | -289.0641363 |
| -462.1653517 | -595.7615299 | -457.5643667 | -366.5324641 | -636.9739816 | -771.8477152 | -443.6473973 |
| -416.2553929 | -698.2970049 | -292.5823263 | -504.8052728 | -880.7574405 | -764.4751723 | -455.3902823 |

| TCGA.25.1328 | TCGA.25.1329 | TCGA.25.1623 | TCGA.25.1625 | TCGA.25.1626 | TCGA.25.1627 | TCGA.25.1628 |
|--------------|--------------|--------------|--------------|--------------|--------------|--------------|
| -36.47772871 | -202.7590368 | 237.2703122  | -199.1504515 | 505.7298209  | -389.2823871 | 95.93497824  |
| 134.5292393  | 38.04355187  | 355.5533051  | -15.17811649 | 619.9876043  | -254.197445  | 222.2392464  |
| -384.2501563 | -541.0359347 | -386.7775293 | -501.7221839 | -181.1198736 | -625.6538211 | -397.0047574 |
| -1090.691561 | -1147.391293 | -189.7462462 | -789.6760488 | -753.4844458 | -1262.931596 | -259.3574942 |
| -2487.284303 | -2788.635864 | -624.3491232 | -1968.184964 | -1875.495131 | -1719.419782 | -794.8196535 |
| 404.0178578  | 890.8275881  | 2796.442211  | 2385.981259  | 2734.9178    | 1051.63538   | 2981.073022  |
| 2380.490507  | 2893.216664  | 2975.835784  | 2782.017215  | 2830.367283  | 3276.757237  | 2477.539983  |
| 2182.533364  | 2647.100893  | 2781.540002  | 2514.031558  | 2667.097355  | 2648.352665  | 2659.320631  |
| -981.0329825 | 2147.448288  | -864.9967809 | -1069.196239 | -194.2919377 | -422.1783878 | -495.6258851 |
| -605.1885768 | 443.468826   | -196.2473825 | 480.6737853  | -437.5470565 | -811.418924  | -847.7759474 |
| -1583.251602 | -1609.111228 | 1514.358069  | 27.12784224  | 300.2312052  | 1176.887604  | 1540.731452  |
| 1383.836082  | 1930.725612  | 2318.487716  | 1684.989925  | 2173.667394  | 2263.16842   | 2336.390466  |
| -389.4212778 | 707.3641348  | 367.519585   | 739.4921625  | 979.1670895  | -164.8736125 | 966.0897401  |
| -953.1267015 | -643.2350432 | -249.625524  | -375.2119859 | -664.3219044 | -1998.030482 | -1408.246081 |
| 526.6842169  | 382.1692753  | 484.2745879  | 343.7503778  | 809.8533277  | -315.254218  | 534.1935351  |
| -3573.157277 | -4285.705784 | -4932.6734   | -4277.646161 | -4224.109759 | -4249.613158 | -4356.585057 |
| -554.9665392 | -859.8997091 | -487.3386745 | -745.7780343 | -177.2248009 | -1144.558883 | -574.3075889 |
| 10.00288379  | -75.37575947 | 326.1312746  | -81.52376664 | 629.2121318  | -666.2661437 | -5.500317392 |
| -105.3937782 | -241.1988348 | 258.0956335  | -173.1765284 | 491.0964516  | -506.5236874 | 66.98605862  |
| -102.2534213 | -245.4441069 | -103.8962646 | -352.4434879 | -6.436273476 | -261.8651378 | -132.56089   |
| -291.9762333 | -519.3971105 | -303.0930668 | -436.055119  | -177.6953792 | -342.3726251 | -351.7736339 |
| -497.2711618 | -594.0246794 | -205.7699947 | -450.5678038 | -158.8512537 | -549.9710718 | -346.599686  |

| TCGA.25.1630 | TCGA.25.1631 | TCGA.25.1632 | TCGA.25.1633 | TCGA.25.1634 | TCGA.25.1635 | TCGA.25.1870 |
|--------------|--------------|--------------|--------------|--------------|--------------|--------------|
| -340.8471674 | -286.3445381 | -354.3710028 | -35.87610858 | -548.6615769 | -213.0396187 | -402.7238093 |
| -212.08458   | -145.3017939 | -250.1745663 | 173.1608722  | -404.6616952 | 41.84305084  | -238.2167948 |
| -652.468676  | -714.3449963 | -590.3424323 | -374.8608497 | -645.0415153 | -368.3829444 | -635.3400637 |
| -834.0081934 | -1051.897098 | -2870.03059  | -593.0950276 | -2684.207875 | -657.3053486 | -1082.383679 |
| -2640.469866 | -2110.81066  | -3131.322335 | -1615.641717 | -2893.616676 | -1743.557295 | -2356.440998 |
| 1181.700226  | 1266.991934  | -1857.850965 | 2781.393558  | -1460.579658 | 2385.359252  | 1536.527398  |
| 3065.289291  | 2986.16289   | 2731.803432  | 2401.604111  | 2520.395913  | 3049.228552  | 2712.515157  |
| 2792.017741  | 2704.772154  | 2429.621168  | 2593.099414  | 2110.185704  | 2746.44724   | 2598.498432  |
| -994.8212214 | -548.3899915 | 1789.885085  | 423.6919068  | -210.0477446 | -1549.202244 | -1839.023821 |
| 116.4474287  | -166.8141379 | -506.949635  | -107.2870909 | -124.2432503 | -1182.964453 | -296.6410849 |
| 1699.499098  | -70.88322069 | 2215.197144  | -2444.071358 | 1084.81771   | 2625.410967  | 1919.68775   |
| 1937.236619  | 2068.207231  | 1801.071313  | 1730.873444  | 2209.480978  | 2381.69314   | 1564.432852  |
| 775.6649842  | -59.58661078 | -554.5017192 | 759.0255307  | 299.4594394  | 908.9281266  | 481.0911959  |
| 115.991068   | -599.453433  | -2993.886584 | -675.2432506 | -1102.188985 | -651.4484352 | -966.1839954 |
| 447.8700783  | 229.5647654  | -63.47021094 | 640.4367269  | -181.7532795 | 250.4594022  | -59.66178439 |
| -4061.644416 | -4547.29079  | -4581.081491 | -4228.668334 | -4409.494104 | -4177.362347 | -4364.776676 |
| -868.6823459 | -1095.120742 | -1133.520133 | -472.6202615 | -1161.572169 | -761.543928  | -1082.215656 |
| -236.1029469 | -480.5887949 | -705.3218062 | 234.1148781  | -1224.493532 | -142.5108833 | -435.4888897 |
| -311.6438627 | -342.8612349 | -440.8261693 | -84.95121653 | -517.9148289 | -312.1224243 | -467.7736705 |
| -437.2097579 | -250.4228094 | -266.0951165 | -81.58495561 | -218.2630995 | -126.2166257 | -275.2037133 |
| -460.7795551 | -347.4981895 | -309.2741622 | -156.5045669 | -280.6431018 | -431.5725342 | -540.0259009 |
| -81.03052096 | -535.681939  | -496.1073495 | -350.2710552 | -799.8943092 | -460.6023915 | -620.0418856 |

| TCGA.25.1871 | TCGA.25.1877 | TCGA.25.1878 | TCGA.25.2042 | TCGA.25.2391 | TCGA.25.2392 | TCGA.25.2393 |
|--------------|--------------|--------------|--------------|--------------|--------------|--------------|
| -525.9340074 | -725.8635056 | -633.3172039 | 806.3398121  | -580.6963589 | -690.3410489 | -763.4642636 |
| -420.8666885 | -582.9412431 | -529.4783775 | 979.7528534  | -446.6502618 | -505.221798  | -538.4569997 |
| -730.503829  | -659.8706972 | -816.4398171 | -158.3997074 | -791.1899442 | -722.3564264 | -822.3987547 |
| -2697.14074  | -820.1751809 | -157.9078558 | -1284.550707 | -622.6200188 | -952.9124689 | -2025.704543 |
| -2919.655562 | -2131.513333 | -1419.6079   | -2346.545611 | -1577.86213  | -3769.732409 | -2648.678027 |
| -1625.422443 | 1008.074328  | 1103.691916  | 1830.690092  | 1733.421141  | 2310.491718  | -866.7841511 |
| 2128.941494  | 2856.732648  | 2985.784502  | 2391.743005  | 2872.278016  | 2836.296133  | 2914.228299  |
| 2079.815631  | 2658.822858  | 2903.764591  | 2361.592067  | 2791.612903  | 2978.479207  | 2352.042462  |
| -1931.763774 | -3638.541037 | -2986.438012 | 150.5234694  | -197.7944934 | -837.0822752 | -1456.884863 |
| -303.8813723 | 786.5596948  | -611.1225081 | -688.3453989 | 332.9004399  | 666.9103856  | -322.3779743 |
| -1627.742203 | -1622.528946 | 869.1844305  | -833.0650281 | 1359.928156  | -1006.580255 | -21.8771031  |
| 2354.546532  | 1681.61013   | 1260.126444  | 1991.550361  | 1986.27934   | 1900.627259  | 2243.735786  |
| -595.8474182 | 673.3648167  | 918.9634763  | 722.6079738  | 866.2913986  | 1591.662018  | 1257.135302  |
| -3530.601778 | -2433.243814 | -155.0829841 | -1784.148757 | -458.9398941 | -809.7034518 | -3072.96371  |
| -95.19068999 | -378.9141728 | -93.35571197 | 958.094237   | -76.43336853 | -180.4925557 | -568.5059503 |
| -4448.103541 | -4391.635695 | -4067.405851 | -4479.578989 | -4494.118862 | -4381.30947  | -4198.071574 |
| -1340.601902 | -1342.997991 | -958.9170586 | -240.3271054 | -1123.03172  | -1047.742958 | -1233.885822 |
| -842.2005075 | -585.231752  | -367.7222872 | 1087.02398   | -360.9401878 | -508.2052695 | -737.0747589 |
| -650.9795078 | -785.8963546 | -560.1060165 | 835.8764682  | -693.6498769 | -669.3750538 | -873.9849129 |
| -116.3685758 | -282.9409838 | -775.7389051 | 181.8189681  | -547.3536026 | -638.8071645 | -277.0390247 |
| -431.7630059 | -488.6965526 | -807.4565446 | -32.86514208 | -505.9239724 | -620.6864679 | -546.6035209 |
| -744.0356807 | -678.627955  | -436.5033052 | -163.5442307 | -267.5122264 | -373.3156645 | -564.7661892 |

| TCGA.25.2396 | TCGA.25.2397 | TCGA.25.2398 | TCGA.25.2399 | TCGA.25.2400 | TCGA.25.2401 | TCGA.25.2404 |
|--------------|--------------|--------------|--------------|--------------|--------------|--------------|
| -700.727721  | -601.773762  | 199.0991157  | -178.2135724 | -778.2209699 | 129.2190716  | 33.70002298  |
| -534.698108  | -474.6164995 | 341.0039265  | -45.69050607 | -526.0335147 | 269.8891298  | 215.2529446  |
| -797.3085682 | -874.7894615 | -291.4476432 | -624.6142631 | -765.3558649 | -539.6264    | -584.9977942 |
| -1541.719453 | -1431.517194 | -1728.778604 | -915.5914863 | -1259.280116 | -839.383529  | -1334.27908  |
| -3249.863767 | -2977.631462 | -2788.974539 | -2068.453742 | -2098.316129 | -2813.235745 | -2263.460955 |
| 840.0163596  | 250.8908378  | 140.9493696  | 1130.060961  | 1385.258272  | 1468.763956  | 1259.420189  |
| 3002.768552  | 2884.502498  | 2770.664179  | 2775.634317  | 2992.180228  | 3321.834602  | 2571.671333  |
| 2791.690351  | 2648.441868  | 2527.306493  | 2804.895387  | 2575.602146  | 2872.39156   | 2728.088539  |
| -1138.894959 | 743.1285653  | -73.50798635 | -1630.142331 | -2815.772301 | -815.3900492 | -512.4044738 |
| -262.1212442 | -756.8069083 | -967.2428872 | -886.6882916 | -332.4935595 | -34.24727152 | -330.9631019 |
| 443.9633261  | 903.5373055  | -1039.237908 | -1223.288097 | 488.8988102  | 1754.24396   | 450.1800337  |
| 2163.61547   | 1646.078206  | 2208.403136  | 2143.675821  | 2118.62528   | 2004.735046  | 2297.156703  |
| 348.3668143  | 653.7508229  | 60.88206915  | 795.4089935  | 1007.370317  | 879.7446917  | 548.293222   |
| -698.3287699 | -2003.573438 | -1471.024424 | -864.94376   | -1608.672789 | 619.7949803  | -45.11772962 |
| 52.3989806   | -0.21231174  | 498.4907505  | 223.4104201  | -462.0424626 | 400.7867177  | 541.0990494  |
| -4377.393099 | -4472.826579 | -4026.847181 | -4732.210559 | -3795.894266 | -4628.655597 | -4630.356443 |
| -1103.957044 | -1146.949028 | -529.8563335 | -903.5559867 | -1396.976918 | -633.3209834 | -791.0104419 |
| -550.5610974 | -599.3542163 | 65.28924639  | -311.8715394 | -911.2518192 | 285.2368494  | 110.024066   |
| -747.3384903 | -658.1733275 | 123.5834495  | -170.6721885 | -854.9874928 | 149.9892637  | 39.07351924  |
| -567.2723182 | -606.8775735 | 96.21068408  | -387.098029  | -445.9942298 | -335.7918012 | -278.1573347 |
| -750.2702836 | -642.3289646 | -168.4100725 | -447.5445721 | -527.0295438 | -526.6643606 | -306.548225  |
| -351.5465527 | -587.9192658 | -520.8000371 | -299.2318298 | -514.4439177 | -223.0611442 | -321.277419  |

| TCGA.25.2408 | TCGA.25.2409 | TCGA.57.1582 | TCGA.57.1583 | TCGA.57.1585 | TCGA.57.1586 | TCGA.57.1992 |
|--------------|--------------|--------------|--------------|--------------|--------------|--------------|
| 65.10382751  | -374.7627056 | -494.4155839 | -473.1536531 | 349.180087   | -867.1506029 | -500.2092018 |
| 193.8883789  | -232.9935958 | -289.1870628 | -316.0843823 | 494.6686713  | -716.2986143 | -279.5535184 |
| -612.8865503 | -601.2936104 | -739.2083613 | -692.4923124 | -350.9563172 | -815.8850073 | -751.4244654 |
| -1228.135567 | -763.4866393 | -652.6384331 | -1706.896075 | -691.386066  | -1383.003955 | -1352.499723 |
| -2238.638395 | -2648.49285  | -999.6138258 | -2253.844442 | -1289.106858 | -1822.285815 | -1778.705074 |
| 1431.035791  | 1056.885459  | 2208.977955  | -257.0810958 | 1783.597689  | 1052.995616  | 768.6814058  |
| 2542.078027  | 2637.654263  | 2714.93146   | 3034.301591  | 2747.937694  | 2742.211953  | 3038.762847  |
| 2305.979806  | 2764.775025  | 2505.891266  | 2867.342068  | 2667.984164  | 2463.01134   | 2776.250195  |
| -1116.393072 | -2027.093765 | 1101.365513  | -2108.235023 | -763.8397611 | -679.8421675 | -274.8629091 |
| -618.8580445 | -80.92208927 | -952.5201941 | -435.2968298 | 6.033601371  | -547.22085   | 424.1915775  |
| 724.7903763  | 1386.11714   | -649.1642983 | 2013.070729  | -247.7099993 | 1472.432296  | -513.373873  |
| 2004.002834  | 1761.26873   | 2130.002784  | 2231.212129  | 2294.479271  | 1774.953237  | 2026.655592  |
| 240.5356238  | 1386.140464  | -339.8546357 | 193.8896849  | 784.5654038  | 1101.32643   | 722.9068151  |
| -469.2617897 | -482.8055422 | -2898.578917 | -2906.238814 | -873.1820533 | -305.1867043 | 226.9071326  |
| 624.6051881  | 324.3435408  | -7.304360485 | -90.34274629 | 417.8917953  | -229.3200998 | -46.21467594 |
| -4427.916559 | -4137.951467 | -4383.415836 | -4084.190032 | -4509.125377 | -3976.458265 | -4484.071753 |
| -718.9499426 | -759.5412568 | -1196.673442 | -1175.98296  | -560.4925105 | -1230.34216  | -1278.486023 |
| 163.3217873  | -294.9031165 | -602.7619362 | -478.7238833 | 277.6787998  | -906.5373708 | -418.5718592 |
| 52.36856529  | -416.8078892 | -523.7054382 | -530.096875  | 306.4967481  | -917.373151  | -471.8136399 |
| -170.9234512 | -364.3093727 | -430.4949671 | -455.0943979 | -101.9691603 | -533.0487674 | -342.1363769 |
| -359.1863489 | -484.9422641 | -573.0701611 | -597.2946131 | -296.8957287 | -602.3425951 | -320.9986256 |
| -261.9073601 | -448.3818504 | -686.5325334 | -453.8226996 | -266.6269253 | -670.5431256 | -581.1172569 |

| TCGA.57.1993 | TCGA.57.1994 |
|--------------|--------------|
| -879.0833382 | -695.245162  |
| -689.9927984 | -602.1406113 |
| -789.8332771 | -713.4929905 |
| -1339.161349 | -1207.801913 |
| -2747.59586  | -2548.383924 |
| -12.80904785 | 1524.076515  |
| 3102.359759  | 3090.799412  |
| 2561.917034  | 2742.029158  |
| 228.4342314  | -614.0651142 |
| -35.12228101 | -655.7184146 |
| -775.2993013 | 1604.325929  |
| 2420.685158  | 2299.559856  |
| 731.6599669  | 1459.256617  |
| -265.4016294 | -1189.056397 |
| -95.90369817 | -76.70371912 |
| -4388.155648 | -3991.062173 |
| -1284.123756 | -1009.427766 |
| -868.7996347 | -442.9184655 |
| -959.0161086 | -750.3672919 |
| -468.2090729 | -540.911154  |
| -541.955401  | -681.2047533 |
| -413.8519961 | -265.2234762 |



|            | F1       | F2       | F3       | F4       | F5       | F6       | F7       |
|------------|----------|----------|----------|----------|----------|----------|----------|
| GO:0048514 | 0.903872 | 0.032873 | 0.910962 | 0.340714 | 0.488109 | 0.387975 | 0.606973 |
| GO:0001944 | 0.889716 | 0.026818 | 0.960757 | 0.26923  | 0.439029 | 0.460484 | 0.644998 |
| GO:0045595 | 0.606973 | 0.044602 | 0.982157 | 0.14602  | 0.3362   | 0.510837 | 0.638592 |
| GO:0051249 | 0.460484 | 0.074304 | 0.455066 | 0.418159 | 0.569984 | 0.151047 | 0.510837 |
| GO:0050852 | 0.349859 | 0.516604 | 0.297311 | 0.423321 | 0.13872  | 0.540005 | 0.868549 |
| GO:0031294 | 0.413035 | 0.222034 | 0.285045 | 0.314208 | 0.771245 | 0.120628 | 0.89679  |
| GO:0050776 | 0.710443 | 0.392912 | 0.265372 | 0.246654 | 0.297311 | 0.178179 | 0.840475 |
| GO:0002376 | 0.903872 | 0.551902 | 0.510837 | 0.606973 | 0.164191 | 0.439029 | 0.717116 |
| GO:0002857 | 0.683974 | 0.925162 | 0.582194 | 0.439029 | 0.091732 | 0.975021 | 0.285045 |
| GO:0006959 | 0.124968 | 0.79185  | 0.819549 | 0.882651 | 0.996431 | 0.476953 | 0.65143  |
| GO:0050870 | 0.460484 | 0.243024 | 0.493739 | 0.444338 | 0.657889 | 0.854489 | 0.918058 |
| GO:0072686 | 0.540005 | 0.254027 | 0.697162 | 0.349859 | 0.184016 | 0.812602 | 0.677416 |
| GO:0048522 | 0.771245 | 0.136351 | 0.075767 | 0.208782 | 0.36861  | 0.967888 | 0.798752 |
| GO:0050672 | 0.289095 | 0.875595 | 0.186987 | 0.444338 | 0.939386 | 0.982157 | 0.363865 |
| GO:0031589 | 0.625861 | 0.01797  | 0.7508   | 0.588344 | 0.499404 | 0.79185  | 0.677416 |
| GO:0007155 | 0.784965 | 0.664373 | 0.363865 | 0.833486 | 0.072863 | 0.812602 | 0.690557 |
| GO:0022610 | 0.960757 | 0.04854  | 0.690557 | 0.265372 | 0.471428 | 0.65143  | 0.95363  |
| GO:1901342 | 0.826511 | 0.029379 | 0.613241 | 0.281034 | 0.670882 | 0.600734 | 0.925162 |
| GO:0001525 | 0.833486 | 0.009601 | 0.882651 | 0.359158 | 0.594525 | 0.433756 | 0.545937 |
| GO:0030855 | 0.235878 | 0.3362   | 0.193035 | 0.18108  | 0.20556  | 0.261552 | 0.449684 |
| GO:0060429 | 0.407948 | 0.100672 | 0.108314 | 0.327287 | 0.331724 | 0.15361  | 0.476953 |
| GO:0042127 | 0.805669 | 0.418159 | 0.439029 | 0.625861 | 0.387975 | 0.812602 | 0.281034 |

| Variables                      | D <sub>0</sub> -D <sub>1</sub> | D <sub>2</sub> | D <sub>3</sub> | D <sub>4</sub> | D <sub>5</sub> | D <sub>6</sub> -D <sub>8</sub> |
|--------------------------------|--------------------------------|----------------|----------------|----------------|----------------|--------------------------------|
| Age (per year increase)        | 1.04                           | 1.04           | 1.00           | 1.04           | 1.03           | 1.00                           |
|                                | (1.02-1.06)                    | (1.01-1.07)    | (0.97-1.02)    | (1.01-1.07)    | (1.00-1.06)    | (0.97-1.02)                    |
|                                | 8.3e-4                         | 5.7e-3         | 0.94           | 2.1e-2         | 4.3e-2         | 0.77                           |
| Stage (2 vs. 1)                | 2.39                           | 1.04           | 0.73           | 0.55           | 2.16           | 0.64                           |
|                                | (0.03-5.98)                    | (0.33-3.26)    | (0.29-1.84)    | (0.07-4.2)     | (0.78-5.96)    | (0.08-5.05)                    |
|                                | 0.82                           | 0.94           | 0.50           | 0.56           | 0.14           | 0.67                           |
| Stage (3 vs. 1)                | 0.67                           | 1.86           | 1.03           | 3.58           | 4.33           | 1.40                           |
|                                | (0.09-5.00)                    | (0.71-4.91)    | (0.35-3.04)    | (1.67-7.67)    | (2.10-8.91)    | (0.61-3.21)                    |
|                                | 0.70                           | 0.21           | 0.96           | 0.001          | 6.8e-5         | 0.42                           |
| Stage (4 vs. 1)                | 1.52                           | 5.33           | 4.06           | 13.00          | 7.10           | 1.66                           |
|                                | (0.20-11.35)                   | (1.98-14.31)   | (1.75-9.43)    | (5.40-31.32)   | (3.00-16.80)   | (.68-4.03)                     |
|                                | 0.69                           | 9.2e-4         | 0.001          | 1.1e-8         | 8.0e-6         | 0.26                           |
| Race (African vs. Caucasian)   | 2.38                           | 0.24           | 1.59           | 0.93           | 1.24           | NA                             |
|                                | (0.93-6.11)                    | (0.03-1.83)    | (0.65-3.91)    | (0.38-2.26)    | (0.62-2.46)    |                                |
|                                | 0.07                           | 0.17           | 0.31           | 0.87           | 0.55           |                                |
| ArcTIL risk score (continuous) | 1.51                           | 1.95           | 1.98           | 1.92           | 2.57           | 1.42                           |
|                                | (1.22-1.87)                    | (1.36-2.78)    | (1.42-2.76)    | (1.36-2.71)    | (1.89-3.49)    | (1.09-1.85)                    |
|                                | 1.6e-04                        | 2.5e-4         | 5.2e-5         | 2.1e-4         | 1.6e-9         | 7.8e-3                         |
| F1                             | 1.05                           | 1.31           | 0.91           | 0.91           | 1.16           | 1.15                           |
|                                | (0.83-1.32)                    | (0.90-1.91)    | (0.61-1.34)    | (0.64-1.31)    | (0.84-1.59)    | (0.88-1.51)                    |
|                                | 0.68                           | 0.16           | 0.63           | 0.62           | 0.37           | 0.32                           |
| F2                             | 0.86                           | 0.83           | 0.42           | 0.49           | 0.33           | 0.77                           |
|                                | (0.55-1.33)                    | (0.39-1.76)    | (0.16-1.07)    | (0.25-0.98)    | (0.17-0.64)    | (0.45-1.30)                    |
|                                | 0.49                           | 0.63           | 0.07           | 0.04           | 1e-3           | 0.32                           |
| F3                             | 1.27                           | 3.14           | 1.37           | 0.93           | 2.32           | 1.22                           |
|                                | (0.84-1.93)                    | (1.32-7.48)    | (0.63-3.00)    | (0.45-1.95)    | (1.19-4.56)    | (0.72-2.09)                    |
|                                | 0.25                           | 0.01           | 0.43           | 0.86           | 0.01           | 0.46                           |
| F4                             | 0.99                           | 0.63           | 0.73           | 0.59           | 0.77           | 0.90                           |
|                                | (0.83-1.18)                    | (0.46-0.86)    | (0.54-0.98)    | (0.45-0.76)    | (0.61-0.98)    | (0.73-1.11)                    |
|                                | 0.88                           | 0.003          | 0.04           | 4e-5           | 0.03           | 0.33                           |
| F5                             | 0.72                           | 0.99           | 0.49           | 0.83           | 0.44           | 1.07                           |
|                                | (0.55-0.96)                    | (0.61-1.61)    | (0.32-0.76)    | (0.54-1.29)    | (0.31-0.63)    | (0.78-1.45)                    |
|                                | 0.23                           | 0.97           | 0.01           | 0.41           | 9e-6           | 0.69                           |
| F6                             | 1.47                           | 3.03           | 1.05           | 2.06           | 1.60           | 1.17                           |
|                                | (0.97-2.24)                    | (1.47-6.24)    | (0.59-1.87)    | (1.10-3.87)    | (0.88-2.92)    | (0.75-1.85)                    |
|                                | 0.70                           | 0.003          | 0.88           | 0.02           | 0.12           | 0.49                           |
| F7                             | 1.52                           | 1.00           | 0.83           | 0.98           | 0.99           | 1.42                           |
|                                | (1.07-2.15)                    | (0.58-1.73)    | (0.49-1.42)    | (0.58-1.66)    | (0.63-1.55)    | (0.97-2.07)                    |
|                                | 0.02                           | 0.99           | 0.50           | 0.94           | 0.96           | 0.07                           |

| Variables                    | D <sub>1</sub>                 | D <sub>2</sub>                | D <sub>3</sub>                | D <sub>4</sub>                 | D <sub>5</sub>                 | D <sub>6</sub> -D <sub>8</sub> |
|------------------------------|--------------------------------|-------------------------------|-------------------------------|--------------------------------|--------------------------------|--------------------------------|
| Age (per year increase)      | 1.04<br>(1.02-1.06)<br>8.2e-4  | 1.03<br>(0.99-1.06)<br>5.0e-2 | 0.99<br>(0.97-1.03)<br>0.99   | 1.05<br>(1.00-1.09)<br>2.9e-3  | 1.02<br>(0.99-1.06)<br>0.16    | 1.00<br>(0.97-1.03)<br>0.81    |
| Stage (2 vs. 1)              | 2.37<br>(0.22-3.29)<br>0.96    | 2.54<br>(0.70-9.22)<br>0.15   | 1.10<br>(0.37-3.22)<br>0.86   | 1.02<br>(0.13-8.09)<br>0.98    | 2.55<br>(0.90-7.24)<br>0.07    | 0.81<br>(0.08-7.81)<br>0.71    |
| Stage (3 vs. 1)              | 1.17<br>(0.12-11.39)<br>0.89   | 4.22<br>(1.41-12.59)<br>0.01  | 1.67<br>(0.54-5.14)<br>0.37   | 3.29<br>(1.467.38)<br>3.9e-3   | 5.06<br>(2.26-11.34)<br>8.1e-5 | 1.47<br>(0.62-3.53)<br>0.86    |
| Stage (4 vs. 1)              | 3.17<br>(0.32-30.82)<br>0.32   | 3.34<br>(0.86-12.72)<br>0.078 | 3.23<br>(1.11-9.37)<br>0.03   | 7.49<br>(2.58-21.70)<br>2.1e-4 | 5.71<br>(2.23-17.61)<br>2.8e-4 | 1.42<br>(0.55-1.68)<br>0.38    |
| Race (African vs. Caucasian) | 6.16<br>(2.21-17.21)<br>5.2e-4 | 0.35<br>(0.04-2.80)<br>0.32   | 1.18<br>(0.47-3.01)<br>0.72   | 0.67<br>(0.27-1.65)<br>0.38    | 0.97<br>(0.47-1.98)<br>0.93    | NA                             |
| ArcTIL risk score            | 1.33<br>(1.04-1.71)<br>2.5e-2  | 2.29<br>(1.48-3.53)<br>2.0e-4 | 2.06<br>(1.40-3.04)<br>2.5e-4 | 1.59<br>(1.09-2.31)<br>1.5e-2  | 2.45<br>(1.76-3.40)<br>9.2e-8  | 1.37<br>(1.04-1.81)<br>2.3e-2  |
